1 **Single cell transcriptomics, mega-phylogeny and the genetic basis of**  
2 **morphological innovations in Rhizaria**

3

4 Anders K. Krabberød<sup>1</sup>, Russell J. S. Orr<sup>1</sup>, Jon Bråte<sup>1</sup>, Tom Kristensen<sup>1</sup>, Kjell R. Bjørklund<sup>2</sup> & Kamran  
5 Shalchian-Tabrizi<sup>1\*</sup>

6

7 <sup>1</sup>Department of Biosciences, Centre for Integrative Microbial Evolution and Centre for Epigenetics,  
8 Development and Evolution, University of Oslo, Norway

9 <sup>2</sup>Natural History Museum, Department of Research and Collections University of Oslo, Norway

10

11 \*Corresponding author:

12 Kamran Shalchian-Tabrizi

13 [Kamran@ibv.uio.no](mailto:Kamran@ibv.uio.no)

14 Mobile: + 47 41045328

15

16

17 **Keywords:** cytoskeleton, phylogeny, protists, Radiolaria, Rhizaria, SAR, single-cell, transcriptomics

## 18 **Abstract**

19 The innovation of the eukaryote cytoskeleton enabled phagocytosis, intracellular transport and  
20 cytokinesis, and is responsible for diverse eukaryotic morphologies. Still, the relationship between  
21 phenotypic innovations in the cytoskeleton and their underlying genotype is poorly understood.  
22 To explore the genetic mechanism of morphological evolution of the eukaryotic cytoskeleton we  
23 provide the first single cell transcriptomes from uncultivable, free-living unicellular eukaryotes: the  
24 radiolarian species *Lithomelissa setosa* and *Sticholonche zanclea*. Analysis of the genetic  
25 components of the cytoskeleton and mapping of the evolution of these to a revised phylogeny of  
26 Rhizaria reveals lineage-specific gene duplications and neo-functionalization of  $\alpha$  and  $\beta$  tubulin in  
27 Retaria, actin in Retaria and Endomyxa, and Arp2/3 complex genes in Chlorarachniophyta. We  
28 show how genetic innovations have shaped cytoskeletal structures in Rhizaria, and how single cell  
29 transcriptomics can be applied for resolving deep phylogenies and studying gene evolution of  
30 uncultivable protist species.

31

## 32 Introduction

33 One of the major eukaryotic innovations is the cytoskeleton, consisting of microtubules, actin  
34 filaments, actin-related proteins, intermediate filaments and motor proteins. Together these  
35 structures regulate the internal milieu of the cell, aid in movement, cytokinesis, phagocytosis, and  
36 predation (Dustin 1984, Grain 1986, Vale 2003, Wickstead & Gull 2011, Katz 2012, Cavalier-Smith  
37 et al. 2014). Of essential importance, and the main focus of this work, the cytoskeleton of  
38 unicellular eukaryotes determines the morphological patterning of the cell.

39 The evolution of the eukaryotic cytoskeleton is an intriguing story of gene evolution. Homologs to  
40 actin and tubulin genes can be found in prokaryotes and Archaea, but the origin of the motor  
41 proteins is unclear, lacking distinct homologs in prokaryotes (Vale 2003, Wickstead & Gull 2011).  
42 All three major types of motor proteins – kinesin, dynein and myosin – are present in all eukaryote  
43 supergroups. Therefore, it is likely that they were already present in the last eukaryotic common  
44 ancestor (LECA). Early in the evolution of eukaryotes the cytoskeletal filaments of prokaryotes  
45 were given new functions and new motor proteins were invented in addition to a large repertoire  
46 of molecules that modify and interact with both the cytoskeleton and the motor proteins  
47 (Goldstein 2001, Karcher et al. 2002, Schliwa & Woehlke 2003, Vale 2003, Seabra & Coudrier 2004,  
48 Wickstead & Gull 2011).

49 Most of what we know about the eukaryotic cytoskeleton comes from studies of humans, plants  
50 and fungi (Jékely 2007, Wickstead & Gull 2011), but less is known about the genetic machinery  
51 and the molecular architecture of the cytoskeleton in non-model single celled eukaryotes  
52 (protists). Our current knowledge about the evolution of cytoskeletal genes in protists stems from  
53 human pathogens, e.g. *Plasmodium*, *Toxoplasma* and *Cryptosporidium* (Wickstead & Gull 2011,  
54 Burki & Keeling 2014), but virtually nothing is known about how the evolution of these genes has  
55 shaped cytoskeletal morphology in other protists.

56 In this paper we therefore trace the evolution of key cytoskeletal genes in a major group of  
57 eukaryotes, Rhizaria, consisting predominantly of understudied single celled protists (Burki &  
58 Keeling 2014). Rhizaria is a huge eukaryotic group and harbours species displaying a stunning  
59 variety of morphological traits, from naked amoebas to species with delicate and spectacular tests  
60 or skeletons. Rhizaria as a group was originally established based on molecular phylogenies that  
61 placed the three clades Cercozoa, Radiolaria, and Foraminifera together (Cavalier-Smith 2002,

62 Nikolaev et al. 2004). Although no clearly defined phenotypic synapomorphies for Rhizaria have  
63 been described (Pawlowski 2008), there is a common theme to many rhizarians: well-developed  
64 pseudopodia which are often reticulose or filose. The different groups of rhizarians use their  
65 pseudopodia in different ways: Some form complicated reticulose networks, e.g. many  
66 chlorarachniophytes, others use pseudopodia stiffened by microtubules to capture prey, e.g.  
67 Radiolaria, to move molecules and organelles, e.g. Foraminifera, or even as oars in Taxopodida  
68 (Cachon et al. 1977, Anderson 1978, Sugiyama et al. 2008, Bass et al. 2009). But how this widely  
69 different application of pseudopodia has evolved and how the morphological evolution is reflected  
70 in changes to cytoskeletal genes is unknown. The cytoskeleton and motor proteins are an integral  
71 part of pseudopod development and usage. In the formation of pseudopods in mouse melanoma,  
72 actin and myosin interacts in order to make a protrusion in the plasma membrane creating the  
73 leading edge of the pseudopod. Nucleators anchor actin to the cell membrane and actin-related  
74 proteins (i.e. the Arp2/3-complex) recruits additional actin filaments to form the branching  
75 network that supports the pseudopod (Giannone et al. 2007, Mogilner & Keren 2009). The same  
76 mechanism drives pseudopod growth and development in the amoeba *Dictyostelium* (Ura et al.  
77 2012). More rigid pseudopods are made with bundles of microtubules that stiffen and support the  
78 pseudopods (called axopodia in Radiolaria and reticulopodia in Foraminifera ; Anderson 1983, Lee  
79 & Anderson 1991). The microtubules are typically hollow tubes or helical filament composed of  
80 alternating  $\alpha$ - and  $\beta$ -tubulin subunits (Welnhofner & Travis 1998). The evolution of the molecular  
81 components of the cytoskeleton and pseudopodia in Rhizaria, and protists in general, remains  
82 unclear.

83 To understand the evolution of the cytoskeleton and pseudopodia in Rhizaria a fully resolved  
84 phylogenetic tree is vital, but getting a stable phylogeny for the entire group has proven  
85 problematic. The main issues have been the relationship between Radiolaria and Foraminifera (i.e.  
86 Retaria), the monophyly of Cercozoa, as well as the relationship between Rhizaria and its  
87 immediate neighbours in the SAR supergroup, Stramenopiles and Alveolata (Burki et al. 2007,  
88 2013, 2016, Parfrey et al. 2010, Krabberød et al. 2011, Sierra et al. 2013, 2015, Katz & Grant 2014,  
89 Cavalier-Smith et al. 2015).

90 Reconstruction of multi-gene phylogenies have been hindered by lacking molecular data from key  
91 rhizarian groups (Burki & Keeling 2014). The main reason for scarce data from Rhizaria is lacking  
92 knowledge of how to hold species in culture. We have previously applied single cell genomics  
93 (combined with gene-targeted PCR) to study the diversity of Retaria, but this method is not

94 optimal to obtain large numbers of protein coding genes as it also covers intergenic regions (Bråte  
95 2012, Krabberød 2011). Other studies targeting the retarian transcriptome have required pooling  
96 many, sometimes several hundred cells (Sierra et al. 2013, Balzano et al. 2015), a method not  
97 optimal when morphological markers for species identification are missing or hard to define and  
98 cultures cannot be established.

99 Here, we use single cell transcriptomics on two key Rhizaria species (*Sticholonche zanclea* and  
100 *Lithomelissa setosa*) to build multi-gene phylogenies and investigate the genetic basis of  
101 cytoskeletal differences in Rhizaria. Our aim is to reveal processes at the genetic level that may  
102 have caused phenotypic changes to the cytoskeleton, and thereby better understand major  
103 morphological transitions in this group of organisms. A key aspect is to understand if gene changes  
104 are due to co-option processes, where deeply diverging homologs of cytoskeleton genes have  
105 been recruited to new functions, or if novelties of morphologies are caused by innovations of new  
106 gene families through gene duplication and neofunctionalization. Are genetic changes specific for  
107 each subgroup of Rhizaria or are they common between lineages? And can these changes be used  
108 to define homological structures and thereby define morphologically distinct categories of  
109 organismal lineages in Rhizaria? To address these questions we apply single cell transcriptomics on  
110 two free-living radiolarian species.

111

## 112 **Results**

### 113 **Single cell transcriptomics of two uncultured protists**

114 We generated cDNA libraries from two radiolarian specimens: *Lithomelissa setosa* and  
115 *Sticholonche zanclea* (Figure 1). The cDNA was sequenced on the Illumina MiSeq platform, 300bp  
116 paired end. This resulted in 19,894,654 reads for *S. zanclea* and 11,590,658 for *L. setosa*, which  
117 were *de novo* assembled using the Trinity platform (Haas et al. 2013). Assembly resulted in two  
118 Single Cell Transcriptomes (SCT) with 4,749 predicted genes for *S. zanclea* and 2,122 predicted  
119 genes for *L. setosa* (Table 1). Subsampling and re-assembly of reads showed that the sequencing  
120 threshold for both libraries was close to maximum (Figure 1 - figure supplement 1). We assessed  
121 the suitability of the data for phylogenomic reconstruction by using the BIR pipeline for single  
122 gene alignment and tree construction (Kumar et al. 2015). Using 255 seed alignments covering the  
123 eukaryote Tree of Life (Burki et al., 2012) we identified 54 and 16 corresponding orthologous gene

124 sequences from *S. zancea* and *L. setosa* respectively. In addition BIR extracted 3,534 gene  
125 sequences from Marine Microbial Eukaryote Transcriptome Sequencing Project, MMETSP (Keeling  
126 et al., 2014) and 793 proteins from GenBank with TaxID 543769 (Rhizaria) and added these to their  
127 corresponding alignments (See supplementary table S1). After concatenation of all gene  
128 alignments we had a super-matrix consisting of 91 taxa and 54,898 amino acids (255 genes).

129

### 130 **Bayesian GTRCAT trees show consistent phylogeny for SAR and subgroups**

131 In the Bayesian analysis of the full dataset using the CATGTR model (255 genes 54,898 AA, 91 taxa,  
132 Figure 2), Stramenopiles and Alveolates formed a clade, with Rhizaria as sister; branches for these  
133 groups are fully supported (1.00 posterior probability (pp)). Haptophytes appeared as sister to SAR  
134 (0.87 pp). The relationship and support values did not change for SAR with the removal of fast  
135 evolving sites (Figure 2 – figure supplement 1; supplementary table S4). The haptophytes, jumped  
136 to a position basal to Archaeplastida (0.82 pp) when four bins of fast evolving sites were removed  
137 (Supplementary table S4).

138 Within Rhizaria, the three groups Foraminifera, Radiolaria and Taxopodida, all monophyletic,  
139 formed a cluster (i.e. Retaria) with maximum support even when fast evolving sites were removed  
140 (i.e. always 1.00 pp). Radiolaria and Foraminifera were placed together as a monophyletic group  
141 (0.71 pp) with *S. zancea* branching off as sister to them both. This topology remained constant  
142 after removing fast evolving sites (Figure 2 – figure supplement 1; supplementary table S4). The  
143 posterior probability for the monophyly of Radiolaria together with Foraminifera, i.e. excluding *S.*  
144 *zancea*, increased to 0.97 when fast evolving sites were removed (Figure 2 – figure supplement 1).  
145 Endomyxa was monophyletic (1.00 pp) and always sister to Retaria with full support (1.00 pp),  
146 rendering Cercozoa paraphyletic. Filosa was monophyletic in all analyses (1.00 pp).

147

### 148 **ML trees converged towards Bayesian topology after removal of fast evolving sites**

149 In contrast, the maximum likelihood (ML) analysis of the full dataset using the LG model (255  
150 genes, 54,898 AA, 91 taxa, Figure 3), grouped Alveolata with Rhizaria instead of the Stramenopiles  
151 (96% bootstrap support (bs)). Retaria was recovered with high support (88% bs) as in the Bayesian  
152 tree, but *S. zancea* was no longer placed ancestrally to radiolarians and Foraminifera. Instead *S.*  
153 *zancea* was sister to Radiolarians (88% bs). Importantly, however, *S. zancea* changed to a basal

154 position in Retaria after removal of fast evolving sites, consistent with all the GTRCAT Bayesian  
155 trees (Figure 3 - figure supplement 1; Supplementary table S4).

156 Removal of fast evolving sites did not change the monophyly of Foraminifera and Radiolaria  
157 (excluding *S. zanclea*) or the sister relation between alveolates and Rhizaria, but the support  
158 values were reduced in both instances to 50% bs for Radiolaria together with Foraminifera and  
159 67% bs for the alveolates together with Rhizaria (Figure 3 – figure supplement 1; Supplementary  
160 table S4). Endomyxa and Retaria group together with full support as in the Bayesian analysis  
161 (100% bs), making Cercozoa paraphyletic. As in the Bayesian phylogeny haptophytes appeared as  
162 sister to SAR (77% bs) and changed position basal to the plants, glaucophytes and cryptomonads  
163 (73% bs) after removal of fast evolving sites. Species with more than 10% missing data in the final  
164 concatenated data matrix were placed on the ML phylogeny using the Evolutionary Placement  
165 Algorithm (Berger & Stamatakis 2011). Five species were placed in Endomyxa, five in Filosa, two in  
166 Radiolaria, and finally ten species in Foraminifera (Figure 14).

167

#### 168 **Influence of fast evolving sites and the choice of model on the phylogeny**

169 The discrepant topologies of the Bayesian (CATGTR) and ML (LG) trees could be due to the  
170 different models implemented in these two approaches. We assessed the influence of these two  
171 models by running Bayesian inferences using the LG model (the opposite: running ML with a  
172 CATGTR model is currently not possible). This was done on a smaller alignment to reduce the  
173 computational burden (146 genes, 33,081 AA, 91 taxa, see methods for further explanation). The  
174 resulting Bayesian tree showed an important result: *S. zanclea* now grouped with Radiolaria (0.67  
175 pp, Figure 3 – figure supplement 1) as in the ML (LG) tree, and not as sister to Foraminifera and  
176 Radiolaria, as in all Bayesian trees with the CATGTR model. Other branching patterns in the  
177 Rhizaria phylogeny were unaffected.

178 We repeated the ML (LG) analyses after removing fast evolving sites on the full dataset as well as  
179 the reduced dataset. While alveolates and Rhizaria formed a clade in the full and small dataset  
180 (85% bs, Figure 3- figure supplement 1), removal of four categories of fast evolving site moved  
181 alveolates to the stramenopiles in the dataset with 146 genes (74% bs, Figure 3 - figure  
182 supplement 1; Supplementary table S4), a result congruent with the Bayesian topology. The  
183 support for alveolates together with Rhizaria was also weakened in the dataset with 255 gene  
184 when four categories of fast evolving sites were removed, from 96% bs, to 67% bs. When

185 Foraminifera was excluded from the 255 gene dataset with four categories removed,  
186 Stramenopiles and Alveolata formed a group with Rhizaria as sister (57% bs. Table S4).

187

### 188 **Actin radiation in Rhizaria and unique duplications in Retaria and Endomyxa**

189 We identified 6 actin sequences in our SCTs. From MMETSP we identified 18 foraminiferan actin  
190 and 18 chlorarachniophyte sequences. Phylogenetic analysis of these and other available actin  
191 sequences retrieved from GenBank and Pfam revealed that Retaria (including *S. zanglea*) have two  
192 distinct paralogs of actin – actin1 and 2 – where actin2 is fully supported (Figure 4). Actin1 is  
193 supported in the Bayesian analysis (0.87 pp) but not in by ML analysis. Actins from Endomyxa form  
194 a weakly supported monophyletic group with retarian actin2 (14% bs/0.68 pp). This clade, in turn,  
195 groups together with retarian actin1 (59% bs/ 0.97 pp), and is a synapomorphy for Retaria and  
196 Endomyxa. There are possibly three paralogs of endomyxean actin, (named a-c in Figure 4) albeit  
197 lacking support (a: 32%bs /0.6 pp, b: 16 %bs /- and c: 22 %bs /0.62 pp, Figure 4).

198

### 199 **Arp2/3 complex gene duplication in Chlorarachniophyta**

200 Of the seven genes in the Arp2/3 complex, which is responsible for branching of actin filaments  
201 and recruitment of new actin, we identified *Arp2*, *Arp3*, *ARPC2* and *ARPC5* from *S. zanglea*, but  
202 only *Arp2* from *L. setosa* (Figure 5). From MMETSP we identified sequences of all seven genes  
203 from both Chlorarachniophyta and Foraminifera. Phylogenetic analysis of these genes revealed  
204 that all chlorarachniophytes have two distinct paralogs of both *Arp2* and *ARPC1* (Figure 5A),  
205 recovered with maximum support (100% bs/1.0 pp). No other species of Rhizaria has undergone  
206 the same gene duplication in the Arp2/3 complex as the chlorarachniophytes (Figure 5B).

207

### 208 **Neofunctionalization of Arp2/3 in Chlorarachniophytes**

209 Comparative evolutionary analyses of the duplicated Arp2/3 complex genes (*Arp2* and *ARPC1*)  
210 were performed by examining the evolutionary rates for each paralog, and then mapping the  
211 genes to structural models using Consurf (Ashkenazy et al. 2010, Celniker et al. 2013). The analysis  
212 showed that the two different forms of *Arp2* (*Arp2a* and *Arp2b*, Figure 6) and the two different  
213 forms of *ARPC1* (*ARPC1a* and *ARPC1b*, Figure 7) follow a pattern where the most conserved sites  
214 are localized inside the protein structure. Comparison of the surface between the two *Arp2*



215 proteins (Arp2a and Arp2b, Figure 6) show shared conserved residues in contact surfaces against  
216 other proteins in the Arp2/3 complex (colored green in Figure 8). Similarly, the two different  
217 paralogs of ARPC1 (ARPC1a and ARPC1b, Figure 8) show shared conserved sites localized inside  
218 the complex. In contrast, the surfaces of the two Arp2 and ARPC1 copies show more variable  
219 substitution rates, and all paralogs have patches with mutually exclusive conserved residues  
220 (figure 8). As the surfaces of Arp2 and ARPC1 are responsible for the recruitment of the daughter  
221 filament and are important for anchoring the two actin strands to each other, the divergent  
222 substitution patterns imply that the pairs of paralogs have evolved into different directions from  
223 the ancestral gene and thereby undergone sub-functionalization.

224

## 225 **Myosin evolution in Rhizaria**

226 We identified 133 myosin transcripts from MMETSP with rhizarian origin. A phylogenetic  
227 reconstruction of the newly identified rhizarian myosins together with already published myosin  
228 classes spanning a broad taxonomical distribution of eukaryotes (Richards & Cavalier-Smith 2005,  
229 Sebé-Pedrós et al. 2014) revealed the presence of two known classes (I<sub>f</sub> and IV) and three  
230 previously unknown classes of myosin in Rhizaria (XXXV, XXXVI and XXXVII, following the naming  
231 scheme of Sebé-Pedrós et al. (2014)). Myosin XXXVII is unique for Rhizaria, and marks the first  
232 known synapomorphy for the group (Figure 9). It is highly supported (100 % bs and 1.0 pp) and has  
233 a molecular signal distinct from other described myosins (Richards & Cavalier-Smith 2005, Sebé-  
234 Pedrós et al. 2014). In this rhizarian-unique class there has been an additional radiation within the  
235 chlorarachniophytes into three separate paralogs, all fully supported (100 % bs and 1.0 pp, Figure  
236 9). Rhizarians have also gained a large repertoire of myosin IV, with six paralogs in  
237 Chlorarachniophyta and two in Foraminifera. All paralogs were well supported phylogenetically (bs  
238 > 90 % and pp >0.9) and differed from each other in functional domains (Figure 9). There was also  
239 a class unique to Chlorarachniophyta that resembled myosin IV by having a MYTH4 domain at the  
240 C-terminal, but with additional domains at the N-terminal usually not present in myosin IV  
241 (Richards & Cavalier-Smith 2005, Sebé-Pedrós et al. 2014). However both paralogs of  
242 Chlorarachniophyta in this class were phylogenetically distinct from myosin IV to warrant them to  
243 be given a new class (myosin XXXV). We also found myosin I<sub>f</sub> in Chlorarachniophyta, which have  
244 been suggested to be present in the last common ancestor of all eukaryotes and recently lost in  
245 Rhizaria (Sebé-Pedrós et al. 2014). However the presence of two paralogs of myosin I<sub>f</sub> in  
246 chlorarachniophytes show that it was present in the ancestor to Rhizaria, but that it might have

247 been lost in Endomyxa and Retaria after they separated from the chlorarachniophytes. Finally  
248 there was a group unique to Chlorarachniophyta with two paralogs, named myosin XXXVI (Figure  
249 9).

250

### 251 **$\alpha$ - and $\beta$ -tubulin gene duplications in Retaria**

252 We report 16 new  $\alpha$ -tubulin and 19 new  $\beta$ -tubulin sequences from our two retarian  
253 transcriptomes: 4  $\alpha$ -tubulin, and 9  $\beta$ -tubulin from *L. setosa*, 12  $\alpha$ -tubulin and  $\beta$ -tubulin from *S.*  
254 *zancelea*. Additionally, we identified 26  $\alpha$ -tubulin and 42  $\beta$ -tubulin sequences from other rhizarian  
255 species in the MMETSP data (i.e. 12 Chlorarachniophyta and 14 Foraminifera  $\alpha$ -tubulins; 10  
256 Chlorarachniophyta and 32 Foraminifera  $\beta$ -tubulin). All these genes and other homolog sequences  
257 identified in GenBank were added to the Pfam seed alignment for  $\alpha$  and  $\beta$ -tubulin (Finn et al.  
258 2014). The phylogenetic tree of rhizarian  $\alpha$ -tubulin revealed two different version of the gene: the  
259 canonical version of the  $\alpha$ -tubulin gene ( $\alpha$ 1-tubulin;  $\alpha$ 1) and a novel group ( $\alpha$ 2-tubulin;  $\alpha$ 2) found  
260 only in Retaria (Figure 10). The split separating the two versions received maximal support (100%  
261 bs/ 1.0 pp). We identified  $\alpha$ 2-tubulin in the SCTs from both *L. setosa* and *S. zancelea*. Together with  
262 the available data from other Rhizaria, we confirm that this paralog is unique for Retaria. In  
263 Foraminifera there were several paralogs of  $\alpha$ 2, with most copies in *Reticulomyxa filosa* (25  
264 copies). Foraminifera  $\alpha$ 2 was paraphyletic with a clade branching at the base of Retaria (100% bs/  
265 1.0 pp), before the Radiolaria and Taxopodida  $\alpha$ 2 clade. The bootstrap support was low (70 % bs),  
266 while the posterior probability was high (0.97 pp) for the branch that separated this group from  
267 the rest of the Foraminifera (Figure 10).

268 Similarly, the  $\beta$ -tubulin trees contained a clearly divergent clade (i.e.  $\beta$ 2-tubulins) with several  
269 copies for each Retarian group (Figure 11). All  $\beta$ 2-tubulin copies were grouped together with high  
270 support (100% bs/ 1.0 pp) in agreement with earlier studies (Hou et al. 2013). We also found that  
271 the  $\beta$ 2 copies were present in Taxopodida as well as in Foraminifera and Radiolaria.

272

### 273 **Neofunctionalization of tubulin genes in Retaria**

274 Comparative evolutionary analyses of the tubulin paralogs were done to identify patterns of  
275 functional change. This was performed by estimation of evolutionary rates and mapping site rates  
276 to tubulin structural models with ConSurf (Ashkenazy et al. 2010, Celniker et al. 2013). Highly  
277 conserved amino acid residues were assumed to be functionally important and variable residues

278 to be of less importance for function. We therefore compared separately  $\alpha 1$  with  $\alpha 2$ , and  $\beta 1$  with  
279  $\beta 2$ ; identifying sites conserved in one paralog and variable in the other. Such sites were believed  
280 to have undergone functional shifts and therefore considered important for cytoskeleton  
281 evolution. We also examined regions of the  $\alpha$ - and  $\beta$ -tubulin structures known to be important for  
282 microtubule function and dynamics. Evolutionary changes in these areas are likely to affect the  
283 overall function of the microtubules.

284 Tracing evolutionary rates on the molecular structure of  $\alpha$ - and  $\beta$ -tubulin (figure 12 and 13)  
285 revealed two patterns of functional change between the conventional and new tubulin genes:  
286 First, areas that are considered to be functionally important and conserved in  $\alpha$ - and  $\beta$ -tubulin in  
287 general were conserved in  $\alpha 1$  and  $\beta 1$  genes while being highly variable in  $\alpha 2$  and  $\beta 2$ , with  
288 differences being most prominent in  $\alpha$ -tubulin. This pattern was observed for both inter- and  
289 intra-dimerization surfaces between monomers (i.e. longitudinal interactions important for  
290 protofilament assembly and disassembly), as well as lateral interactions between protofilaments.  
291 Both the T7-loop and H8 helix, important for longitudinal interactions, are extremely conserved in  
292 the original variant, while highly variable in the novel paralog. And similarly for the lateral contact  
293 points, helix H12, which forms a ridge on the outside of the microtubule and therefore affects  
294 binding and movement of motor proteins along the filament (Löwe et al. 2001) is much more  
295 variable in the novel  $\alpha 2$ -tubulin paralog than  $\alpha 1$ . Even the highly conserved residues in the M-loop  
296 of the original tubulin variants are highly variable for  $\alpha 2$  and  $\beta 2$ . These are residues directly  
297 interacting between neighboring protofilaments (Löwe et al. 2001). Taken together, all major  
298 contact areas both for lateral and longitudinal interactions are less conserved in the novel paralogs  
299 compared to the original, especially for  $\alpha 2$ .

300 Second, and in contrast to the pattern above, areas of the tubulin molecules considered to be  
301 functionally less important typically evolve faster than the contact surfaces. Several residues  
302 outside of the conventional longitudinal and lateral binding sites are highly conserved in both  $\alpha 2$   
303 and  $\beta 2$  while highly variable in the original  $\alpha 1$  and  $\beta 1$  genes (Supplementary alignment). Many of  
304 these residues are exposed on the surface of the monomers and could represent new sites for  
305 other tubulin interactions or surfaces for motor protein attachment and movement.

306 Altogether, both the  $\alpha 2$ - and  $\beta 2$ -tubulins have undergone dramatic evolutionary changes and are  
307 likely functionally distinct from their  $\alpha 1$  and  $\beta 1$  counterparts (Figure 12 and 13).

308

309

## 310 **Discussion**

311 The last common ancestor of Rhizaria was most likely a naked, heterotrophic flagellate, who relied  
312 extensively on its pseudopodia to explore the environment and to catch prey (Cavalier-Smith  
313 2009). Its pseudopods were supported by actin and at least one group of myosins unique to  
314 Rhizaria (Figure 4 and 9, summarized in Figure 14). The Rhizarian cytoskeletons have since  
315 undergone evolutionary changes and their diversification follows a pattern where the major  
316 groups have their own favoured filament: the chlorarachniophytes have relied on actin to support  
317 their reticulose pseudopodia while the axopodia and reticulopodia in Retaria have been stiffened  
318 by microtubules composed of tubulin. Although some structural differences between lineages are  
319 known, little is established about the genetic basis of these phenotypes. Here we investigate the  
320 genetic evolution responsible for diversification of the cytoskeleton and present a hypothesis that  
321 relate these evolutionary changes to the varying morphology of Rhizaria groups. In order to fully  
322 understand the evolution of the cytoskeleton in Rhizaria we started by constructing a robust  
323 phylogenetic tree on which to map the evolutionary events.

324

### 325 **Placing Rhizaria in the Tree of Life**

326 Rhizaria has an evolutionary origin at the intersection between two very morphologically diverse  
327 and abundant lineages in the Tree of Life: the alveolates and stramenopiles. Together the three  
328 lineages form the supergroup SAR (Burki et al. 2007). Although there is little doubt that these  
329 three lineages are closely related to each other, the exact relationship between them remains  
330 debated. Three main hypotheses exists: either Stramenopiles and Rhizaria are monophyletic and  
331 sister to Alveolates (Burki et al. 2007, 2013, Katz & Grant 2014), alveolates and stramenopiles  
332 constitute a monophyletic group with Rhizaria as sister (Burki et al. 2008, 2010, 2012, 2016,  
333 Parfrey et al. 2010, Cavalier-Smith et al. 2015), or finally Rhizaria and Alveolates are monophyletic  
334 with Stramenopiles as sister group (Sierra et al. 2013, 2015, He et al. 2016).

335 Our Bayesian and ML inferences resulted in two different phylogenies. The Bayesian tree inferred  
336 with the CATGTR model grouped alveolates and stramenopiles, whereas the ML tree with the LG  
337 model clustered alveolates with Rhizaria. This inconsistency was evaluated by removing fast  
338 evolving sites, which have been suggested to contain misleading phylogenetic information  
339 (Philippe et al. 2005, Townsend 2007, Cummins & McInerney 2011, Townsend et al. 2012).

340 Removing such sites, caused no changes in the Bayesian phylogeny of the SAR groups, but the ML  
341 analyses converged towards the Bayesian tree by grouping alveolates and stramenopiles (Figure  
342 4A and Suppl. table S4). The CATGTR model is a better representation of amino acid substitution  
343 patterns than the LG model, because it takes into account substitution pattern heterogeneity  
344 (Lartillot & Philippe 2004). In addition, the Bayesian inferences were less affected by site selection  
345 and were always reconstructing essentially identical phylogenies with the CATGTR model,  
346 altogether strongly supporting the grouping of alveolates and stramenopiles with exclusion of  
347 Rhizaria.

348 One of the remaining challenges about the SAR phylogeny is to identify the closest sister group of  
349 SAR in the global phylogeny of eukaryotes. Recently it has been proposed that haptophytes  
350 together with Centrohelida make up the sister clade to SAR (Burki et al. 2016). This is congruent to  
351 our Bayesian and ML trees where the haptophytes branch at the base of SAR, at least prior to the  
352 removal of fast evolving sites. However, removal of fast evolving sites typically groups  
353 haptophytes together with cryptophytes at the base of the Archaeplastida, as seen in other recent  
354 multi-gene phylogenies (Supplementary table S4; Parfrey et al., 2010; Brown et al., 2012; Katz &  
355 Grant, 2014; Cavalier-Smith et al., 2015). This shifting position between SAR and the  
356 Archaeplastida may reflect that haptophytes diverged at the base of both groups and therefore is  
357 a key group for understanding the origin and evolution of this huge diversity of eukaryotes.

358

### 359 **Resolving Rhizarian Relationships**

360 Within Rhizaria, it has been suspected for some time that Foraminifera and Radiolaria are closely  
361 related, and they have therefore been grouped together as Retaria (Cavalier-Smith 2002, Moreira  
362 et al. 2007, Krabberød et al. 2011, Ishitani et al. 2011, Sierra et al. 2013). In phylogenies based on  
363 ribosomal DNA, Foraminifera groups within radiolarians, although this placement has been  
364 contested based on the aberrant nature of both the small (18S) and large (28S) subunit of  
365 ribosomal genes in Foraminifera (Pawlowski & Burki 2009, Krabberød et al. 2011). Recent  
366 phylogenomic analyses place Foraminifera either within Radiolaria implying Radiolaria to be a  
367 paraphyletic group (Burki et al. 2013, Sierra et al. 2013, 2015) or as sister to Radiolaria (Cavalier-  
368 Smith et al. 2015, Burki et al. 2016). However, these analyses lack two crucial pieces in the puzzle;  
369 representatives from Nassellaria, one of the major polycystine radiolarian orders, and *S. zanglea*,  
370 the only species of Taxopodida. Including both in combined 18S and 28S rDNA phylogenies,  
371 divided the Radiolaria in two main groups, Polycystina and Spasmaria, where the latter contained

372 Taxopodida, but the position of Foraminifera was unresolved (Krabberød et al. 2011). Here, we  
373 have generated transcriptome data and protein sequences from both the missing Radiolaria  
374 groups in our multi-gene analyses, *L. setosa* (Nassellaria) and *S. zanclea* (Taxopodida). In addition,  
375 we have reduced the impact of missing data in earlier phylogenomic analyses (Sierra et al. 2013,  
376 2015, Cavalier-Smith et al. 2015, Burki et al. 2016) by adding genes to Foraminifera and a  
377 substantially larger sampling of other Rhizaria species.

378 Using these data, our analyses always cluster Radiolaria, Foraminifera and Taxopodida into  
379 Retaria. We find that Radiolaria (excluding Taxopodida) is monophyletic (congruent with Cavalier-  
380 Smith et al. 2015). Endomyxa and Retaria form a monophyletic group, revealing Cercozoa as  
381 paraphyletic. But in our multi-gene alignments, as in those of Sierra et al. (2013), data from two  
382 important endomyxean clades (i.e. Haplosporida and Vampyrellida) are absent. However, we  
383 included representatives from the two clades on the ML tree with the Evolutionary Placement  
384 Algorithm (Berger & Stamatakis 2011) and they fall inside the endomyxean clade, strengthening  
385 the monophyly of Retaria and Endomyxa (Figure 14).

386

### 387 **Taxopodida and Endomyxa revealed as sister lineages to Foraminifera and Radiolaria**

388 Taxopodida have previously been placed within Radiolaria (Nikolaev et al. 2004, Krabberød et al.  
389 2011), but has two different positions in our trees dependent on the analysis. The Bayesian  
390 CATGTR trees show Taxopodida as the sister to Radiolaria and Foraminifera, while ML LG place the  
391 species as sister to Radiolaria. We assessed the basis for this discrepancy by running Phylobayes  
392 with the substitution model used in the ML analyses (i.e. the LG model). The resulting Bayesian LG  
393 tree placed Taxopodida as sister to Radiolaria – congruent with the ML tree – clearly  
394 demonstrating the impact of the model on the phylogeny. It should also be noted that removing  
395 fast evolving sites in the ML LG analysis changed the tree correspondingly by placing Taxopodida  
396 at the base of Retaria (Figure 4B). While all the Bayesian inferences were highly congruent, the ML  
397 topologies were less stable and converged towards the Bayesian tree with removal of fast evolving  
398 sites. The stability of the Bayesian results may be due to the use of the CATGTR model which more  
399 realistically estimates the evolutionary substitution patterns in amino acids by taking into account  
400 across site heterogeneities in the amino acid substitution process (Lartillot & Philippe 2004,  
401 Lartillot et al. 2013) and therefore preferable over the LG model.

402

403 All evidence taken into account, Taxopodida most likely diverged early in the radiation of Retaria  
404 and before the separation of Radiolaria and Foraminifera. This has consequences for the  
405 interpretation of the cytoskeleton and morphological evolution of Retaria. Taxopodida and  
406 Acantharia were grouped together as Spasmaria based on the existence of contractile myonemes  
407 in both groups (Cavalier-Smith 1993), a grouping also supported in 18S and 28S rDNA phylogenies  
408 (Krabberød et al. 2011). Myonemes give taxopodidans the ability to swim using their pseudopodia  
409 like oars while giving acantharians the ability to regulate their buoyancy by altering their cell  
410 volume (Cachon et al. 1977, Febvre 1981). However, if Taxopodida is sister to both Radiolaria and  
411 Foraminifera it implies that contractile myonemes and flexible pseudopodia, were an ancestral  
412 trait of Retaria, and have later been lost or modified in Radiolaria and Foraminifera.

413 Endomyxa was originally defined as a clade within Cercozoa (Cavalier-Smith 2002). In our trees,  
414 however, Endomyxa was consistently excluded from the filose Cercozoa in both ML and Bayesian  
415 inferences, and placed as sister to Retaria. Our trees show both Endomyxa and Taxopodida as  
416 sister lineages to Foraminifera and Radiolaria. This means that Rhizaria is split into three lineages:  
417 Filosa, Endomyxa and Retaria. Taxopodida, Foraminifera and Radiolaria constitute Retaria. This  
418 new branching order of rhizarian lineages forms the framework we here use to map changes of  
419 the cytoskeleton-related gene families and establish the order of macroevolutionary changes in  
420 Rhizaria.

421

#### 422 **Expansion of actin, myosin and subfunctionalization of Arp2/3 in Chlorarachniophyta**

423 The chlorarachniophytes can form extensive networks of reticulose actin-based pseudopodia that  
424 they rely on for foraging and movement (Margulis 1990). The evolution of these extensive  
425 pseudopodial networks seems to have been made possible by gene duplications of proteins  
426 controlling actin network dynamics as well as several duplications of the actin gene, and of myosin  
427 specific to chlorarachniophytes. The interaction between actin, the Arp2/3 complex, and myosin is  
428 important for pseudopod formation and branching. Branching points between two actin filaments  
429 are formed as the Arp2/3 complex recruits actin filaments into networks (Volkman et al. 2001,  
430 Goley & Welch 2006, Pollard 2007, Mattila & Lappalainen 2008, Xu et al. 2011). Here we present  
431 evidence for a duplication ancestral to chlorarachniophytes for two of the proteins in the complex:  
432 Arp2 and ARPC1. Both proteins are involved in the initial binding of nucleation promoting factors  
433 (NPFs) that are essential for the formation of protrusions that eventually leads to pseudopodia at  
434 the leading edge of motile cells (Boczkowska et al. 2008, 2014, Xu et al. 2011, Ura et al. 2012, Kast

435 et al. 2015). Although the exact nature and conformation of the Arp2/3 complex are still under  
436 investigation, it seems clear that actin NPFs bind first to Arp2 and ARPC1, then extend the  
437 daughter filament by adding an actin subunit at the barbed end of Arp2 and Arp3 (Boczkowska et  
438 al. 2008, 2014). This in turn creates attachment points for daughter actin filaments to bind to the  
439 existing mother filament (Rouiller et al. 2008). In chlorarachniophytes the Arp2 and ARPC1  
440 paralogs have undergone divergent substitution patterns. The differences between the two Arp2  
441 paralogs as well as the two ARPC1 paralogs are mainly found on the surface areas of the Arp2/3  
442 complex where the actin recruiting proteins, NTPs and ultimately the newly formed actin filaments  
443 attach. Sites that are conserved and shared between both paralogs (marked green in Figure 8) are  
444 most likely important for the original function of the complex, while the sites that are conserved in  
445 one of the paralogs but not the other points to functional differentiation and innovation. In  
446 addition myosin duplications have occurred ancestrally to Rhizaria before several independent  
447 events in chlorarachniophytes and Foraminifera.

448 Over evolutionary time scales these genetic innovations have likely formed the molecular basis of  
449 cellular and morphological differentiation in chlorarachniophytes: In turn, this has given them a  
450 larger repertoire of Arp2 and ARPC1 and an increased potential to recruit actin filaments to  
451 facilitate a reticulate cell and a gliding lifestyle.

452

### 453 **Unique duplication and neofunctionalization of $\alpha$ - and $\beta$ -tubulin in Retaria**

454 Similar to Chlorarachniophytes many species in Retaria and Endomyxa can form highly branched  
455 pseudopodial networks (Anderson 1976a, b, Lee & Anderson 1991, Suzuki & Aita 2011). This is also  
456 reflected in the expansion of actin genes: Retaria has two distinct subfamilies of actin genes, one  
457 grouping with actin homologs from Endomyxa. In Endomyxa the actin diversity is extensive with  
458 three possible paralogs (Figure 4). Unlike Chlorarachniophyta however, Retaria have additional  
459 pseudopods supported by microtubules called axopodia (Anderson 1983, Travis & Bowser 1986,  
460 Lee & Anderson 1991, Suzuki & Aita 2011). The axopodia in Radiolaria are often contractile and  
461 withdraw upon contact; rapid movement can cause prey to be drawn towards the cytoplasm of  
462 the cell where digestion occurs (Sugiyama et al. 2008). Similarly Foraminifera have stiffened  
463 pseudopods called reticulopodia. These microtubule mediated pseudopods can extend and retract  
464 at a speed two orders of magnitude faster than in animal cells (Travis & Allen 1981, Bowser 2002).  
465 The extraordinary speed at which the microtubules can nucleate in Foraminifera has been linked  
466 to a duplication and neo-functionalization of  $\beta$ -tubulin (Habura et al. 2005, Hou et al. 2013). The



467 discovery of the aberrant  $\beta$ 2-tubulin was a paradox, because the corresponding  $\alpha$ -tubulin paralog  
468 of the heterodimer was absent in all Retaria (Hou et al. 2013). The question is how an aberrant  $\beta$ -  
469 tubulin can function without a correspondingly deviant  $\alpha$ -tubulin. Here we solve this paradox by  
470 presenting  $\alpha$ 2-tubulin in the single cell transcriptomes of *Sticholonche zanclea* and *Lithomelissa*  
471 *setosa*, which enabled identification of homologs from other Retarian species. We also add new  $\beta$ -  
472 tubulin data from both *S. zanclea* and *L. setosa*, confirming gene expansion in all major Radiolaria  
473 lineages, and the origin of new paralogs in the common ancestor to Retaria. Interestingly, none of  
474 the  $\alpha$ 2-tubulin and  $\beta$ 2-tubulin paralogs could be identified in available Endomyxa data, suggesting  
475 that these gene duplications are synapomorphic for Retaria, with an origin after Retaria and  
476 Endomyxa diverged (Figure 14).

477 Both the  $\alpha$ 2- and  $\beta$ 2-tubulin genes form distinct phylogenetic clades and diverged from the  
478 conventional  $\alpha$ 1- and  $\beta$ 1-tubulin genes through changes in functionally important residues.  
479 Subsequent to the initial duplication, these paralogs have undergone repeated duplications to  
480 form subgroups of each gene family. These duplications and increased evolutionary rate have  
481 developed both  $\alpha$ 2- and  $\beta$ 2-tubulin as more divergent genes than the conventional  $\alpha$ 1- and  $\beta$ 1-  
482 tubulins.

483 Modelling of evolutionary rates on the tubulin structure shows global changes of the molecule  
484 along two different paths: Firstly, a large number of conserved and functionally important residues  
485 in  $\alpha$ 1 and  $\beta$ 1 have become more variable, and probably therefore less functionally important in  $\alpha$ 2  
486 and  $\beta$ 2. This pattern is particularly clear at the interface between the  $\alpha$  and  $\beta$  heterodimers (which  
487 is the basic unit of protofilaments), and in the lateral surfaces between protofilaments that create  
488 microtubule (i.e. the M-loop, the T3-loop and 8H helix etc.). Secondly, many variable sites localized  
489 outside of the classical contact surfaces in the conventional  $\alpha$ 1 and  $\beta$ 1, have become conserved in  
490  $\alpha$ 2 and  $\beta$ 2 and have probably gained new functional roles. In addition, tracing the evolutionary  
491 rates of all tubulin paralogs show higher evolutionary rate at the interface between the  $\alpha$  and  $\beta$   
492 heterodimers (which are the basic units of protofilaments), and in the lateral surfaces between  
493 protofilaments that create microtubules (i.e. the M-loop, the T3-loop and 8H helix etc.). The  
494 overall pattern is that the new  $\alpha$ 2-tubulin paralog presented here evolved with a similar mode to  
495 that of the  $\beta$ 2-tubulin gene (Habura et al. 2005, Hou et al. 2013).

496 Retaria is unique among eukaryotes in having such divergent tubulin genes. It is not clear how  
497 Retaria combines the four tubulin variants  $\alpha$ 1,  $\alpha$ 2,  $\beta$ 1 and  $\beta$ 2 into heterodimers, but it certainly  
498 enables modularity. We hypothesize that Retaria can assemble four types (type 1-4) of

499 heterodimers; i.e. *type1*:  $\alpha1+\beta1$ , *type2*:  $\alpha1+\beta2$ , *type3*:  $\alpha2+ \beta1$ , *type4*:  $\alpha2+ \beta2$ . These four  
500 heterodimers can function as modules and can be combined to develop protofilaments with  
501 different properties. The different affinities between the  $\alpha$  and  $\beta$  tubulins will certainly affect  
502 assembly and disassembly of microtubules, and may be used to adjust flexibility, strength and  
503 conformation of the axopodia or reticulopodia (Löwe et al. 2001). Retaria is known to develop  
504 elaborate pseudopodia stiffened by bundles of microtubules. The axopodial microtubules in  
505 Taxopodida and Acantharia attach laterally to other microtubules and form multiple hexagonal  
506 rings (Cachon et al. 1973). The microtubules of polycystine radiolarians axopodia on the other  
507 hand form a branching pattern (Cachon & Cachon 1971, Grain 1986). In some Foraminifera (e.g.  
508 *Astrammina*) the microtubules coil tightly around one around another increasing the tensile  
509 strength of the pseudopodia used to capture prey (Lee & Anderson 1991). Having several types of  
510  $\alpha$  and  $\beta$  heterodimers allows a large repertoire of architectural structures to be drawn upon when  
511 forming microtubules. In addition, we observe that many of the sites that have undergone  
512 evolutionary change are located on the surface of the heterodimer. This can be linked to binding  
513 sites for microtubule associated proteins (MAPs) as well as motor proteins further expanding the  
514 range and flexibility of cytoskeletal structures (Brouhard & Rice 2014).

515

## 516 **Single cell transcriptomics for macroevolutionary studies of unculturable protists**

517 Here we have applied single cell transcriptomics as a new approach for phylogenomic  
518 reconstruction of SAR, and the genetic basis of cytoskeleton and morphological evolution in  
519 Rhizaria. Presently single cell transcriptomics has been applied to animal model organisms, such as  
520 cell differentiation studies in mouse (Liang et al. 2014, Liu et al. 2014). To date, the only  
521 application on protists has been on single cells grown from culture, confirming that the method  
522 gives comparable results to that of sequencing many thousand cells (Kolisko et al. 2014). Although  
523 single cell transcriptomic studies from cultured cells confirm the approach, they do not address  
524 how efficient the method works on free-living protists, with highly divergent cell types, from  
525 natural samples.

526

527 One of the main challenges of applying single cell transcriptomics to protists is the optimization of  
528 cell lysis. This is emphasized when studying species with rigid skeletons and tough cell walls. Here  
529 we modified lysis procedures for single cell transcriptomics (Picelli et al. 2014). Radiolaria species

530 have a tough cellular wall that protects the endoplasm; successful lysis demonstrates how the  
531 method can be applied to less hardy unicellular species. The number of predicted genes from our  
532 single cell transcriptomes are comparable to that generated from colonies, or pooling of hundreds  
533 of cells from other Radiolarian species (Burki et al. 2010, Balzano et al. 2015). Subsampling of  
534 sequence reads showed sufficient sequencing depth, suggesting that an incomplete transcriptome  
535 was likely due to stochastic loss of mRNA. Despite these challenges we have shown that  
536 transcriptomes of sufficient quality for phylogenomic and molecular evolutionary analyses can be  
537 generated from single cells isolated from natural samples. This protocol can undoubtedly be  
538 applied to other uncultivable protists, adding resolution to the relationships between eukaryotes,  
539 in addition to revealing the evolution of morphologically related genes.

540

#### 541 **Morphological diversification by lineage specific innovation of cytoskeleton genes in Rhizaria**

542 Data generated from these transcriptomes demonstrate that genetic innovation through multiple  
543 gene duplication and neo-functionalization processes, rather than co-option of deep gene  
544 homologs, have taken place in cytoskeletal genes of Chlorarachniophyta and Retaria. Differential  
545 expansion of genes in chlorarachniophytes and Retaria show that underlying genetic changes to  
546 cytoskeletal evolution have taken different routes in morphologically distinct groups; the overall  
547 pattern of the data reveals extensive gene duplications of actin-related proteins in  
548 chlorarachniophytes and of  $\alpha$ - and  $\beta$ -tubulins in Retaria, with group specific expansions of myosin  
549 in both groups (Figure 14). The hypothesized connection between the evolutionary changes to  
550 cytoskeletal genes and the cellular morphology of the cells suggest that genetic innovations  
551 occurred in the ancestor of the respective groups, subsequently forming the basis for  
552 morphological and species diversification. While the actin-related proteins, and the myosin motor  
553 proteins that use them have driven changes in chlorarachniophytes; tubulin has directed central  
554 components of Retaria evolution. Subsequent to the initial innovation, additional expansions of  
555 functional genes crucial to cytoskeletal formation have impacted on the morphological  
556 diversification of Chlorarachniophyta and Retaria. Our analyses elucidate relationships between  
557 genotype and phenotype of these organisms, linking gene evolution to evolution of cell  
558 morphology. Better understanding of macroevolution in these organisms will require functional  
559 studies of what types of actin branching the new Arps can form in chlorarachniophytes and how  
560 Retaria combine the two sets of  $\alpha$  and  $\beta$  tubulin proteins in their protofilaments. Such studies  
561 should be complemented with more data from other gene families known to be involved in

562 cytoskeleton development, regulation, and transportation, such as MAPs, GTPases, dynein and  
563 kinesin (Hammer & Wu 2002, Kollmar et al. 2012, Rojas et al. 2012, Brouhard & Rice 2014), .  
564 Using the transcriptome data, we addressed uncertainties in the phylogeny of SAR by  
565 phylogenomic analyses of supermatrices and by identification of synapomorphic gene  
566 duplications. The phylogenomic analyses strongly support Rhizaria as sister to Stramenopiles and  
567 Alveolates, and reveal Endomyxa and Taxopodida as two sister lineages to Foraminifera and  
568 Radiolaria, with the latter two being divided into two distinct clades. Foraminifera is not placed  
569 within Radiolaria as earlier reported (Krabberød et al. 2011, Sierra et al. 2013, 2015). In addition,  
570 we identified independent synapomorphic gene duplications characters on several taxonomic  
571 levels in Rhizaria, including a myosin family unique to Rhizaria. The actin-2 paralog of  
572 Foraminifera, Radiolaria and Taxopodida is shared with Endomyxa, arguing for the grouping of  
573 Endomyxa with Retaria, instead of being placed within Cercozoa. However, Retaria is divided from  
574 Endomyxa by the Retaria-specific  $\alpha 2$  and  $\beta 2$  tubulin synapomorphies. The duplication of genes in  
575 the Arp2/3 complex is a synapomorphy for Chlorarachniophyta. Altogether the phylogenomic  
576 trees and synapomorphic gene-duplications shown here, form a new framework for future  
577 revisions of the classification of SAR and Rhizaria. In total, we demonstrate single cell  
578 transcriptomics as a promising approach for inclusion of a larger diversity of uncultured protists in  
579 macroevolutionary studies and phylogenomic inferences.

580

## 581 **Methods:**

### 582 **Sampling and transcriptome amplification**

583 Plankton samples were collected from the inner part of the Oslo fjord (May 2014) using a net haul  
584 with mesh size of 60  $\mu\text{m}$ . The seawater samples were stored overnight in an incubator holding the  
585 same temperature as the fjord to let living cells recover and self-clean. Radiolarian cells were  
586 manually extracted from the plankton samples by capillary isolation with Pasteur pipettes and an  
587 inverted microscope. Cells were individually photographed and then thoroughly washed in sterile  
588 PBS to remove possible surface contamination (Figure 1). Immediately following isolation, cells  
589 were placed in Nucleospin RNA XS lysis buffer (Macherey-Nagel) and processed further. Total RNA  
590 was isolated from the free-living Radiolarian cells using Nucleospin RNA XS (Macherey-Nagel)  
591 following standard protocol, with on-column DNase treatment and eluting with 5 $\mu\text{l}$  elution buffer.  
592 Hybridization of oligo(dT) primer, reverse transcription, template switching and PCR amplification  
593 of cDNA were performed by modification of a protocol outlined in (Picelli et al. 2014) called Smart-  
594 seq2; we used 7  $\mu\text{l}$  of mRNA mix (5  $\mu\text{l}$  isolated RNA, 1  $\mu\text{l}$  oligo(dT) primer and 1  $\mu\text{l}$  10 mM dNTPs)  
595 which was added to 9  $\mu\text{l}$  of reverse transcriptase (RT) mix). All 16  $\mu\text{l}$  (mRNA+RT mix) was used for  
596 PCR amplification (adjusting concentrations accordingly) employing 20 cycles. The quality and  
597 integrity of the resulting cDNA were confirmed using a Bioanalyzer (Agilent) with a high-sensitivity  
598 DNA chip, in addition to visualization on a 1% TAE gel. cDNA concentration was confirmed using a  
599 Qubit fluorometer (Life Technologies) and the dsDNA HS assay kit.

600

### 601 **Sequencing and assembly**

602 Library preparation and sequencing of the cDNA with Illumina MiSeq were performed at the  
603 Natural History Museum in London. The sample was prepared using the Illumina TruSeq Nano  
604 DNA LT Library Preparation Kit (FC-121-4001). The standard Illumina protocol was followed with  
605 fragmentation on a Covaris M220 Focused-ultrasonicator. The finished library was quality checked  
606 using an Agilent Tapestation to check the size of the library fragments, and a qPCR in a Corbett  
607 RotorGene instrument to quantify the library. This was repeated for two MiSeq 600 cycle runs,  
608 2\*300 cycle paired end sequencing. The MiSeq platform was chosen over HiSeq since the longer  
609 reads would provide an easier assembly when dealing with a possible metatranscriptomic library.  
610 The raw reads (19,894,654 for *S. zanclea* and 11,590,658 for *L. setosa*) were quality filtered and

611 pairwise assembled with PEAR (Zhang et al. 2013) using default parameters. The reads were  
612 further cleaned with Trimmomatic (Bolger et al. 2014) and then *de novo* assembled into contigs  
613 with Trinity (Haas et al. 2013) using default settings. TransDecoder in the Trinity package was used  
614 to predict genes from the assembled cDNA (Haas et al. 2013).

615

616 To check if all transcripts in the library had been sequenced, the raw reads were randomly split up  
617 in 10 different datasets representing 10%, 20%, up to 90% of the original raw reads. The sub-  
618 sampled datasets were assembled and new gene predictions were independently performed using  
619 PEAR, Trimmomatic and Trinity as for the full dataset. Accumulation curves obtained by plotting  
620 the predicted gene number against increasing partition size show that the slope of the curves  
621 decrease with increasing partition size and more or less flattens when it reaches 100% of the total  
622 dataset for both libraries (Figure 1 – figure supplement 1). We therefore assume that acceptable  
623 sequencing depth for each library has been achieved, and that a further sequencing effort would  
624 not have increased the number of predicted genes significantly.

625

## 626 **Alignment construction, paralog identification, and phylogenetic inference**

627 **The BIR pipeline:** We used the BIR pipeline ([www.bioportal.no](http://www.bioportal.no); Kumar *et al.*, 2015) to extract  
628 genes and prepare single gene alignments to be used in multi-gene phylogenetic analyses. As seed  
629 alignments for the BIR pipeline we used 258 genes previously published in multi-gene phylogenies  
630 (Burki et al. 2012). As a query database we used the generated transcripts from our single cell  
631 transcriptomes (6898 in total), all proteins in GenBank with Rhizaria as TaxID (44278 sequences at  
632 the time of retrieval, October 2014), all 16 transcriptomes assigned to Rhizaria from the Marine  
633 Microbial Eukaryote Transcriptome Sequencing Project (MMETSP; Keeling et al., 2014. See table 1)  
634 , as well as all Rhizarian sequences from Sierra et al., (2013). In addition seven reference genomes  
635 are included in the BIR pipeline (*Arabidopsis thaliana*, *Bigeloviella natans*, *Dictyostelium*  
636 *discoideum*, *Guillardia theta*, *Homo sapiens*, *Monosiga brevicollis*, *Naegleria gruberi*, *Paramecium*  
637 *tetraurelia*, *Saccharomyces cerevisiae* and *Thalassiosira pseudonana* (Kumar et al. 2015). In short  
638 the BIR pipeline will screen the query sequences against the database consisting of one or more  
639 seed alignments, using BLAST, and assign the sequences that match the criteria set by the user to  
640 the corresponding alignment (for details see Kumar et al., (2015)).

641

642 **Single gene analyses:** Maximum Likelihood (ML) trees for all single genes were constructed with  
643 RAxML v 8.0.2, with the program calculating the best fitting model for each gene (the option -m  
644 PROTGAMMAAUTO), and with the automatic bootstrapping criteria MRE (option -l autoMRE)  
645 (Pattengale et al. 2010, Stamatakis 2014). The Tree Certainty index (Salichos et al. 2014) was  
646 calculated for each tree separately, and all trees were run through a custom made R script to see  
647 whether the following clades were monophyletic or not: Opisthokonta, Fungi, Alveolata,  
648 Stramenopiles, Haptophyta, Rhizaria, Viridiplantae, Excavata, Fungi and Rhodophyta. This allowed  
649 us to screen for genes containing artefacts and dubious sequences such as sequences that had  
650 been assigned to the wrong species, sequences that originated from contamination and possible  
651 paralogs. Three genes ( $\beta$ -tubulin, actin and rac1) were found to have paralogs and deemed not  
652 suitable for multi-gene phylogenies. We therefore proceeded with 255 genes for the multi-gene  
653 analysis.

654

655 **Supermatrix construction:** After screening we were left with 255 genes that were concatenated  
656 using ScaFos (Roure et al. 2007). We also merged close species into composite sequences when  
657 they covered different parts of the supermatrix (see table S2). The final matrix had a length of  
658 54,898 amino acids with 124 taxa.

659

660 **Removal of jumping and long branched taxa:** *Mikrocytos mackini* was not included in the analysis  
661 due to an extremely long branch (Burki et al. 2013) and RogueNaRok, using default parameters  
662 (Aberer et al. 2013) was used to identify jumping taxa, which also were excluded from further  
663 analysis (Supplementary table S2)

664

665 **Reduced dataset:** We also constructed a concatenated dataset consisting of 146 representative  
666 genes for easier and faster analysis. The selection of genes were made to meet several criteria: we  
667 excluded genes that had less than 45 taxa (50% of the inferred taxa), a low relative Tree Certainty  
668 index (Salichos et al. 2014), or that failed to group at least two of the major clades mentioned  
669 above.

670

671 **Missing data:** To assess the impact of missing data we excluded taxa with low coverage in  
672 increments from the two concatenated dataset. First we set the lowest allowed percentage of

673 missing data for a taxon to be 10% of the total characters (i.e. if a taxon had more than 90% data  
674 missing it was excluded), the next cut-off at 20%, and finally at 30%. The number of characters in  
675 the matrix was held constant. The Tree Certainty index (Salichos et al. 2014) was calculated for  
676 each increment see supplementary table S2 and S3 for details. The relative Tree Certainty index  
677 increased markedly when the threshold was set at 90%, but did not increase significantly after  
678 that, in fact there seem to be a decrease in the relative TC value as the number of taxa drops  
679 (Supplementary table S1).

680 **Influence of taxa with low coverage, or uncertain position:** we also remove taxa and clades from  
681 Rhizaria that had a consistently low bootstrap value (< 75%) or low posterior probability (< 75 pp),  
682 but that had not been flagged by RogueNaRok to see if they affected the topology of the  
683 phylogenetic inference. *Spongosphaera streptacantha* and *Sticholonche zanclea* were removed  
684 one by one and together from both the full and the reduced dataset. Foraminifera were also  
685 removed in analyses (see table S3).

686 **Removal of fast evolving sites:** TIGER (Cummins & McInerney 2011) was used with default  
687 settings to produce categories of fast evolving sites, 10 categories in total for each dataset.  
688 Categories of fast evolving sites were removed in increments, starting with the category with the  
689 fastest evolving sites, subsequently removing the category with the second fastest evolving sites  
690 etc. Up to 4 categories were removed from all datasets before phylogenetic analyses.

691 **Phylogenetic analyses:** Phylogenetic trees were inferred for all concatenated datasets, with  
692 RAxML choosing the best fitting model, and with the automatic bootstrapping criteria as  
693 previously described. The preferred model was always LG+ $\Gamma$  (see supplementary table S3). Due to  
694 the heavy demand on computational resources from Bayesian inference only six of the alignments  
695 were included for analysis with the CATGTR model in Phylobayes MPI version 1.5a (Lartillot et al.  
696 2013), as well as 1 dataset with the LG model. For these we ran 2 chains in parallel for at least  
697 15.000 iteration only stopping when the maxdiff was >0.3 (see supplementary table S3).

698 **Evolutionary Placement Algorithm:** In order to place rhizarian species that had been excluded  
699 when the cut-off threshold for missing data had been raised on the phylogenetic tree we used the  
700 Evolutionary Placement Algorithm (EPA) included in RAxML 8.0.26 (Stamatakis et al. 2010, Berger  
701 et al. 2011, Stamatakis 2014). As reference tree we used the 255-gene maximum likelihood tree  
702 with a 10% missing data cut off.



## 703 **Genes related to cytoskeleton formation and motor proteins**

704 The assembled transcriptomes from the single cells were annotated with InterProscan 5 (Jones et  
705 al. 2014) as implemented in Geneious 8 (Kearse et al. 2012). The annotations were screened for  
706 genes commonly involved in the formation and development of the cytoskeleton, as well as the  
707 most common motor proteins using the cytoskeleton. In particular we looked for  $\alpha$ - and  $\beta$ -tubulin,  
708 myosin, actin, the actin regulating Arp2/3-complex consisting of seven actin-related proteins  
709 (arp2, arp3, ARPC1, ARPC2, ARPC3, ARPC4 and ARPC5). Reference alignments and sequences were  
710 downloaded from PFAM (<http://pfam.xfam.org/>), as well as relevant other recently published  
711 alignments (Hou et al. 2013, Seb e-Pedr os et al. 2014, Cavalier-Smith et al. 2015) and used in BIR  
712 as seed alignments with the same query database as before. In addition representatives for all the  
713 genes were blasted against 6 additional non-rhizarian transcriptomes from MMETSP  
714 (MMETSP0039 *Eutreptiella gymnastica*, MMETSP0046 *Guillardia theta*, MMETSP0308 *Gloeochaete*  
715 *wittrockiana*, MMETSP0380 *Alexandrium tamarense*, MMETSP0902 *Thalassiosira Antarctica*, and  
716 MMETSP1150 *Emiliana huxleyi*), as well as against the non-redundant protein database in  
717 GenBank. For each gene ML trees were constructed with RAxML as before, and manually curated  
718 for any confounding artefacts. Redundant and short sequences were manually removed in  
719 Geneious 8 (Kearse et al. 2012) before another round of ML analysis with RAxML and a Bayesian  
720 analysis with the CATGTR model implemented in Phylobayes MPI version 1.5a (Lartillot et al.  
721 2013). Comparative evolutionary analyses of tubulin and the duplicated genes in the Arp2/3  
722 complex were performed by examining the evolutionary rates of the paralogs separately and then  
723 mapping the genes to structural models using Consurf (Ashkenazy et al. 2010, Celniker et al. 2013).  
724 InterPro annotations of functional domains of myosin was performed with InterProscan 5 (Jones  
725 et al. 2014, Mitchell et al. 2015).

726

727 All sequences from *S. zanclea* and *L. setosa* used in this study have been deposited in GenBank  
728 with accession numbers (xxxx-xxxx). All data, alignments, and trees can be downloaded from  
729 [www.bioportal.no](http://www.bioportal.no).

## 730 **Acknowledgment**

731 We would like to thank Bente Edvardsen, UiO, for providing the plankton haul from which the  
732 sampled cells were isolated, the Sequencing centre at Natural History Museum in London for

733 performing the Illumina library preparations and sequencing. We would also like to thank Simon  
734 Picelli for answering questions related to the Smart-seq2 method, Fabien Burki for providing single  
735 gene alignments and The Gordon and Betty Moore Foundation for making all those wonderful  
736 protists transcriptomes available for the public. All analyses were run either on the Abel  
737 supercomputer at The High Performance Computing cluster at University Of Oslo, or on Lifeportal  
738 ([www.lifeportal.uio.no](http://www.lifeportal.uio.no)). For more information on BIR see [www.bioportal.no](http://www.bioportal.no). This project was  
739 funded by University of Oslo. This work was supported by grants from University of Oslo and from  
740 Research Council of Norway to Shalchian-Tabrizi (NFR216475).

741

## 742 **References**

- 743 Aberer AJ, Krompass D, Stamatakis A (2013) Pruning rogue taxa improves phylogenetic accuracy: An efficient  
744 algorithm and webservice. *Syst Biol* 62:162–166
- 745 Anderson OR (1976a) Fine structure of a collodarian radiolarian (*Sphaerozoum punctatum* Müller 1858) and  
746 cytoplasmic changes during reproduction. *Mar Micropaleontol* 1:287–297
- 747 Anderson OR (1976b) Ultrastructure of a colonial radiolarian *collozoum inerme* and a cytochemical determination of  
748 the role of its zooxanthellae. *Tissue Cell* 8:195–208
- 749 Anderson OR (1978) Light and electron microscopic observations of feeding behavior, nutrition, and reproduction in  
750 laboratory cultures of *Thalassicolla nucleata*. *Tissue Cell* 10:401–12
- 751 Anderson OR (1983) *Radiolaria*, 2nd edn. Springer-Verlag, New York, USA
- 752 Ashkenazy H, Erez E, Martz E, Pupko T, Ben-Tal N (2010) ConSurf 2010: Calculating evolutionary conservation in  
753 sequence and structure of proteins and nucleic acids. *Nucleic Acids Res* 38
- 754 Balzano S, Corre E, Decelle J, Sierra R, Wincker P, Silva C, Poulain J, Pawlowski J, Not F (2015) Transcriptome analyses  
755 to investigate symbiotic relationships between marine protists. *Front Microbiol* 6:98: 1–14
- 756 Bass D, Chao EE-Y, Nikolaev S, Yabuki A, Ishida K-I, Berney C, Pakzad U, Wylezich C, Cavalier-Smith T (2009) Phylogeny  
757 of novel naked Filose and Reticulose Cercozoa: Granofilosea cl. n. and Proteomyxidea revised. *Protist* 160:75–  
758 109
- 759 Berger S a., Krompass D, Stamatakis A (2011) Performance, accuracy, and Web server for evolutionary placement of  
760 short sequence reads under maximum likelihood. *Syst Biol* 60:291–302
- 761 Berger SA, Stamatakis A (2011) Aligning short reads to reference alignments and trees. *Bioinformatics* 27:2068–75
- 762 Boczkowska M, Rebowski G, Kast DJ, Dominguez R (2014) Structural analysis of the transitional state of Arp2/3  
763 complex activation by two actin-bound WCAs. *Nat Commun* 5:3308
- 764 Boczkowska M, Rebowski G, Petoukhov M V., Hayes DB, Svergun DI, Dominguez R (2008) X-ray scattering study of  
765 activated Arp2/3 complex with bound actin-WCA. *Structure* 16:695–704
- 766 Bolger AM, Lohse M, Usadel B (2014) Trimmomatic: A flexible trimmer for Illumina sequence data. *Bioinformatics*  
767 30:2114–2120
- 768 Bowser SS (2002) Reticulopodia: Structural and Behavioral Basis for the Suprageneric Placement of Granuloreticulosan  
769 Protists. *J Foraminifer Res* 32:440–447
- 770 Brouhard GJ, Rice LM (2014) The contribution of  $\alpha\beta$ -tubulin curvature to microtubule dynamics. *J Cell Biol* 207:323–  
771 334
- 772 Brown MW, Kolisko M, Silberman JD, Roger AJ (2012) Aggregative multicellularity evolved independently in the  
773 eukaryotic supergroup Rhizaria. *Curr Biol* 22:1123–1127
- 774 Burki F, Corradi N, Sierra R, Pawlowski J, Meyer GR, Abbott CL, Keeling PJ (2013) Phylogenomics of the intracellular

- 775 parasite *Mikrocytos mackini* reveals evidence for a mitosome in Rhizaria. *Curr Biol* 23:1–7
- 776 Burki F, Kaplan M, Tikhonenkov D V, Zlatogursky V, Minh BQ, Radaykina L V, Smirnov A, Mylnikov P, Keeling PJ, Keeling  
777 PJ (2016) Untangling the early diversification of eukaryotes : a phylogenomic study of the evolutionary origins of  
778 Centrohelida , Haptophyta and Cryptista. :1–10
- 779 Burki F, Keeling PJ (2014) Rhizaria. *Curr Biol* 24:R103–R107
- 780 Burki F, Kudryavtsev A, Matz M V, Aglyamova G V, Bulman S, Fiers M, Keeling PJ, Pawlowski J (2010) Evolution of  
781 Rhizaria: new insights from phylogenomic analysis of uncultivated protists. *BMC Evol Biol* 10:377
- 782 Burki F, Okamoto N, Pombert J-F, Keeling PJ (2012) The evolutionary history of haptophytes and cryptophytes:  
783 phylogenomic evidence for separate origins. *Proc R Soc B Biol Sci* 279:2246–2254
- 784 Burki F, Shalchian-Tabrizi K, Minge M, Skjaeveland A, Nikolaev SI, Jakobsen KS, Pawlowski J (2007) Phylogenomics  
785 reshuffles the eukaryotic supergroups. *PLoS One* 2:e790
- 786 Burki F, Shalchian-Tabrizi K, Pawlowski J (2008) Phylogenomics reveals a new “megagroup” including most  
787 photosynthetic eukaryotes. *Biol Lett* 4:366–9
- 788 Cachon J, Cachon M (1971) Le system axopodial des Radiolaires Nassellaires. *Arch für Protistenkd* 113:80–97
- 789 Cachon J, Cachon M, Febvre-Chevalier C, Febvre J (1973) Determinisme de l’edification des systemes microtubulaires  
790 stereoplasmiques d’Actinopodes. *Arch für Protistenkd* 115:137–153
- 791 Cachon J, Cachon M, Tilney LG, Tilney MS (1977) Movement generated by interactions between the dense material at  
792 the ends of microtubules and non-actin-containing microfilaments in *Sticholonche zancolea*. *J Cell Biol* 72:314–  
793 338
- 794 Cavalier-Smith T (1993) Kingdom Protozoa and its 18 phyla. *Microbiol Rev* 57:953–994
- 795 Cavalier-Smith T (2002) The phagotrophic origin of eukaryotes and phylogenetic classification of Protozoa. *Int J Syst*  
796 *Evol Microbiol* 52:297–354
- 797 Cavalier-Smith T (2009) Megaphylogeny, cell body plans, adaptive zones: causes and timing of eukaryote basal  
798 radiations. *J Eukaryot Microbiol* 56:26–33
- 799 Cavalier-Smith T, Chao EE, Lewis R (2015) Multiple origins of Heliozoa from flagellate ancestors: New cryptist  
800 subphylum Corbihelia, superclass Corbistoma, and monophyly of Haptista, Cryptista, Hacrobia and Chromista.  
801 *Mol Phylogenet Evol* 93:331–362
- 802 Cavalier-Smith T, Guy L, Saw JH, Ettema TJG, Eme L, Sharpe SC, Brown MW, Irimia M, Roy SW (2014) The neomuran  
803 revolution and phagotrophic origin of eukaryotes and cilia in the light of intracellular coevolution and a revised  
804 Tree of Life. *Cold Spring Harb Perspect Biol* 6:a016006–a016006
- 805 Celniker G, Nimrod G, Ashkenazy H, Glaser F, Martz E, Mayrose I, Pupko T, Ben-Tal N (2013) ConSurf: Using  
806 evolutionary data to raise testable hypotheses about protein function. *Isr J Chem* 53:199–206
- 807 Cummins C a, Mclnerney JO (2011) A method for inferring the rate of evolution of homologous characters that can  
808 potentially improve phylogenetic inference, resolve deep divergence and correct systematic biases. *Syst Biol*  
809 60:833–844

- 810 Dustin P (1984) *Microtubules*, 2nd edn. Springer-Verlag, Berlin
- 811 Febvre J (1981) The myoneme of the Acantharia (Protozoa): A new model of cellular motility. *Biosystems* 14:327–336
- 812 Finn RD, Bateman A, Clements J, Coggill P, Eberhardt RY, Eddy SR, Heger A, Hetherington K, Holm L, Mistry J,  
813 Sonnhammer ELL, Tate J, Punta M (2014) Pfam: the protein families database. *Nucleic Acids Res* 42:D222–30
- 814 Giannone G, Dubin-Thaler BJ, Rossier O, Cai Y, Chaga O, Jiang G, Beaver W, Döbereiner H-G, Freund Y, Borisy G, Sheetz  
815 MP (2007) Lamellipodial actin mechanically links myosin activity with adhesion-site formation. *Cell* 128:561–75
- 816 Goldstein LS (2001) Molecular motors: from one motor many tails to one motor many tales. *Trends Cell Biol* 11:477–  
817 82
- 818 Goley ED, Welch MD (2006) The ARP2/3 complex: an actin nucleator comes of age. *Nat Rev Mol Cell Biol* 7:713–726
- 819 Grain J (1986) The cytoskeleton in protists: nature, structure, and functions. *Int Rev Cytol* 104:153–249
- 820 Haas BJ, Papanicolaou A, Yassour M, Grabherr M, Blood PD, Bowden J, Couger MB, Eccles D, Li B, Lieber M, Macmanes  
821 MD, Ott M, Orvis J, Pochet N, Strozzi F, Weeks N, Westerman R, William T, Dewey CN, Henschel R, Leduc RD,  
822 Friedman N, Regev A (2013) De novo transcript sequence reconstruction from RNA-seq using the Trinity  
823 platform for reference generation and analysis. *Nat Protoc* 8:1494–1512
- 824 Habura A, Wegener L, Travis JL, Bowser SS (2005) Structural and functional implications of an unusual foraminiferal  
825 beta-tubulin. *Mol Biol Evol* 22:2000–2009
- 826 Hammer J a., Wu XS (2002) Rabs grab motors: Defining the connections between Rab GTPases and motor proteins.  
827 *Curr Opin Cell Biol* 14:69–75
- 828 He D, Sierra R, Pawlowski J, Baldauf SL (2016) Reducing long-branch effects in multi-protein data uncovers a close  
829 relationship between Alveolata and Rhizaria. *Mol Phylogenet Evol*
- 830 Hou Y, Sierra R, Bassen D, Banavali NK, Habura A, Pawlowski J, Bowser SS (2013) Molecular evidence for  $\beta$ -tubulin  
831 neofunctionalization in Retaria (Foraminifera and Radiolarians). *Mol Biol Evol* 30:2487–2493
- 832 Ishida KI, Yabuki A, Ota S (2011) Research note: *Amorphochlora amoebiformis* gen. et comb. nov.  
833 (*Chlorarachniophyceae*). *Phycol Res* 59:52–53
- 834 Ishitani Y, Ishikawa S, Inagaki Y, Tsuchiya M, Takishita K (2011) Multigene phylogenetic analyses including diverse  
835 radiolarian species support the “Retaria” hypothesis - the sister relationship of Radiolaria and Foraminifera. *Mar*  
836 *Micropaleontol* 81:32–42
- 837 Jékely G (ed) (2007) *Eukaryotic Membranes and Cytoskeleton*. Springer New York, New York, NY
- 838 Jones P, Binns D, Chang HY, Fraser M, Li W, McAnulla C, McWilliam H, Maslen J, Mitchell A, Nuka G, Pesseat S, Quinn  
839 AF, Sangrador-Vegas A, Scheremetjew M, Yong SY, Lopez R, Hunter S (2014) InterProScan 5: Genome-scale  
840 protein function classification. *Bioinformatics* 30:1236–1240
- 841 Karcher RL, Deacon SW, Gelfand VI (2002) Motor-cargo interactions: The key to transport specificity. *Trends Cell Biol*  
842 12:21–27
- 843 Kast DJ, Zajac AL, Holzbaaur ELF, Ostap EM, Dominguez Correspondence R, Dominguez R (2015) WHAMM Directs the  
844 Arp2/3 Complex to the ER for Autophagosome Biogenesis through an Actin Comet Tail Mechanism. *Curr Biol*

- 845 25:1791–1797
- 846 Katz L a (2012) Origin and Diversification of Eukaryotes. *Annu Rev Microbiol*:411–427
- 847 Katz LA, Grant JR (2014) Taxon-rich phylogenomic analyses resolve the eukaryotic Tree of Life and reveal the power of  
848 subsampling by sites. *Syst Biol* 64:406–415
- 849 Kearse M, Moir R, Wilson A, Stones-Havas S, Cheung M, Sturrock S, Buxton S, Cooper A, Markowitz S, Duran C, Thierer  
850 T, Ashton B, Meintjes P, Drummond A (2012) Geneious Basic: An integrated and extendable desktop software  
851 platform for the organization and analysis of sequence data. *Bioinformatics* 28:1647–1649
- 852 Keeling PJ, Burki F, Wilcox HM, Allam B, Allen EE, Amaral Zettler L, Armbrust EV, Archibald JM, Bharti AK, Bell CJ,  
853 Beszteri B, Bidle KD, Cameron CT, Campbell L, Caron D a., Cattolico RA, Collier JL, Coyne K, Davy SK, Deschamps  
854 P, Dyhrman ST, Edvardsen B, Gates RD, Gobler CJ, Greenwood SJ, Guida SM, Jacobi JL, Jakobsen KS, James ER,  
855 Jenkins B, John U, Johnson MD, Juhl AR, Kamp A, Katz L a., Kiene R, Kudryavtsev A, Leander BS, Lin S, Lovejoy C,  
856 Lynn D, Marchetti A, McManus G, Nedelcu AM, Menden-Deuer S, Miceli C, Mock T, Montresor M, Moran MA,  
857 Murray S, Nadathur G, Nagai S, Ngam PB, Palenik B, Pawlowski J, Petroni G, Piganeau G, Posewitz MC, Rengefors  
858 K, Romano G, Rumpho ME, Ryneerson T, Schilling KB, Schroeder DC, Simpson AGB, Slamovits CH, Smith DR,  
859 Smith GJ, Smith SR, Sosik HM, Stief P, Theriot E, Twary SN, Umale PE, Vaultot D, Wawrik B, Wheeler GL, Wilson  
860 WH, Xu Y, Zingone A, Worden AZ (2014) The Marine Microbial Eukaryote Transcriptome Sequencing Project  
861 (MMETSP): illuminating the functional diversity of eukaryotic life in the oceans through transcriptome  
862 sequencing (RG Roberts, Ed.). *PLoS Biol* 12:e1001889
- 863 Kolisko M, Boscaro V, Burki F, Lynn DH, Keeling PJ (2014) Single-cell transcriptomics for microbial eukaryotes. *Curr Biol*  
864 24:R1081–R1082
- 865 Kollmar M, Lbik D, Enge S (2012) Evolution of the eukaryotic ARP2/3 activators of the WASP family: WASP, WAVE,  
866 WASH, and WHAMM, and the proposed new family members WAWH and WAML. *BMC Res Notes* 5:88
- 867 Krabberød AK, Bråte J, Dolven JK, Ose RF, Klaveness D, Kristensen T, Bjørklund KR, Shalchian-Tabrizi K (2011)  
868 Radiolaria Divided into Polycystina and Spasmaria in Combined 18S and 28S rDNA Phylogeny. *PLoS One*  
869 6:e23526
- 870 Kumar S, Krabberød AK, Neumann RS, Michalickova K, Zhang X, Zhao S, Shalchian-Tabrizi K (2015) BIR Pipeline for  
871 Preparation of Phylogenomic Data. *Evol Bioinforma* 11:79–83
- 872 Lartillot N, Philippe H (2004) A Bayesian mixture model for across-site heterogeneities in the amino-acid replacement  
873 process. *Mol Biol Evol* 21:1095–1109
- 874 Lartillot N, Rodrigue N, Stubbs D, Richer J (2013) Phylobayes mpi: Phylogenetic reconstruction with infinite mixtures of  
875 profiles in a parallel environment. *Syst Biol* 62:611–615
- 876 Lee JJ, Anderson OR (Eds) (1991) *Biology of Foraminifera*. Academic Press, London, UK, London
- 877 Liang J, Cai W, Sun Z (2014) Single-Cell sequencing technologies: current and future. *J Genet Genomics* 41:513–528
- 878 Liu N, Liu L, Pan X (2014) Single-cell analysis of the transcriptome and its application in the characterization of stem  
879 cells and early embryos. *Cell Mol Life Sci* 71:2707–2715
- 880 Löwe J, Li H, Downing KH, Nogales E (2001) Refined structure of alpha beta-tubulin at 3.5 Å resolution. *J Mol Biol*

- 881 313:1045–1057
- 882 Margulis L (1990) Handbook of protozoa : the structure, cultivation, habitats, and life histories of the eukaryotic  
883 microorganisms and their descendants exclusive of animals, plants and fungi : a guide to the algae, ciliates,  
884 foraminifera, sporozoa, water molds, slime m (L Margulis, Ed.). Jones and Bartlett Publishers, Boston
- 885 Mattila PK, Lappalainen P (2008) Filopodia: molecular architecture and cellular functions. *Nat Rev Mol Cell Biol* 9:446–  
886 454
- 887 Mitchell A, Chang HY, Daugherty L, Fraser M, Hunter S, Lopez R, McAnulla C, McMenamin C, Nuka G, Pesseat S,  
888 Sangrador-Vegas A, Scheremetjew M, Rato C, Yong SY, Bateman A, Punta M, Attwood TK, Sigrist CJA, Redaschi  
889 N, Rivoire C, Xenarios I, Kahn D, Guyot D, Bork P, Letunic I, Gough J, Oates M, Haft D, Huang H, Natale DA, Wu  
890 CH, Orengo C, Sillitoe I, Mi H, Thomas PD, Finn RD (2015) The InterPro protein families database: The  
891 classification resource after 15 years. *Nucleic Acids Res* 43:D213–D221
- 892 Mogilner A, Keren K (2009) The Shape of Motile Cells. *Curr Biol* 19:R762–R771
- 893 Moreira D, Heyden S von der, Bass D, López-García P, Chao E, Cavalier-Smith T (2007) Global eukaryote phylogeny:  
894 Combined small- and large-subunit ribosomal DNA trees support monophyly of Rhizaria, Retaria and Excavata.  
895 *Mol Phylogenet Evol* 44:255–266
- 896 Nikolaev SI, Berney C, Fahrni JF, Bolivar I, Polet S, Mylnikov AP, Aleshin V V, Petrov NB, Pawlowski J (2004) The twilight  
897 of Heliozoa and rise of Rhizaria, an emerging supergroup of amoeboid eukaryotes. *Proc Natl Acad Sci U S A*  
898 101:8066–8071
- 899 Parfrey LW, Grant J, Tekle YI, Lasek-Nesselquist E, Morrison HG, Sogin ML, Patterson DJ, Katz L a (2010) Broadly  
900 sampled multigene analyses yield a well-resolved eukaryotic tree of life. *Syst Biol* 59:518–533
- 901 Pattengale ND, Swenson KM, Moret BME (2010) Uncovering hidden phylogenetic consensus. In: *Lecture Notes in*  
902 *Computer Science (including subseries Lecture Notes in Artificial Intelligence and Lecture Notes in*  
903 *Bioinformatics)*.p 128–139
- 904 Pawlowski J (2008) The twilight of Sarcodina: a molecular perspective on the polyphyletic origin of amoeboid protists.  
905 *Protistology* 5:281–302
- 906 Pawlowski J, Burki F (2009) Untangling the phylogeny of amoeboid protists. *J Eukaryot Microbiol* 56:16–25
- 907 Philippe H, Zhou Y, Brinkmann H, Rodrigue N, Delsuc F (2005) Heterotachy and long-branch attraction in  
908 phylogenetics. *BMC Evol Biol* 5:50
- 909 Picelli S, Faridani OR, Björklund AK, Winberg G, Sagasser S, Sandberg R (2014) Full-length RNA-seq from single cells  
910 using Smart-seq2. *Nat Protoc* 9:171–181
- 911 Pollard TD (2007) Regulation of actin filament assembly by Arp2/3 complex and formins. *Annu Rev Biophys Biomol*  
912 *Struct* 36:451–477
- 913 Richards T a, Cavalier-Smith T (2005) Myosin domain evolution and the primary divergence of eukaryotes. *Nature*  
914 436:1113–8
- 915 Rojas AM, Fuentes G, Rausell A, Valencia A (2012) The Ras protein superfamily: Evolutionary tree and role of  
916 conserved amino acids. *J Cell Biol* 196:189–201

- 917 Rouiller I, Xu XP, Amann KJ, Egile C, Nickell S, Nicastro D, Li R, Pollard TD, Volkman N, Hanein D (2008) The structural  
918 basis of actin filament branching by the Arp2/3 complex. *J Cell Biol* 180:887–895
- 919 Roure B, Rodriguez-Ezpeleta N, Philippe H (2007) SCaFoS: a tool for selection, concatenation and fusion of sequences  
920 for phylogenomics. *BMC Evol Biol* 7 Suppl 1:S2
- 921 Salichos L, Stamatakis A, Rokas A (2014) Novel information theory-based measures for quantifying incongruence  
922 among phylogenetic trees. *Mol Biol Evol* 31:1261–1271
- 923 Schliwa M, Woehlke G (2003) Molecular motors. *Nature* 422:759–765
- 924 Seabra MC, Coudrier E (2004) Rab GTPases and myosin motors in organelle motility. *Traffic* 5:393–9
- 925 Sebé-Pedrós A, Grau-Bové X, Richards TA, Ruiz-Trillo I (2014) Evolution and classification of myosins, a paneukaryotic  
926 whole-genome approach. *Genome Biol Evol* 6:290–305
- 927 Sierra R, Cañas-Duarte SJ, Burki F, Schwelm A, Fogelqvist J, Dixelius C, González-García LN, Gile GH, Slamovits CH,  
928 Klopp C, Restrepo S, Arzul I, Pawlowski J (2015) Evolutionary origins of rhizarian parasites. *Mol Biol Evol*  
929 33:msv340–
- 930 Sierra R, Matz M V., Aglyamova G, Pillet L, Decelle J, Not F, Vargas C de, Pawlowski J (2013) Deep relationships of  
931 Rhizaria revealed by phylogenomics: A farewell to Haeckel’s Radiolaria. *Mol Phylogenet Evol* 67:53–59
- 932 Stamatakis A (2014) RAxML version 8: A tool for phylogenetic analysis and post-analysis of large phylogenies.  
933 *Bioinformatics* 30:1312–1313
- 934 Stamatakis A, Komornik Z, Berger SA (2010) Evolutionary placement of short sequence reads on multi-core  
935 architectures. In: 2010 ACS/IEEE International Conference on Computer Systems and Applications, AICCSA  
936 2010.p 1–44
- 937 Sugiyama K, Hori RS, Kusunoki Y, Matsuoka A (2008) Pseudopodial features and feeding behavior of living  
938 nassellarians *Eucyrtidium hexagonatum* Haeckel, *Pterocorys zancleus* (Müller) and *Dictyocodon prometheus*  
939 Haeckel. *Paleontol Res* 12:209–222
- 940 Suzuki NO, Aita YO (2011) Radiolaria: achievements and unresolved issues: taxonomy and cytology. *Plankt Benthos*  
941 *Res* 6:69–91
- 942 Townsend JP (2007) Profiling phylogenetic informativeness. *Syst Biol* 56:222–231
- 943 Townsend JP, Su Z, Tekle YI, Ownsend JEPT, Huo ZSU (2012) Phylogenetic signal and noise: predicting the power of a  
944 data set to resolve phylogeny. *Syst Biol* 61:835–49
- 945 Travis JL, Allen RD (1981) Studies on the Motility of the Foraminifera .1. Ultrastructure of the Reticulopodial Network  
946 of *Allogromia-Laticollaris* (Arnold). *J Cell Biol* 90:211–221
- 947 Travis JL, Bowser SS (1986) A new model of reticulopodial motility and shape: evidence for a microtubule-based motor  
948 and an actin skeleton. *Cell Motil Cytoskeleton* 6:2–14
- 949 Ura S, Pollitt AY, Veltman DM, Morrice N a., MacHesky LM, Insall RH (2012) Pseudopod growth and evolution during  
950 cell movement is controlled through SCAR/WAVE dephosphorylation. *Curr Biol* 22:553–561
- 951 Vale RD (2003) The molecular motor toolbox for intracellular transport. *Cell* 112:467–480



- 952 Volkmann N, Amann KJ, Stoilova-McPhie S, Egile C, Winter DC, Hazelwood L, Heuser JE, Li R, Pollard TD, Hanein D  
953 (2001) Structure of Arp2/3 complex in its activated state and in actin filament branch junctions. *Science*  
954 293:2456–2459
- 955 Welnhof E a, Travis JL (1998) Evidence for a direct conversion between two tubulin polymers--microtubules and  
956 helical filaments--in the foraminiferan, *Allogromia laticollaris*. *Cell Motil Cytoskeleton* 41:107–116
- 957 Wickstead B, Gull K (2011) The evolution of the cytoskeleton. *J Cell Biol* 194:513–525
- 958 Xu X-P, Rouiller I, Slaughter BD, Egile C, Kim E, Unruh JR, Fan X, Pollard TD, Li R, Hanein D, Volkmann N (2011) Three-  
959 dimensional reconstructions of Arp2/3 complex with bound nucleation promoting factors. *EMBO J* 31:236–247
- 960 Zhang J, Kobert K, Flouri T, Stamatakis A (2013) PEAR: A fast and accurate Illumina Paired-End reAd mergeR.  
961 *Bioinformatics* 30:1–7
- 962
- 963

964 **Table 1:** Single cell transcriptome statistics

| Species name                | Raw Reads  | Contigs <sup>1</sup> | GC-content (%) | Predicted Genes <sup>2</sup> |
|-----------------------------|------------|----------------------|----------------|------------------------------|
| <i>Sticholonche zanclea</i> | 19,894,654 | 19,509               | 53.5           | 4,749                        |
| <i>Lithomelissa setosa</i>  | 11,590,658 | 12,212               | 48.8           | 2,122                        |

965 <sup>1</sup>Number of contigs assembled by Trinity (Haas et al. 2013). <sup>2</sup>The number of genes predicted by TransDecoder in the  
 966 Trinity platform.

967

968 **Table 2:** Rhizarian transcriptomes from MMETSP (Keeling et al. 2014) used in this study.

| Sample Id  | Phylum             | Species                             | Strain    | Transcripts <sup>1</sup> |
|------------|--------------------|-------------------------------------|-----------|--------------------------|
| MMETSP0040 | Chlorarachniophyta | <i>Lotharella oceanica</i>          | CCMP622   | 17,354                   |
| MMETSP0041 | Chlorarachniophyta | <i>Lotharella globosa</i>           | LEX01     | 25,644                   |
| MMETSP0042 | Chlorarachniophyta | <i>Amorphochlora amoebiformis</i> * | CCMP2058  | 23,387                   |
| MMETSP0045 | Chlorarachniophyta | <i>Bigelowiella natans</i>          | CCMP 2755 | 22,651                   |
| MMETSP0109 | Chlorarachniophyta | <i>Chlorarachnion reptans</i>       | CCCM449   | 26,481                   |
| MMETSP0110 | Chlorarachniophyta | <i>Gymnochlora</i> sp.              | CCMP2014  | 15,507                   |
| MMETSP0111 | Chlorarachniophyta | <i>Lotharella globosa</i>           | CCCM811   | 19,670                   |
| MMETSP0112 | Chlorarachniophyta | <i>Lotharella globosa</i>           | CCCM811   | 11,910                   |
| MMETSP0113 | Chlorarachniophyta | <i>Norrisiella sphaerica</i>        | BC52      | 14,550                   |
| MMETSP0186 | Cercozoa           | <i>Minchinia chitonis</i>           | Missing   | 461                      |
| MMETSP1052 | Chlorarachniophyta | <i>Bigelowiella natans</i>          | CCMP623   | 24,186                   |
| MMETSP1318 | Chlorarachniophyta | <i>Partenskyella glossopodia</i>    | RCC365    | 15,025                   |
| MMETSP1358 | Chlorarachniophyta | <i>Bigelowiella natans</i>          | CCMP1242  | 18,273                   |
| MMETSP1359 | Chlorarachniophyta | <i>Bigelowiella longifila</i>       | CCMP242   | 15,959                   |
| MMETSP1384 | Foraminifera       | <i>Ammonia</i> sp.                  | Missing   | 31,225                   |
| MMETSP1385 | Foraminifera       | <i>Elphidium margaritaceum</i>      | Missing   | 25,184                   |

969 <sup>1</sup>The number of amino acid sequences for the sample. \**Amorphochlora amoebiformis* is called *Lotharella*  
 970 *amoebiformis* in MMETSP, but it was moved to the genus *Amorphochlora* by Ishida et al., (2011)

971

972 **Figure Legends**

973 **Figure 1:** The two specimens sequenced. A) *Lithomelissa setosa*, B) *Sticholonche zanclea*. Scale bar  
974 50  $\mu\text{m}$ .

975 **Figure 1 – figure supplement 1:** Gene accumulation curve. The number of predicted genes is  
976 plotted against subsamples of the original dataset. Each subsample is independently assembled  
977 before gene prediction.

978

979 **Figure 2:** Bayesian phylogeny with the CATGTR model, 255 genes, 54,898 AA, and 91 taxa, maxdiff  
980 0.2666. Species sequenced for this paper in bold. Thick branches represent maximal support  
981 (posterior probability = 1). Number after '@' is concatenated sequence length. Important clades in  
982 Rhizaria are coloured for easier identification: brown = Foraminifera, dark red = Taxopodida, red =  
983 Radiolaria, yellow = Endomyxa, blue= Chlorarachniophyta (Filosa), and green = Mondaofilosa  
984 (Filosa). The scale bar equals the mean number of substitutions per site. The changing support  
985 values for selected branches depending on the number of genes, and the number of fast evolving  
986 sites removed are shown in Figure 2 – figure supplement 1.

987 **Figure 2 – figure supplement 1:** Influence of number of genes, and fast evolving sites on the  
988 Bayesian analysis using the CATGTR model, with the exception of the dataset 146 (LG) where the  
989 LG model was used. See text for discussion. **Number of genes** is the number of genes used in the  
990 concatenated data set. **Number of bins removed** equals the number of bins of fast evolving sites  
991 removed by TIGER (Cummins & McInerney 2011). The numbers in the matrix represent posterior  
992 probability for the branch marked with an asterisk. (A) The internal relationship in SAR, the first  
993 tree represents the monophyly of Stramenopiles and Alveolates, with Rhizaria as sister. The  
994 second tree represents the monophyly of Alveolates and Rhizaria, with Stramenopiles as sister. (B)  
995 The placement of Taxopodida: The first tree is the support value for Taxopodida as sister to  
996 Radiolarians, with Foraminifera as outgroup. In the second tree Taxopodida is basal in Retaria with  
997 the values showing support for the monophyly of Radiolaria and Foraminifera, excluding  
998 Taxopodida.

999

1000 **Figure 3:** Maximum likelihood with the LG model, 255 genes, 54,898 AA, and 91 taxa. Species  
1001 sequenced for this paper in bold. Thick branches represent maximal support (bootstrap = 100 %).  
1002 Number after '@' is concatenated sequence length. As in figure 2 important clades in Rhizaria are

1003 coloured for easier identification: brown = Foraminifera, dark red = Taxopodida, red=Radiolaria,  
1004 yellow = Endomyxa, blue= Chlorarachniophyta (Filosa), and green = Mondaofilosa (Filosa). The  
1005 scale bar equals the mean number of substitutions per site. The changing support values for  
1006 selected branches depending on the number of genes, and the number of fast evolving sites  
1007 removed are shown in Figure 3 – figure supplement 1.

1008 **Figure 3 – figure supplement 1:** Influence of number of genes, and fast evolving sites on the ML  
1009 analysis. **Number of genes** is the number of genes used in the concatenated data set. **Number of**  
1010 **bins removed** equals the number of bins of fast evolving sites removed by TIGER (Cummins &  
1011 McInerney 2011). The numbers in the matrix represent ML bootstrap values for the branch  
1012 marked with an asterisk. (A) The internal relationship in SAR, the first tree represents the  
1013 monophyly of Stramenopiles and Alveolates, with Rhizaria as sister. The second tree represents  
1014 the monophyly of Alveolates and Rhizaria, with Stramenopiles as sister. (B) The placement of  
1015 Taxopodida: The first tree is the support value for Taxopodida as sister to Radiolarians, with  
1016 Foraminifera as outgroup. In the second tree Taxopodida is basal in Retaria with the values  
1017 showing support for the monophyly of Radiolaria and Foraminifera, excluding Taxopodida.

1018

1019 **Figure 4:** Actin phylogeny (229 taxa, 374 AA). Thick branches represents bootstrap > 75% and  
1020 posterior probability > 0.9. Some branches are collapsed to save space. Support values for selected  
1021 nodes discussed in the text added for clarity. The scale bar equals the mean number of  
1022 substitutions per site. The colouring scheme is the same as in figure 2. (Brown = Foraminifera, red=  
1023 Radiolaria/Taxopodida, yellow = Endomyxa and blue= Filosa)

1024

1025 **Figure 5:** Phylogenies of the seven genes in the Arp2/3 complex. *Arp2* (39 taxa, 373 AA), *Arp3* (33  
1026 taxa, 403 AA), *ARPC1* (34 taxa, 328 AA), *ARPC2* (24 taxa, 303 AA), *ARPC3* (30 taxa, 181 AA), *ARPC4*  
1027 (23 taxa, 169 AA) and *ARPC5* (29 taxa, 151 AA). Colouring of groups as in figure 2 (Brown =  
1028 Foraminifera, red= Radiolaria, yellow = Endomyxa and blue= Filosa). Thick branches represents  
1029 bootstrap > 75% and posterior probability > 0.9 and the scale bar equals the mean number of  
1030 substitutions per site. (A) The two genes with a recent duplication in Chlorarachniophyta (*Arp2*  
1031 and *ARPC1*). (B) The five genes without duplication in Chlorarachniophyta (*ARP3*, *ARPC2*, *ARPC3*,  
1032 *ARPC4*, *ARPC5*).

1033

1034 **Figure 6:** Molecular models of the Arp2a and Arp2b paralogs in Chlorarachniophyta with  
1035 evolutionary rates from Consurf superimposed on the Arp2/3 complex (PDB accession 4JD2; Arp2  
1036 red, Arp3 orange, ARPC1 green, ARPC2 cyan, ARPC3 pink, ARPC4 blue, ARPC5 yellow). Residues are  
1037 coloured according to the evolutionary rates calculated by Consurf. Turquoise residues are highly  
1038 variable and maroon means conserved residues.

1039

1040 **Figure 7:** Molecular models of the ARPC1a and ARPC1b paralogs in Chlorarachniophyta with  
1041 evolutionary rates from Consurf superimposed on the Arp2/3 complex (PDB accession 4JD2; Arp2  
1042 red, Arp3 orange, ARPC1 green, ARPC2 cyan, ARPC3 pink, ARPC4 blue, ARPC5 yellow). Residues are  
1043 coloured according to the evolutionary rates calculated by Consurf. Turquoise residues are highly  
1044 variable and maroon means conserved residues.

1045

1046 Figure 8: Comparison of conserved residues between the two paralogs of Arp2 and the two  
1047 paralogs of ARPC1 in Chlorarachniophytes superimposed on PDB accession 4JD2. A) Conserved  
1048 residues from the two different paralogs of Arp2 (Arp2a and Arp2b). Red represent residues  
1049 conserved in Arp2a only, blue are conserved in Arp2b only, while green residues are conserved in  
1050 both paralogs. B) Conserved site from the two different paralogs of ARPC1 (ARPC1 and ARPC1b).  
1051 Red sites represent residues conserved in ARPC1 only, blue are conserved in ARPC1 only, while  
1052 green residues are conserved in both paralogs.

1053

1054 **Figure 9:** Myosin maximum likelihood phylogeny, (830 taxa, 754 AA). Groups coloured according  
1055 to taxonomic affinity as in figure 2 (blue= Chlorarachniophyta, brown= Foraminifera). Branches  
1056 collapsed according to myosin class affiliation and following the nomenclature of Sebé-Pedrós et  
1057 al., (2014). The tree is midpoint-rooted and thick branches represents bootstrap > 75%, and  
1058 Bayesian support > 0.8 pp. The scale bar equals the mean number of substitutions per site. The  
1059 domain architectures for each class with representatives from Rhizaria are shown. IPR annotation  
1060 of functional domains is listed Figure 9 – figure supplement 1. A complete ML tree without  
1061 collapsed branches can be found in Figure 9 – figure supplement 2.

1062 **Figure 9 – figure supplement 1:** InterPro domains of myosins annotated with InterProscan (Jones  
1063 et al. 2014, Mitchell et al. 2015).

1064 **Figure 9 – figure supplement 2:** Maximum likelihood tree of myosin showing all branches. Names  
1065 of taxa and myosin classes are from of Sebé-Pedrós et al. (2014), except newly discovered  
1066 sequences from MMETSP and new myosin classes. The scale bar equals the mean number of  
1067 substitutions per site

1068

1069 **Figure 10:** Phylogeny of rhizarian  $\alpha$ -tubulin (75 taxa, 453 AA). Thick branches represents bootstrap  
1070 > 75% and posterior probability > 0.9. Some branches are collapsed to save space. Support values  
1071 for selected nodes discussed in the text are added for clarity. The colouring scheme is the same as  
1072 in figure 2. (Brown = Foraminifera, red= Radiolaria, yellow = Endomyxa, and blue= Filosa). The  
1073 scale bar equals the mean number of substitutions per site.

1074

1075 **Figure 11:** Phylogeny of rhizarian  $\beta$ -tubulin (104 taxa, 456 AA). Thick branches represents  
1076 bootstrap > 75% and posterior probability > 0.9. Some branches are collapsed to save space.  
1077 Support values for selected nodes discussed in the text are added for clarity. The colouring scheme  
1078 is the same as in figure 2. (Brown = Foraminifera, red= Radiolaria, yellow = Endomyxa, and blue=  
1079 Filosa). The scale bar equals the mean number of substitutions per site.

1080

1081 **Figure 12** Molecular models of paralogs of  $\alpha$ -tubulin ( $\alpha$ 1- and  $\alpha$ 2-tub) in Retaria using PDB  
1082 accession 3du7 as template. Residues are coloured according to the evolutionary rates calculated  
1083 by ConSurf. Turquoise residues are highly variable and maroon means conserved residues.

1084 **Figure 13:** Molecular models of paralogs of  $\beta$ -tubulin ( $\beta$ 1- and  $\beta$ 2-tub) in Retaria using PDB  
1085 accession 3du7 as template. Residues are coloured according to the evolutionary rates calculated  
1086 by ConSurf. Turquoise residues are highly variable and maroon means conserved residues.

1087

1088 **Figure 14.** Phylogenetic tree of Rhizaria based on the full dataset, 255 genes, summarizing the  
1089 major evolutionary events. Taxa with large portions of missing data are placed on the maximum  
1090 likelihood reference tree with the Evolutionary Placement Algorithm (EPA; Berger et al., 2011).  
1091 Taxa in bold are sequenced for this study. Arrows mark important evolutionary events,  
1092 morphological changes and gene duplications. Thick branches are highly supported with  
1093 bootstrap support >90% and posterior probability > 0.9. Branches in grey are the most likely  
1094 placement of taxa from EPA with numbers showing the expected likelihood weights for the

1095 placement. Branches that differ between maximum likelihood and Bayesian trees are marked  
1096 with dashed lines. For *Sticholonche zancelea* the blue line represent the Bayesian CATGR placement  
1097 with posterior probability, red dashed line represents the maximum likelihood LG placement with  
1098 bootstrap support. For a further discussion of the placement of *Sticholonche zancelea* and the  
1099 relationship between Alveolates, Stramenopiles and Rhizaria see the text. The scale bar equals the  
1100 mean number of substitutions per site.

1101

Figure 1

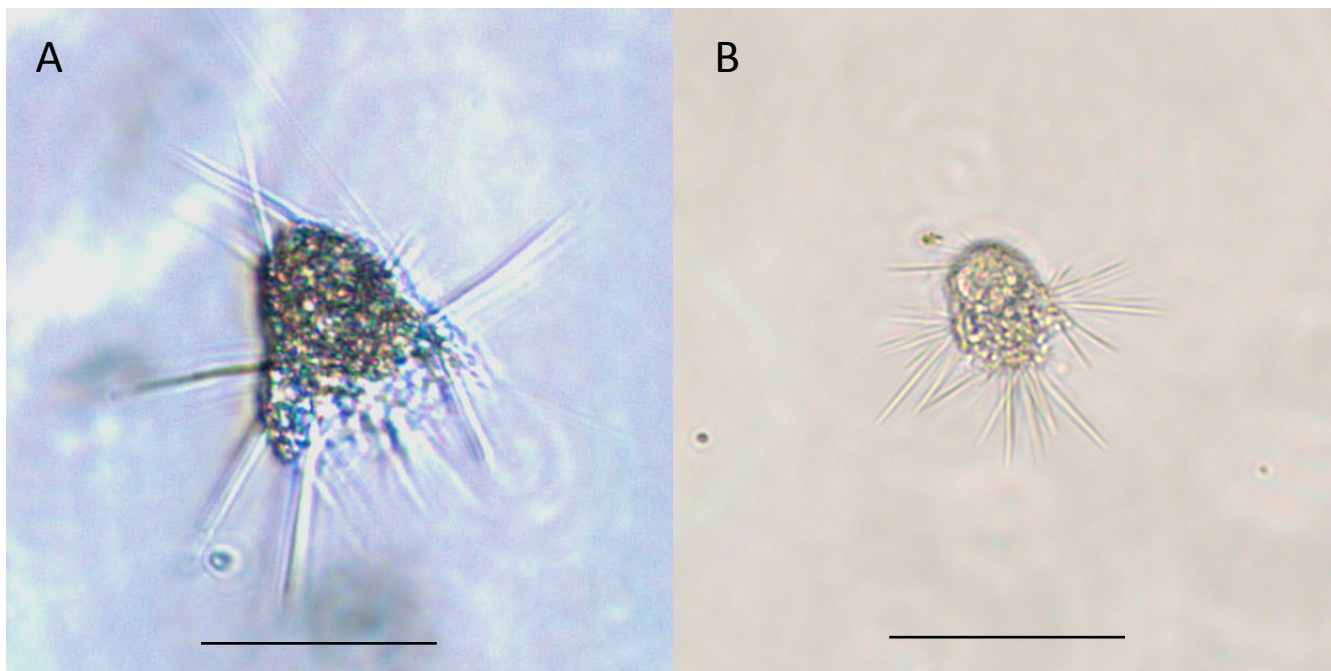



Figure 1 - figure supplement 1

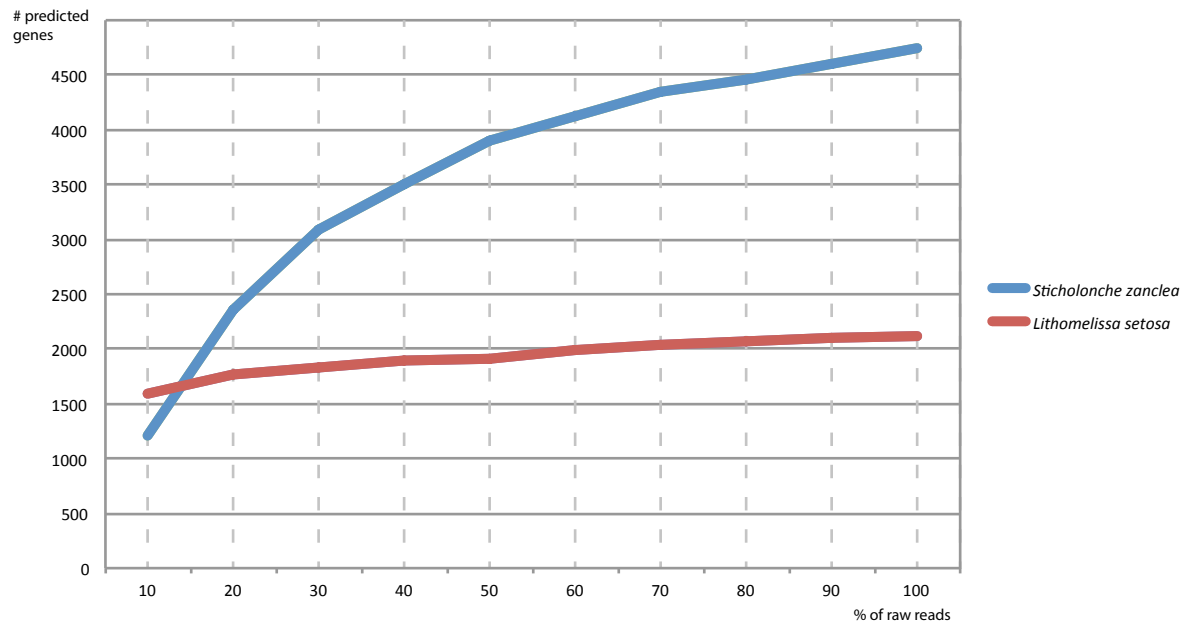

Figure 2

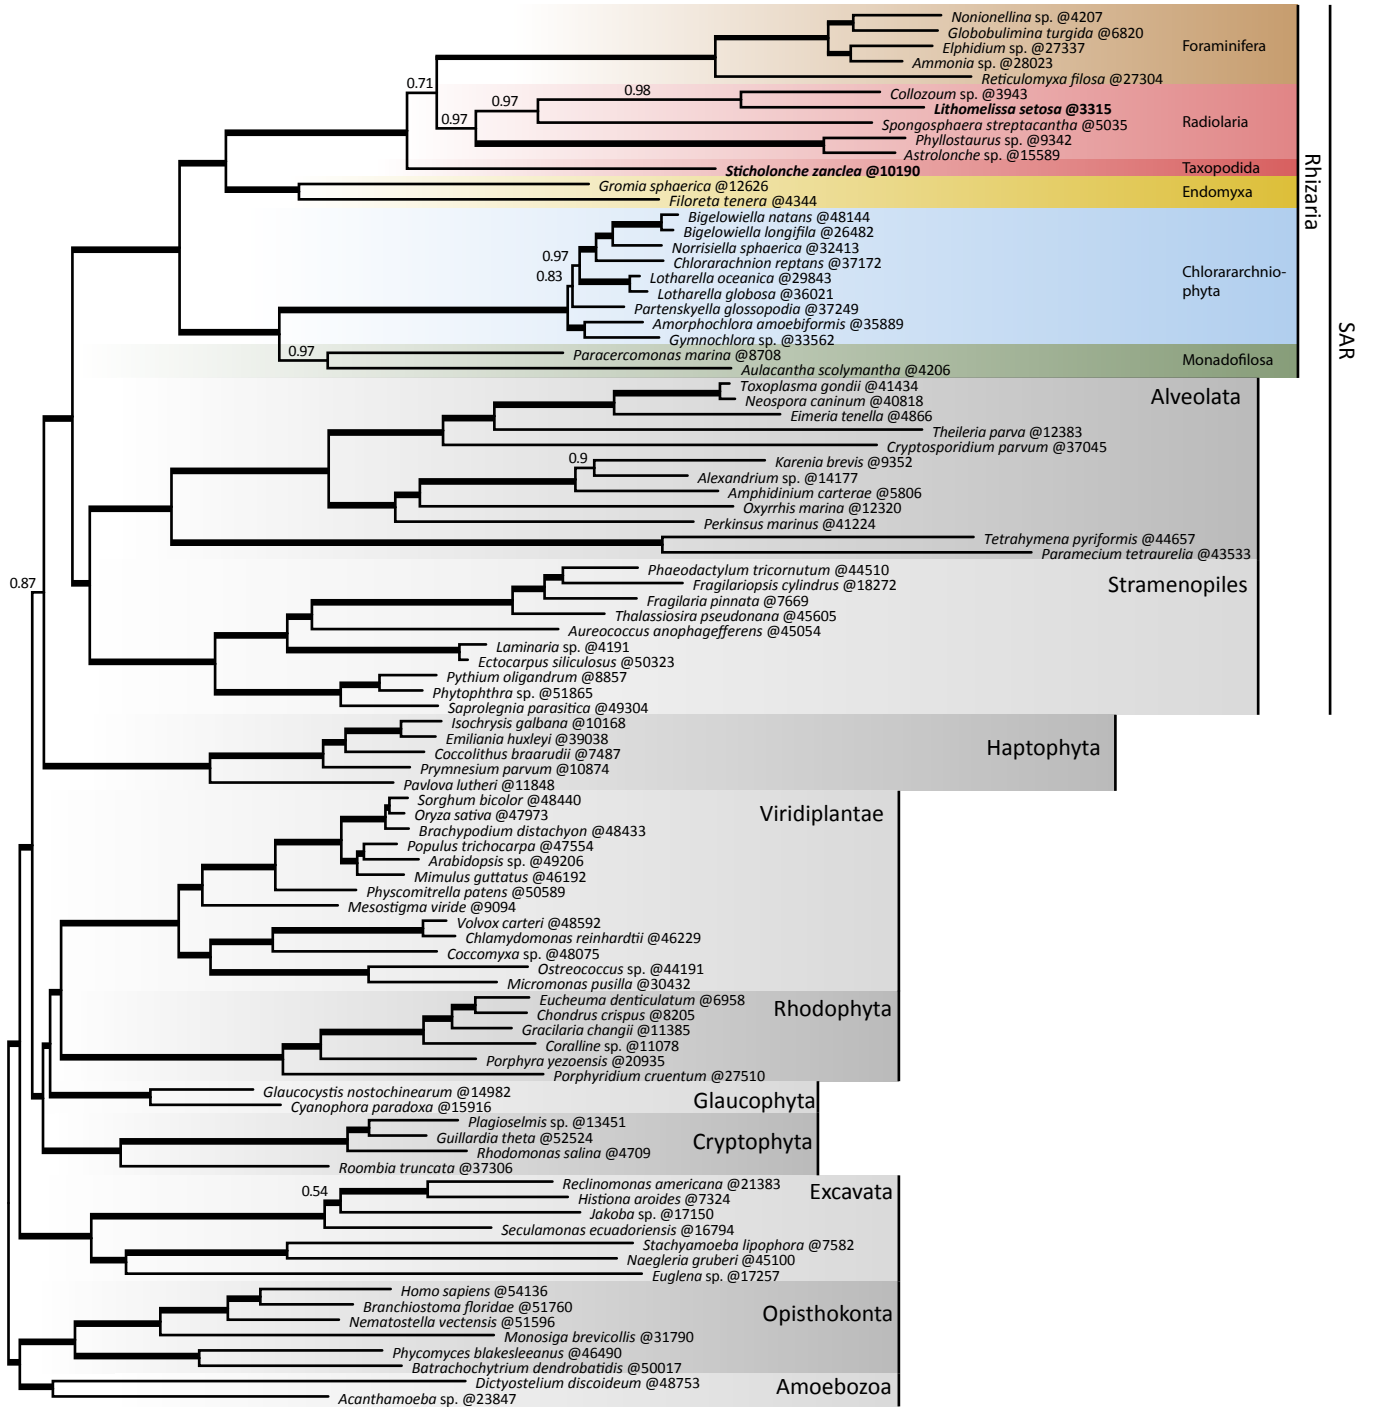

0.2

Figure 2 - figure supplement 1

| Bayesian        |                        | A) SAR - relationship                                                             |                                                                                   | B) Placement of Taxopodida                                                         |                                                                                     |
|-----------------|------------------------|-----------------------------------------------------------------------------------|-----------------------------------------------------------------------------------|------------------------------------------------------------------------------------|-------------------------------------------------------------------------------------|
| Number of genes | Number of bins removed |  |  |  |  |
| 255             | 0                      | 1                                                                                 | -                                                                                 | -                                                                                  | 0.71                                                                                |
|                 | 4                      | 1                                                                                 | -                                                                                 | -                                                                                  | 0.97                                                                                |
| 146             | 0                      | 1                                                                                 | -                                                                                 | -                                                                                  | 0.81                                                                                |
| 146 (LG)        | 0                      | 1                                                                                 | -                                                                                 | 0.67                                                                               | -                                                                                   |

Figure 3  
Maximum likelihood

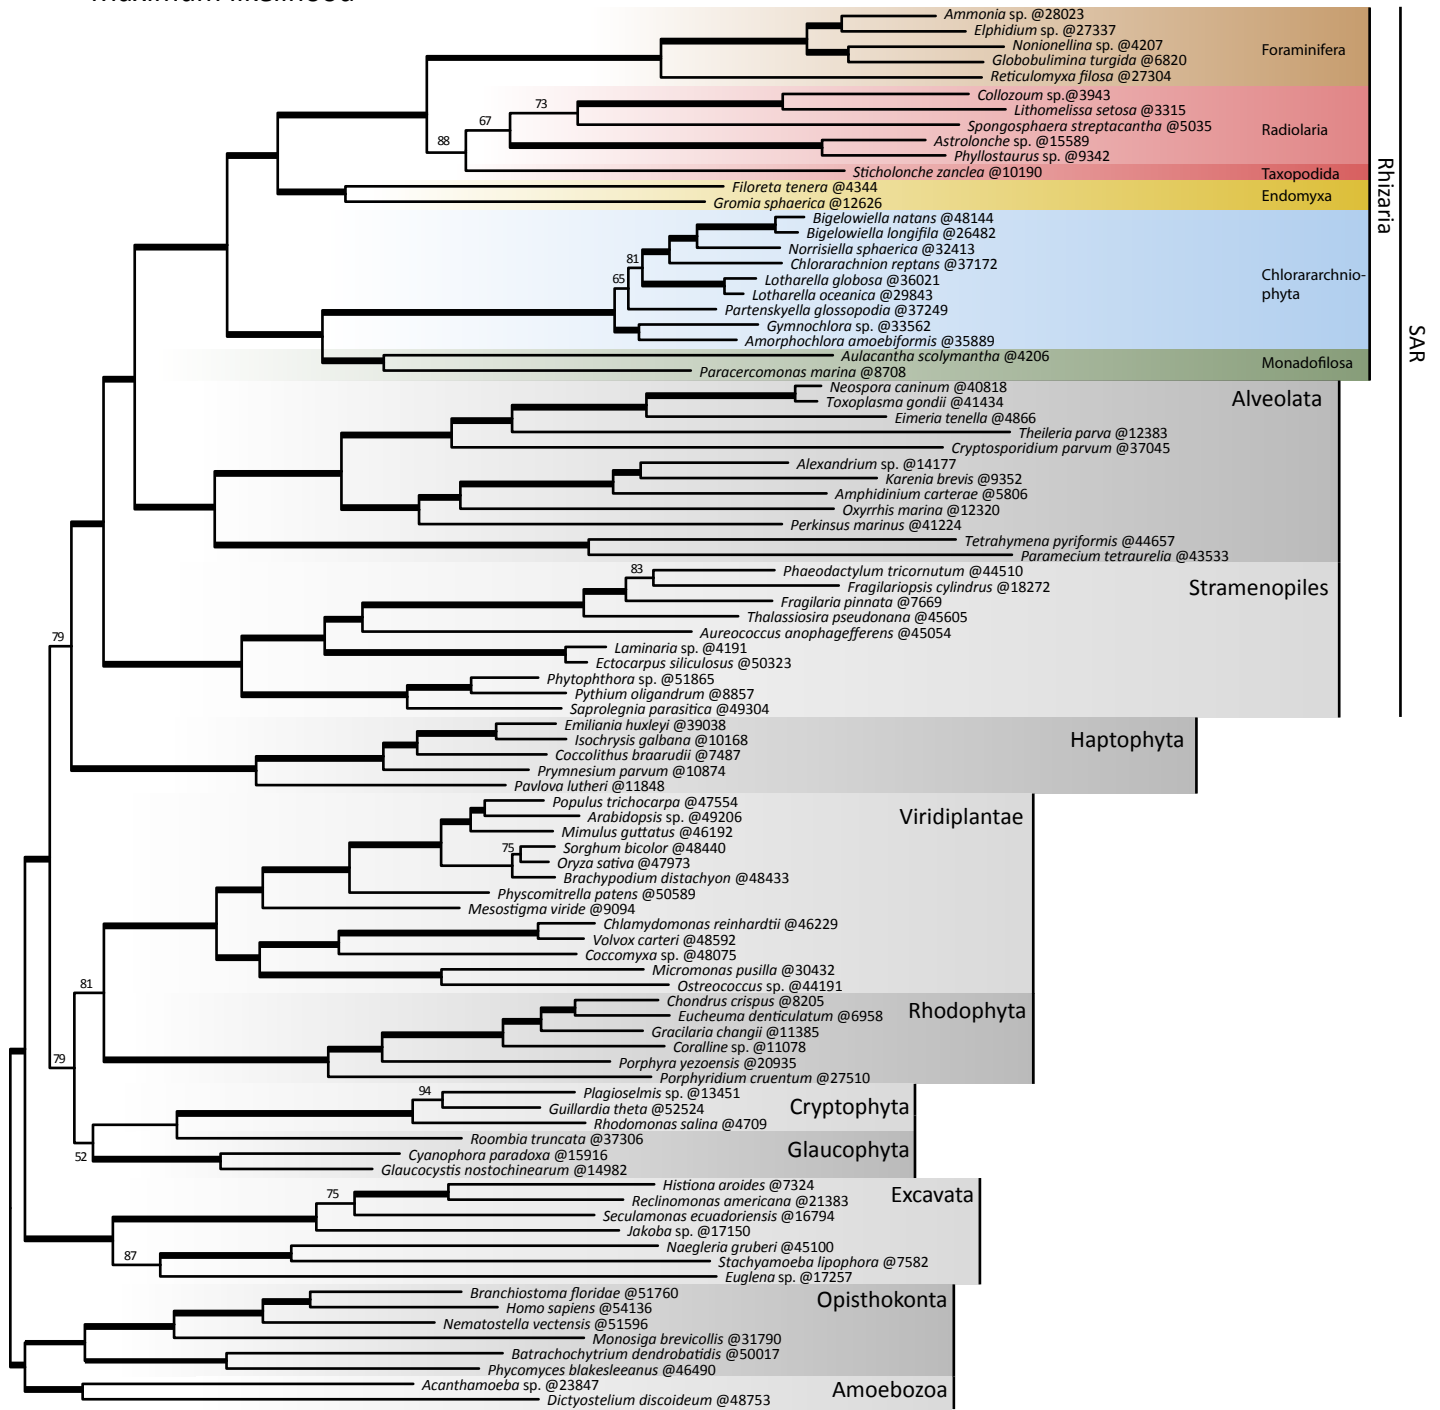

Figure 3 - figure supplement 1

| Maximum Likelihood |                        | A) SAR - relationship                                                             |                                                                                   | B) Placement of Taxopodida                                                         |                                                                                     |
|--------------------|------------------------|-----------------------------------------------------------------------------------|-----------------------------------------------------------------------------------|------------------------------------------------------------------------------------|-------------------------------------------------------------------------------------|
| Number of genes    | Number of bins removed | 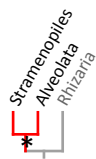 |  |  |  |
|                    |                        | 255                                                                               | 0                                                                                 | -                                                                                  | 96                                                                                  |
| 4                  | -                      |                                                                                   | 67                                                                                | -                                                                                  | 50                                                                                  |
| 146                | 0                      | -                                                                                 | 85                                                                                | 87                                                                                 | -                                                                                   |
|                    | 4                      | 74                                                                                | -                                                                                 | -                                                                                  | 75                                                                                  |

Figure 4

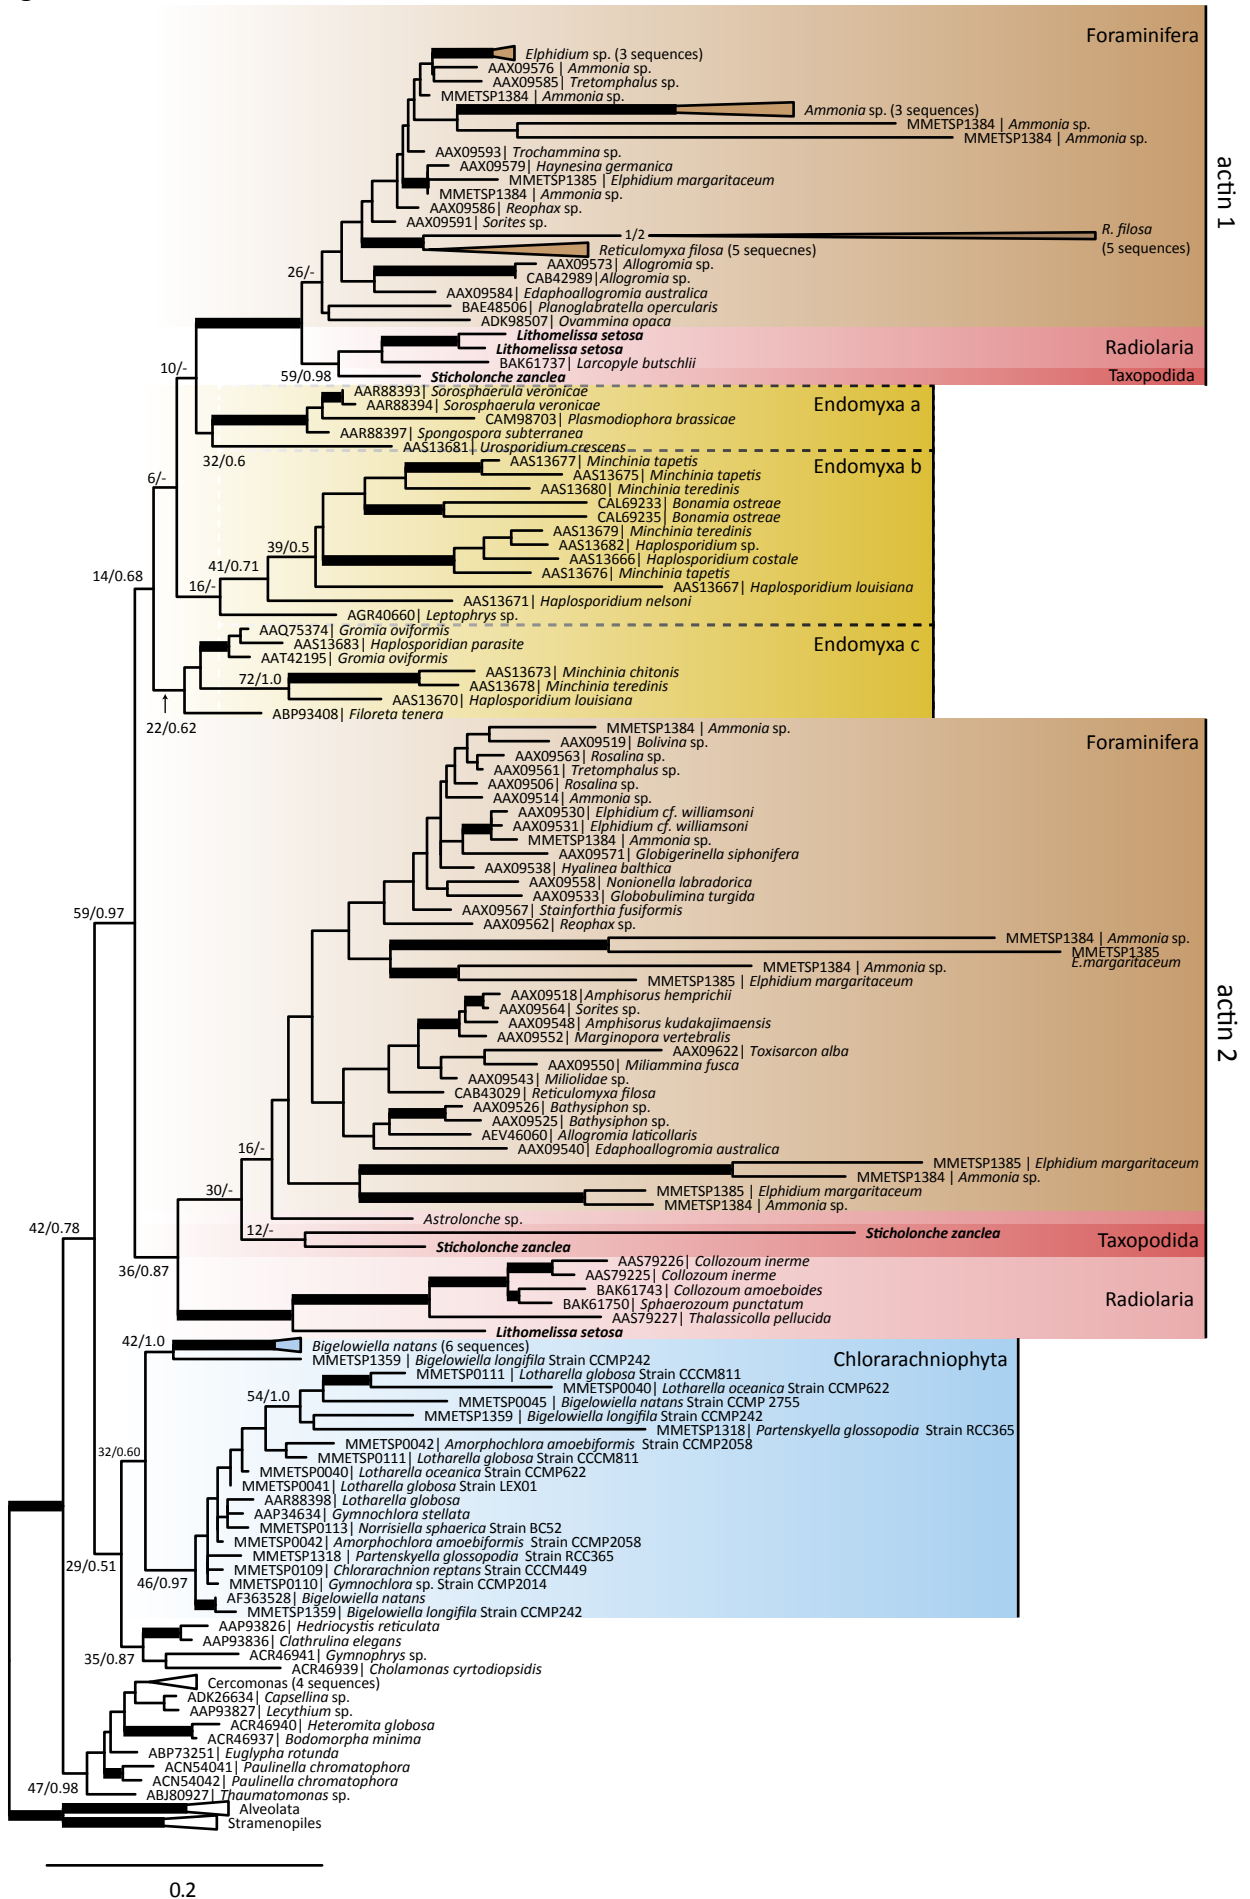

Figure 5

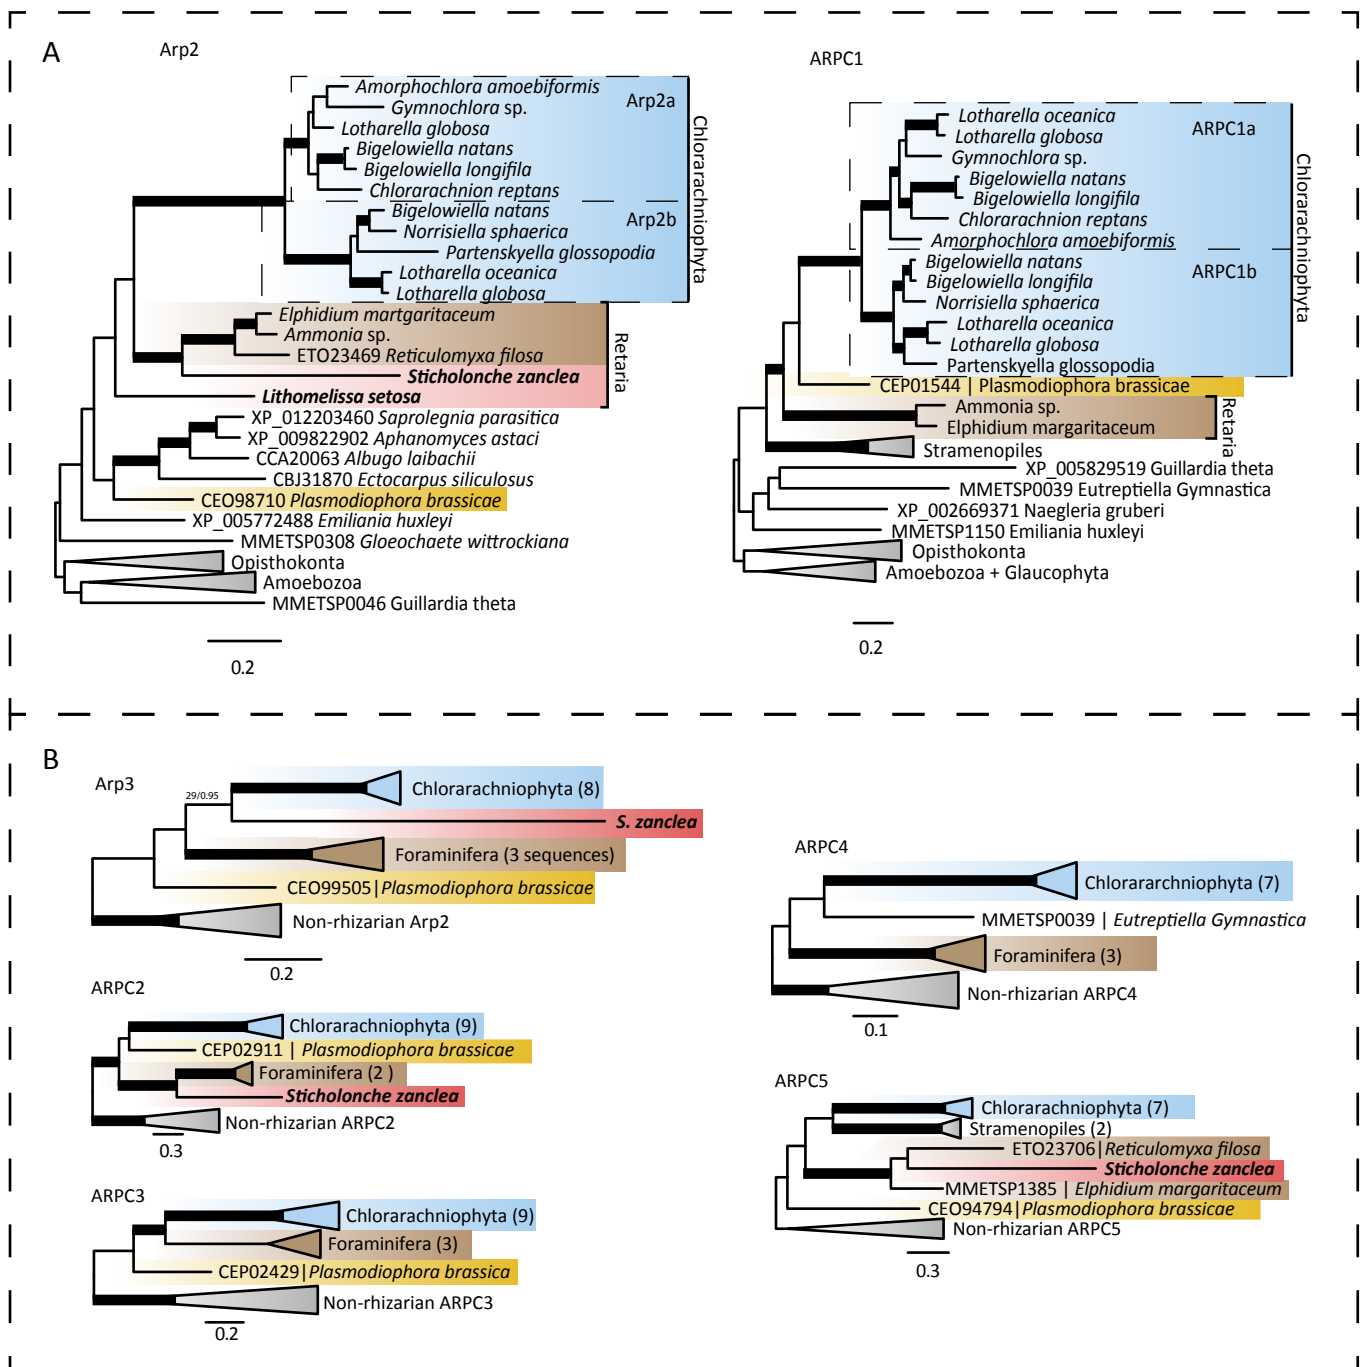

Figure 6

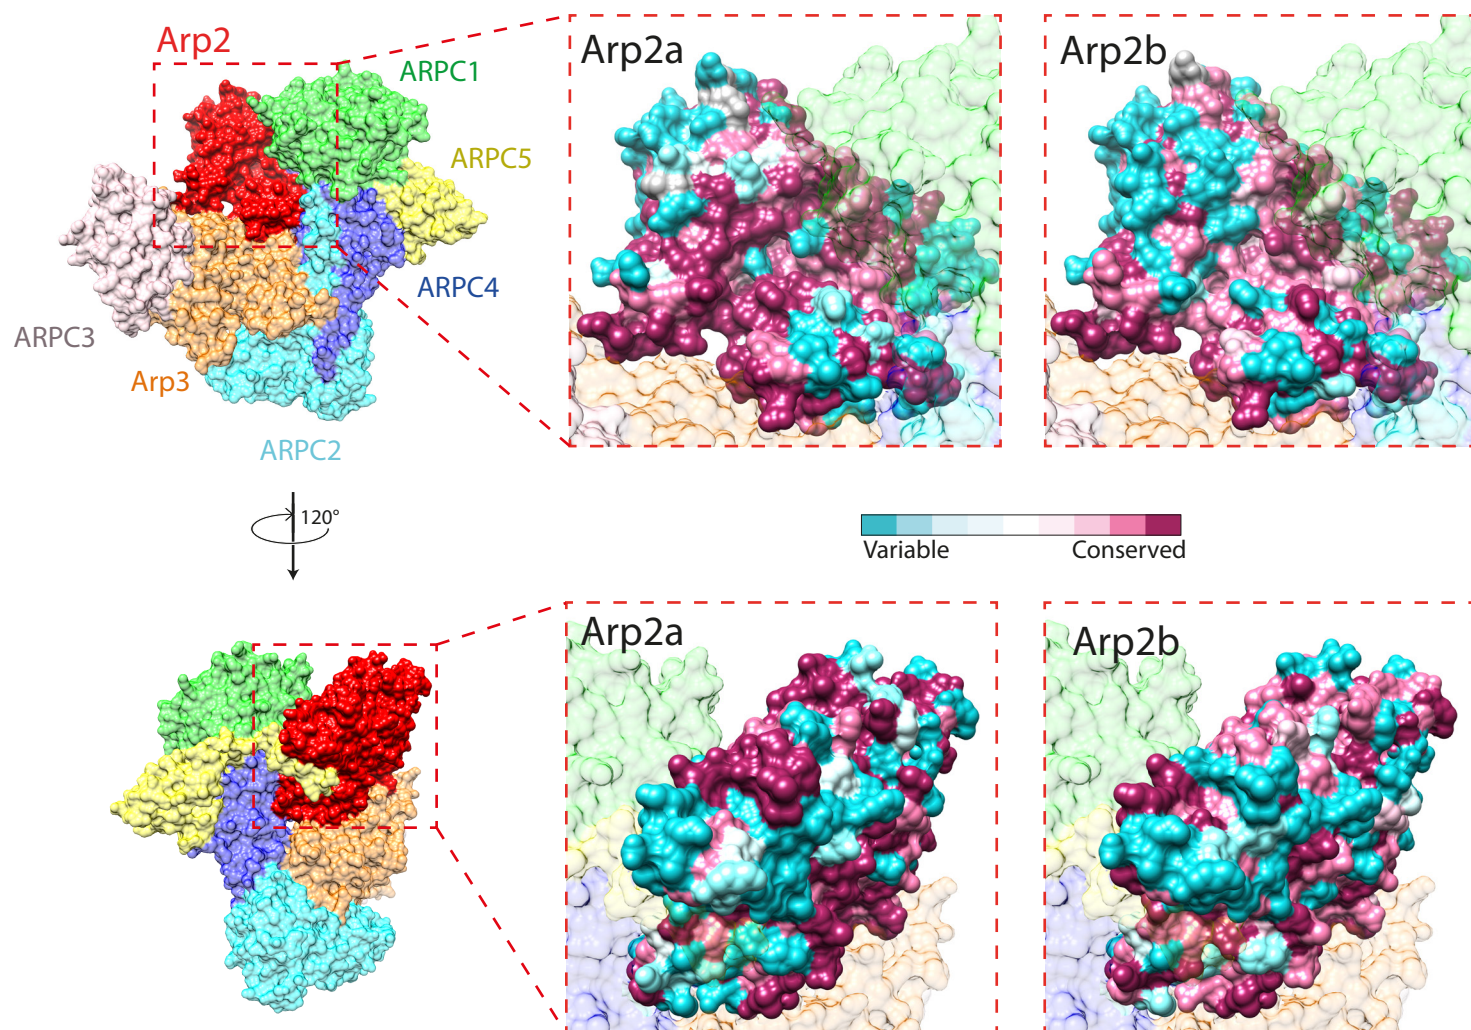



Figure 7

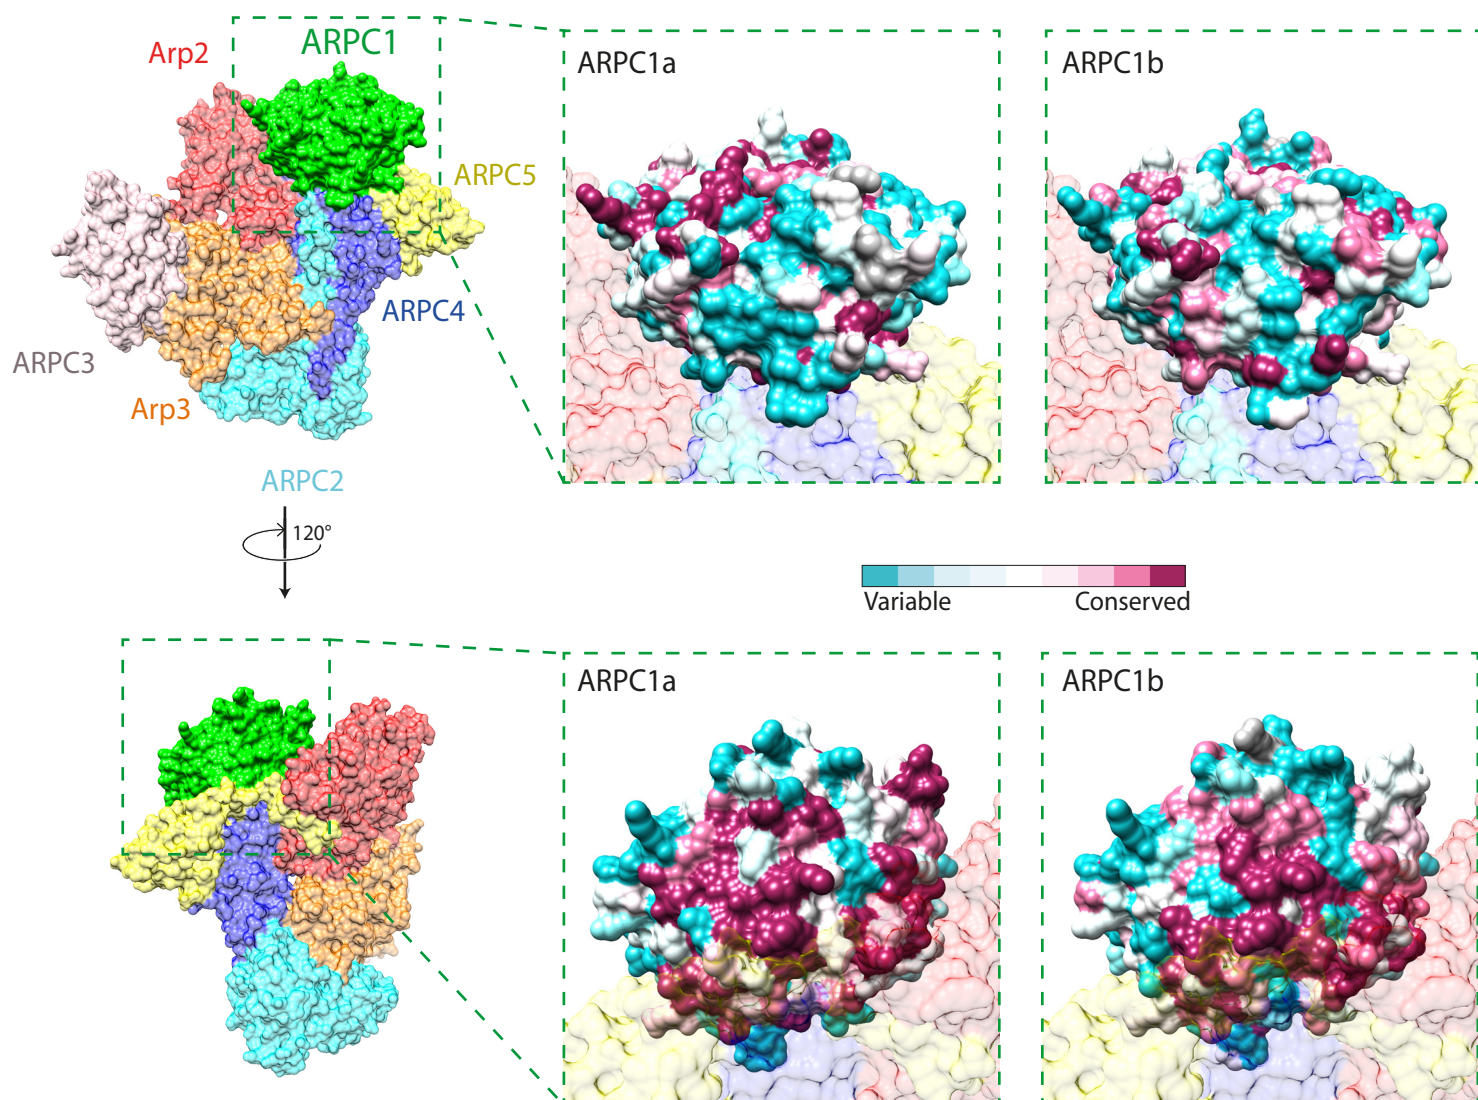

Figure 8

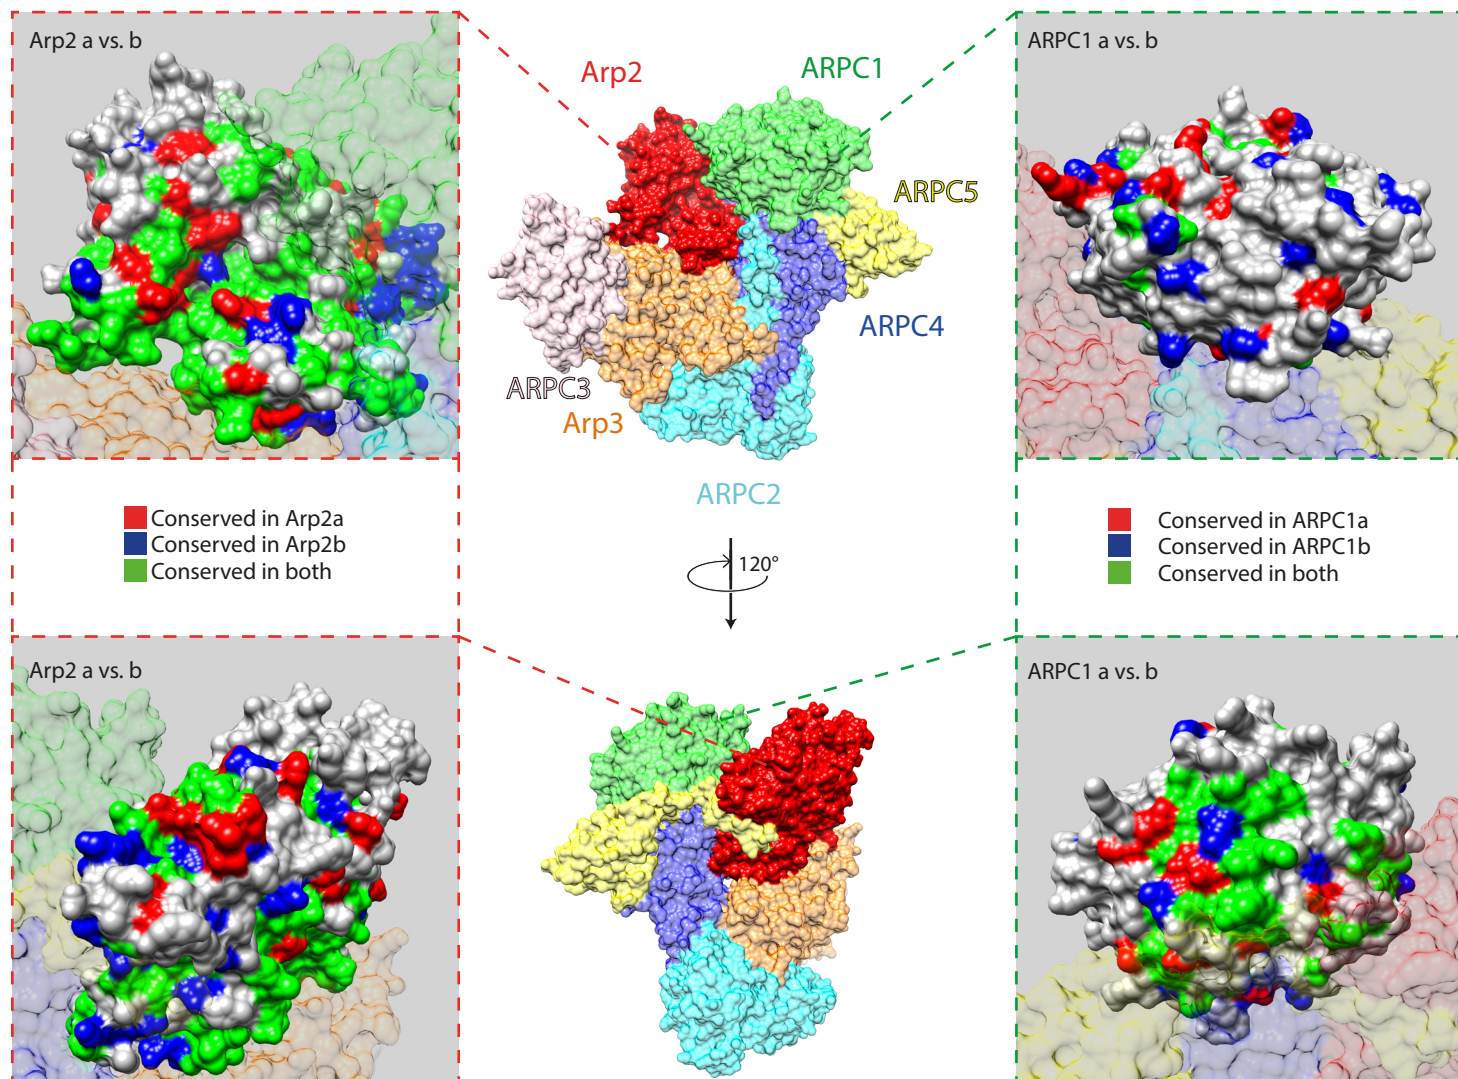



Figure 9 - Figure supplement 1

| Functional InterPro domains |           |
|-----------------------------|-----------|
| Myosin head                 | IPR001609 |
| WW                          | IPR001202 |
| IQ                          | IPR000048 |
| Myosin TH1                  | IPR010926 |
| EF                          | IPR002048 |
| SH3                         | IPR001452 |
| CH                          | IPR001715 |
| LRR_RI                      | IPR032675 |
| MyTH4                       | IPR000857 |
| DUF                         | IPR025640 |
| MN                          | IPR004009 |
| DH                          | IPR000219 |
| PH                          | IPR011993 |
| FYVE                        | IPR013083 |
| MORN                        | IPR003409 |
| RCC1                        | IPR000408 |



Figure 10

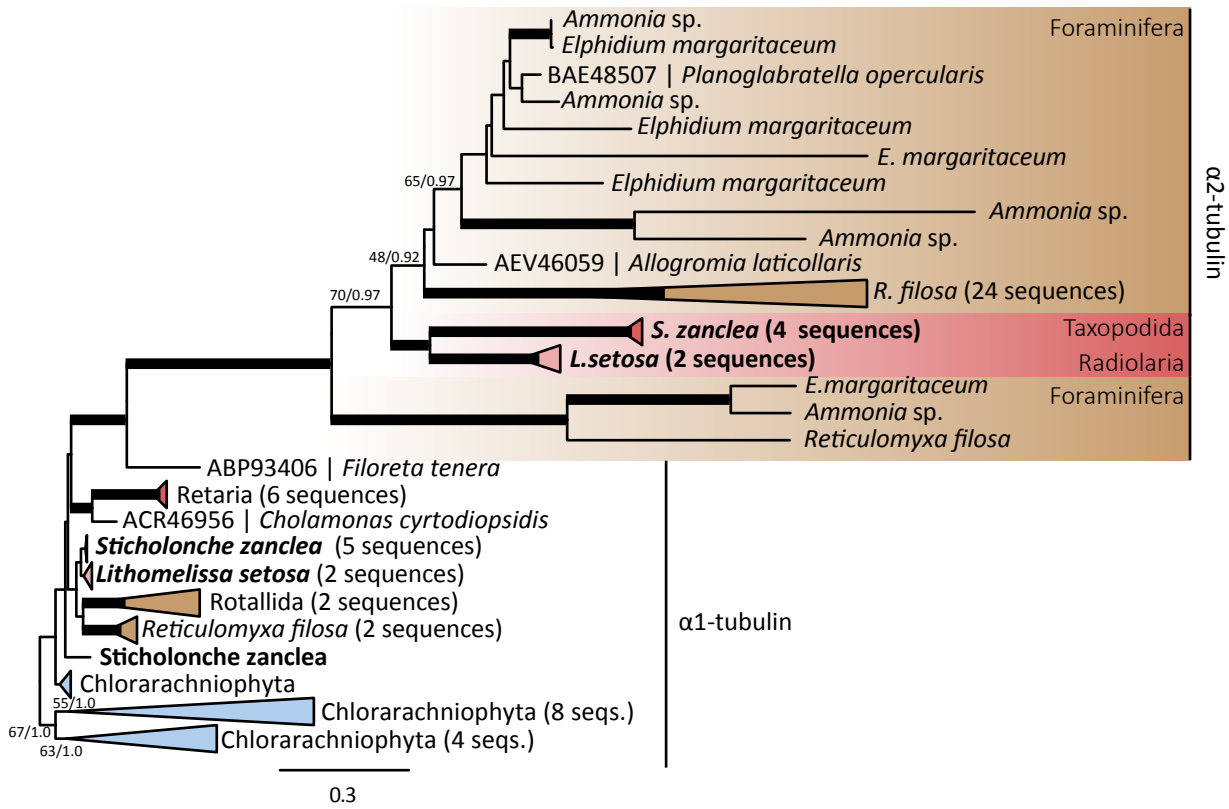

Figure 11

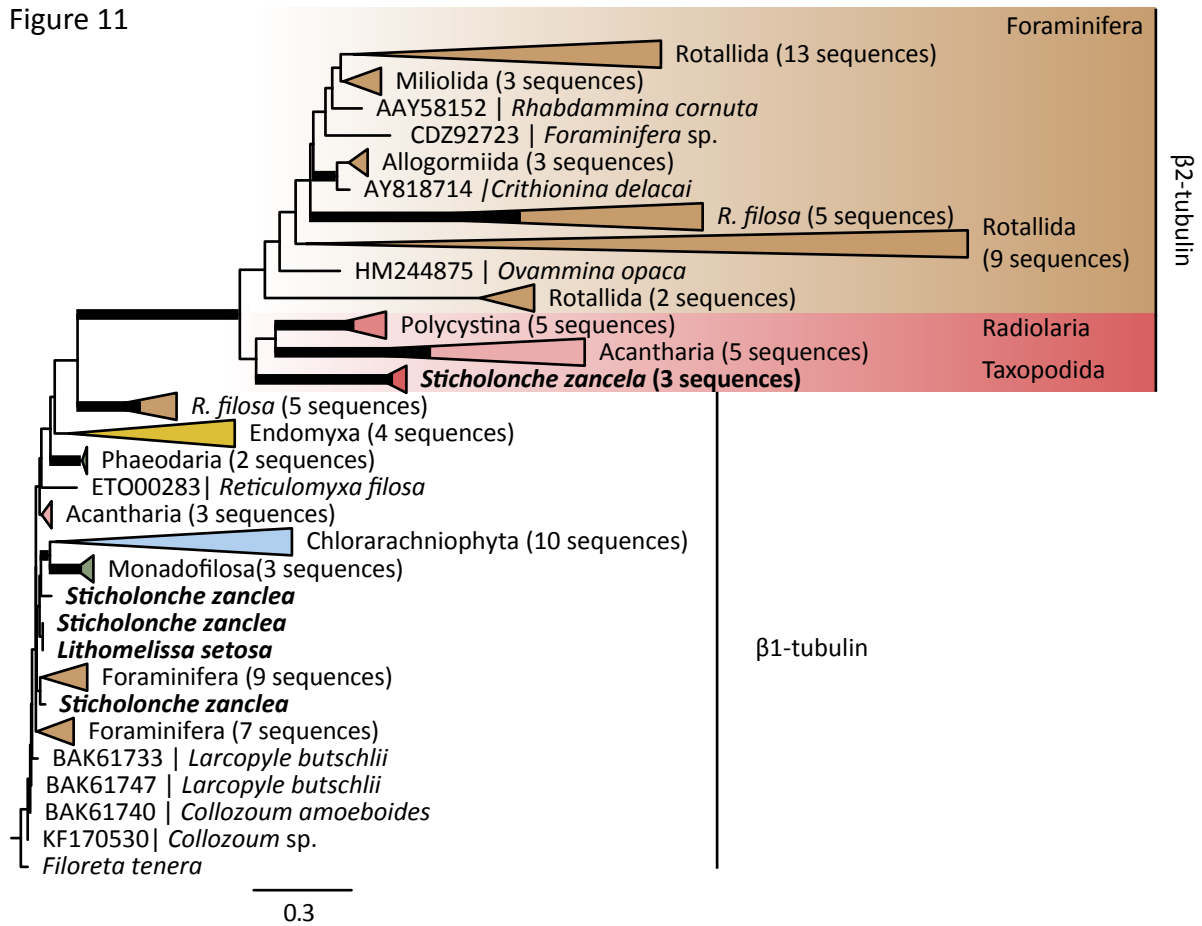

Figure 12

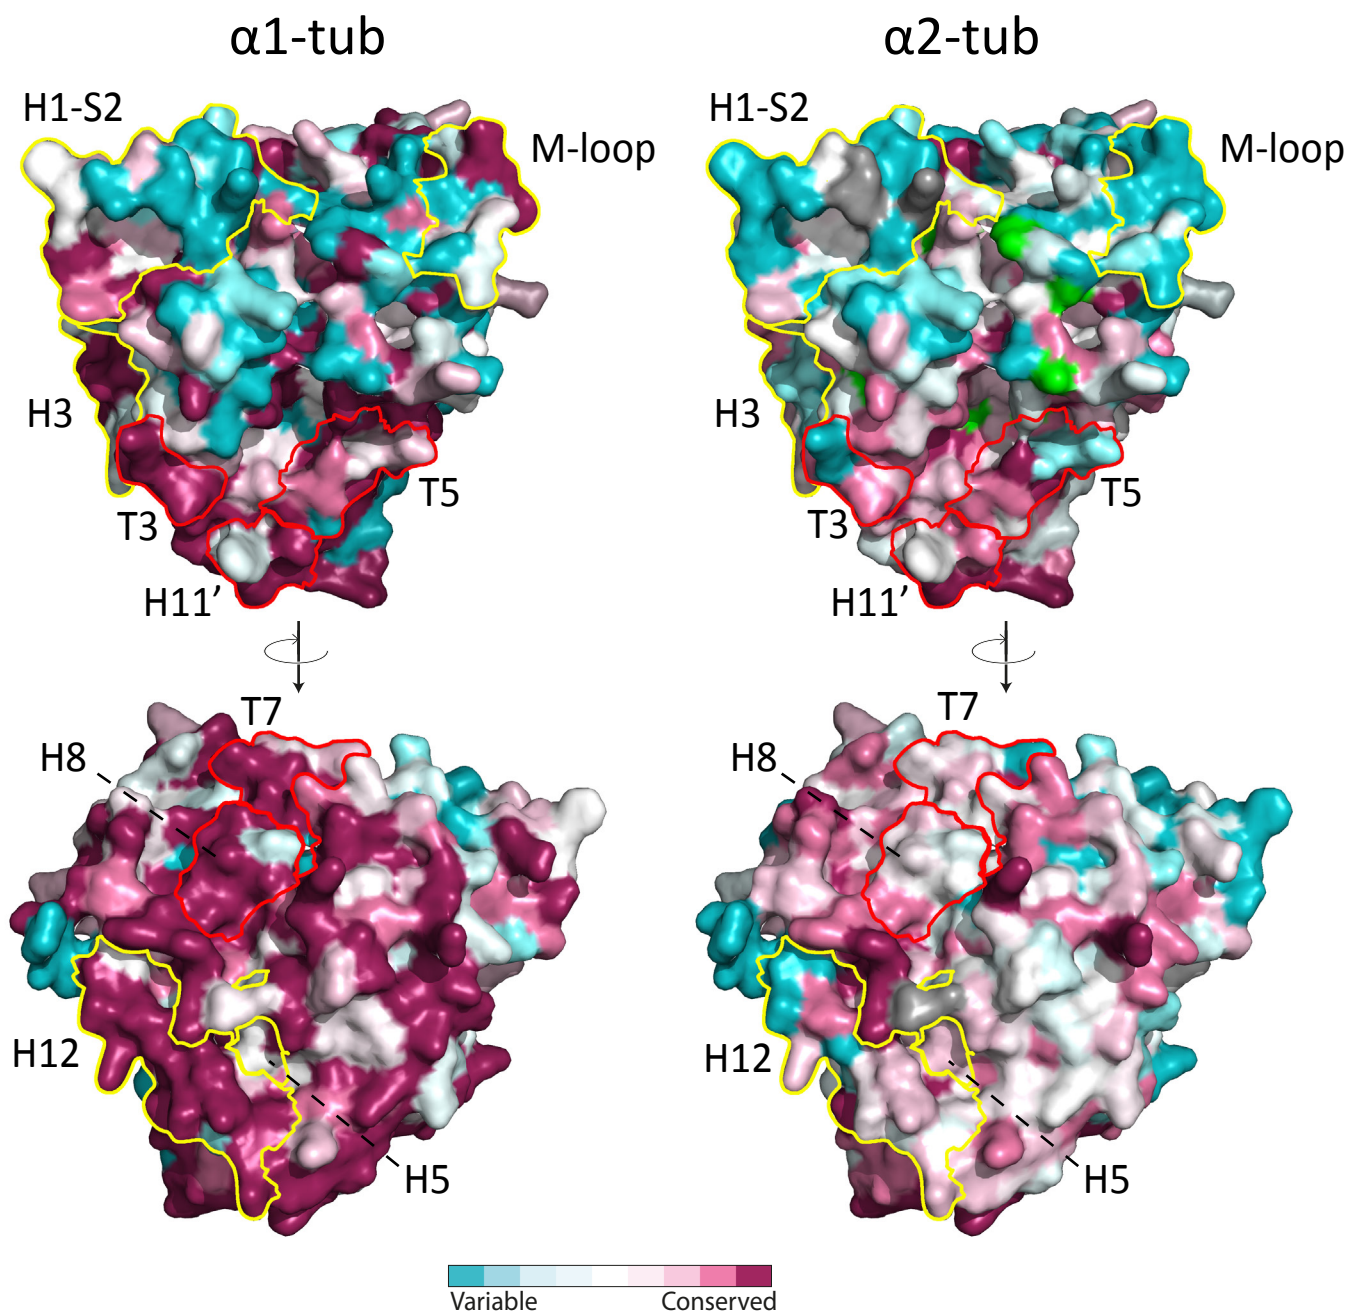



Figure 13

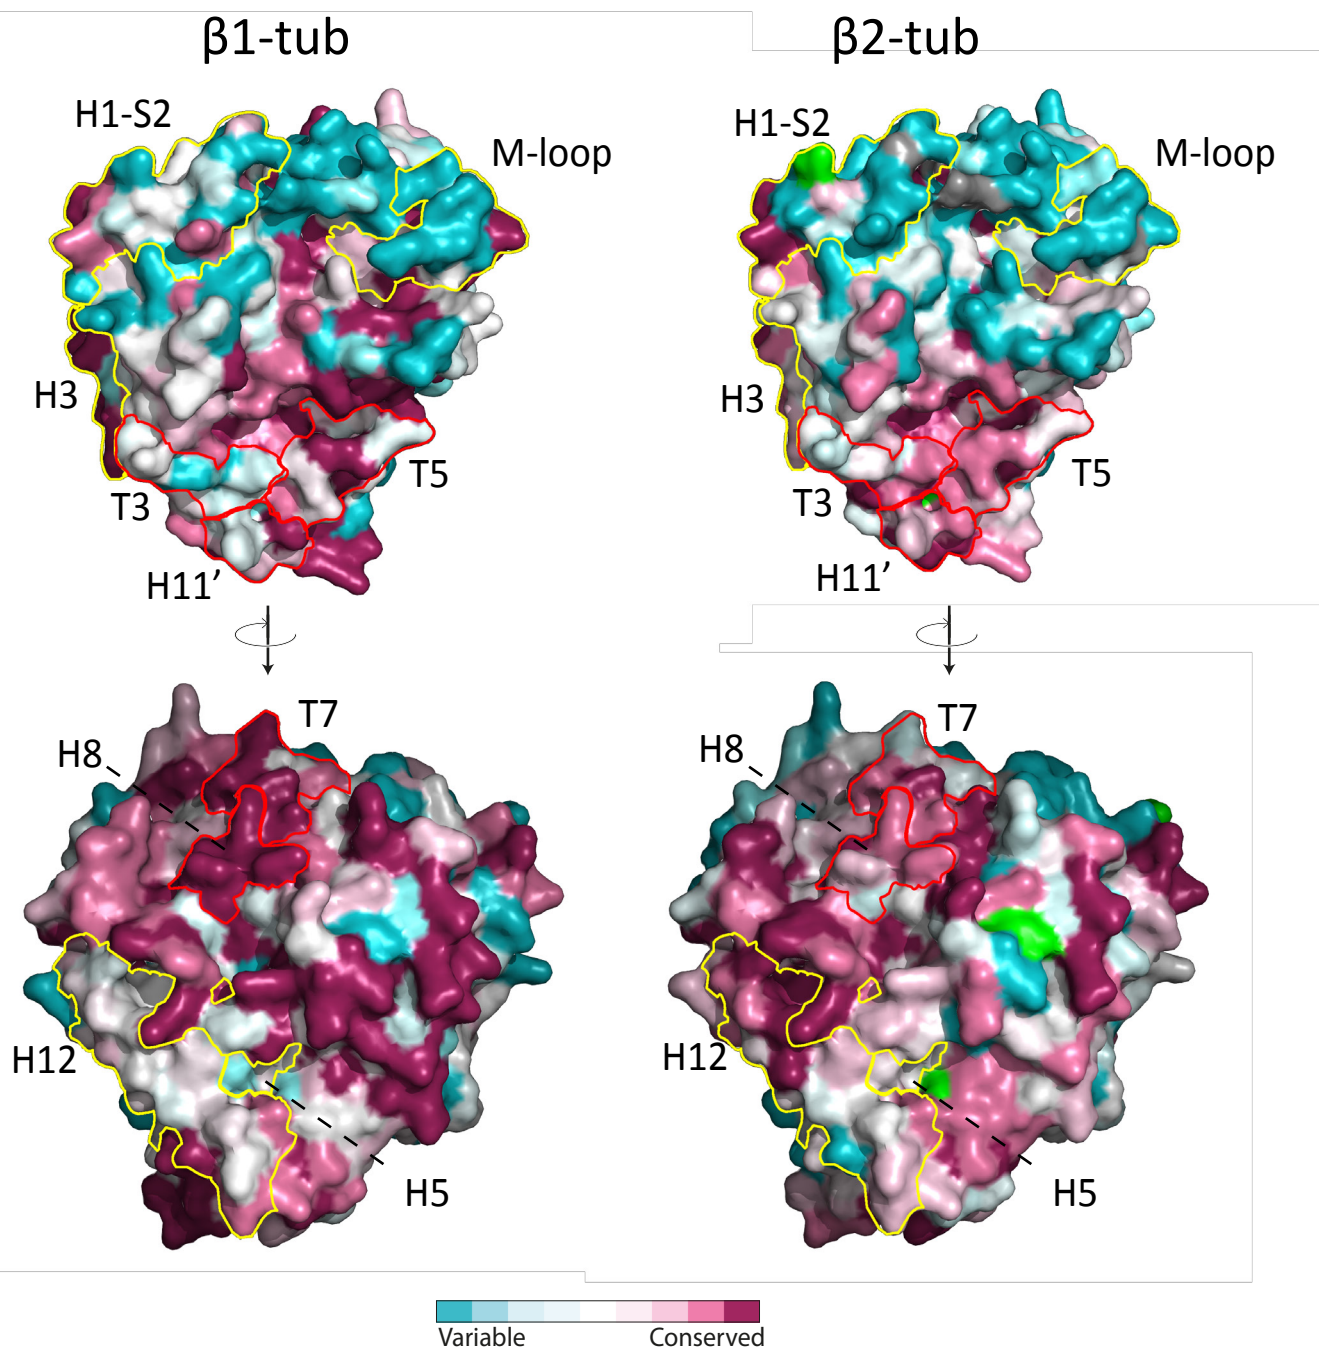

Figure 14

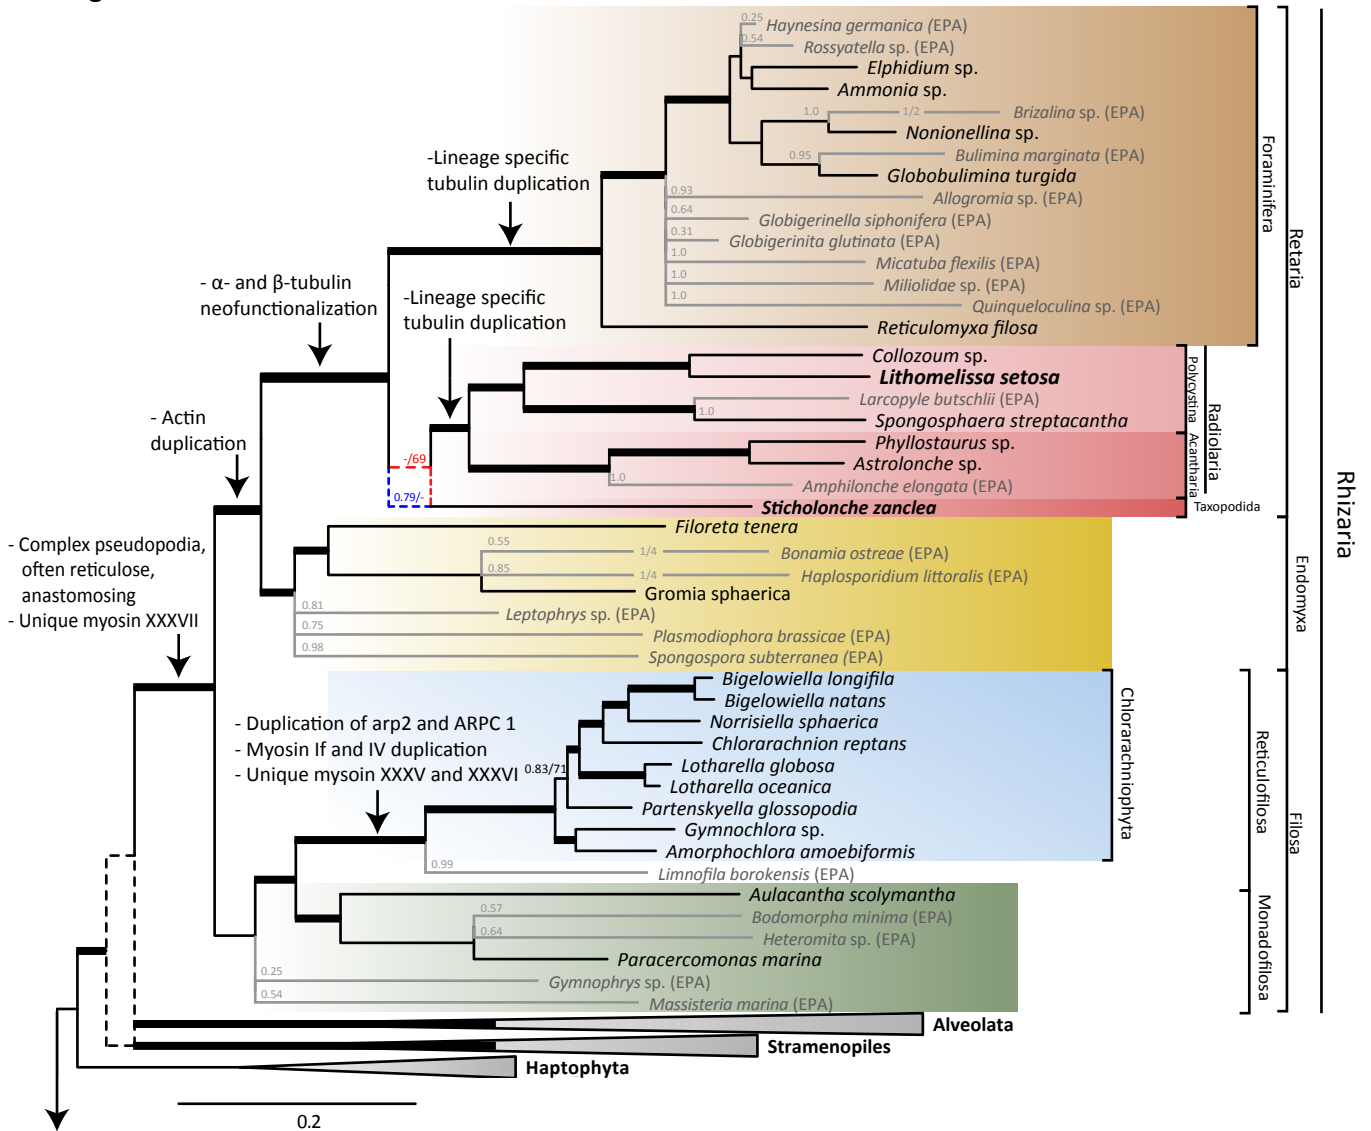

For the rest of the tree, see Fig. 2 (maximum likelihood) and Fig. 3 (Bayesian)

S1 Single gene statistics

**Supplementary table S1:** Statistics for single gene alignments. **Gene name:** Name of the gene alignment, adopted from Burki et. al (2012). **Number of taxa:** The number of taxa in the gene alignment after BIR and selection in ScaFos. **Min seq. length:** The length of the shortest sequence in the alignment in AA. **Max seq. length:** Length of the longest sequence in the alignment in AA. **Pairwise Identity:** Identity calculated for all pairs of sequences in the alignment. **Model:** The model chosen as the best fitting the sequence data in the alignment by RAxML (Stamatakis 2014). **Likelihood of model:** The likelihood of the model chosen by RAxML. **Relative TC and Relative TCA:** Relative Tree Certainty for the phylogenetic tree of the gene calculate from the bootstrap trees (Salichos et al. 2014). **S. zanzlea:** indicates if the newly sequenced *Sticholonche zanzlea* is present in the gene alignment **L. setosa:** indicates if the newly sequenced *Lithomelissa setosa* is present in the gene alignment. **Selected for reduced dataset:** about half of the genes were selected for a smaller dataset. Genes marked with ACCEPT was selected to the 147-genes dataset.

| Gene name   | Number of taxa | Min. Seq. length | Max seq. length | Pairwise Identity | Model | Likelihood of model | Relative TC | Relative TCA | S. zanzlea | L. setosa | Selected for red.dataset |
|-------------|----------------|------------------|-----------------|-------------------|-------|---------------------|-------------|--------------|------------|-----------|--------------------------|
| ABHD13      | 36             | 47               | 137             | 57,00%            | LG    | -5760,505024        | 0,318832    | 0,357927     | 0          | 0         |                          |
| AGX         | 43             | 131              | 270             | 53,30%            | LG    | -13578,0947         | 0,319509    | 0,337786     | 0          | 0         |                          |
| ALG11       | 33             | 86               | 209             | 58,00%            | LG    | -8078,540125        | 0,230892    | 0,301337     | 0          | 0         |                          |
| ap1m1       | 58             | 62               | 256             | 70,60%            | LG    | -8282,246972        | 0,450315    | 0,463256     | 0          | yes       | ACCEPTED                 |
| AP1S2       | 51             | 75               | 109             | 65,40%            | LG    | -3948,823321        | 0,344491    | 0,386934     | 0          | 0         | ACCEPTED                 |
| ap2m1       | 48             | 40               | 202             | 60,00%            | LG    | -7015,548224        | 0,46415     | 0,477977     | 0          | 0         | ACCEPTED                 |
| ap3m1       | 37             | 63               | 189             | 52,80%            | LG    | -6785,573219        | 0,51729     | 0,521267     | 0          | 0         |                          |
| AP3S1       | 46             | 47               | 116             | 64,70%            | LG    | -3638,753749        | 0,290083    | 0,315354     | 0          | 0         |                          |
| AP4S1       | 43             | 79               | 114             | 67,80%            | LG    | -3717,694654        | 0,353887    | 0,356413     | 0          | 0         |                          |
| ARL6        | 21             | 83               | 126             | 59,40%            | LG    | -2850,923763        | 0,48422     | 0,492966     | 0          | 0         |                          |
| ARP2        | 42             | 27               | 157             | 67,20%            | LG    | -4811,863091        | 0,369159    | 0,38038      | 0          | 0         |                          |
| arpc3       | 30             | 43               | 107             | 50,70%            | LG    | -3988,11484         | 0,416454    | 0,431791     | 0          | 0         |                          |
| arpc4       | 45             | 35               | 143             | 60,80%            | LG    | -5306,773776        | 0,289444    | 0,306523     | 0          | 0         | ACCEPTED                 |
| atad1       | 34             | 106              | 152             | 61,70%            | LG    | -4634,564786        | 0,354555    | 0,385238     | 0          | 0         |                          |
| atp6        | 77             | 47               | 127             | 75,70%            | MTZOA | -4423,911594        | 0,2374      | 0,278178     | 0          | 0         | ACCEPTED                 |
| ATP6V0A1    | 61             | 78               | 455             | 52,50%            | LG    | -25700,3205         | 0,381807    | 0,406443     | 0          | 0         | ACCEPTED                 |
| atp6v1a     | 76             | 37               | 447             | 74,10%            | LG    | -14189,67727        | 0,388532    | 0,397548     | 0          | 0         | ACCEPTED                 |
| atp6v1b     | 78             | 69               | 433             | 76,30%            | LG    | -14137,02466        | 0,461456    | 0,473029     | yes        | yes       | ACCEPTED                 |
| atp6v1d     | 64             | 65               | 167             | 55,20%            | LG    | -10167,97542        | 0,339726    | 0,349941     | 0          | 0         | ACCEPTED                 |
| atp6v1e     | 55             | 83               | 138             | 41,30%            | LG    | -11233,94332        | 0,386724    | 0,422531     | 0          | 0         | ACCEPTED                 |
| bat1        | 73             | 88               | 258             | 71,80%            | LG    | -10630,98133        | 0,404242    | 0,438108     | yes        | 0         | ACCEPTED                 |
| C16orf80    | 48             | 91               | 165             | 88,40%            | LG    | -2248,848997        | 0,109672    | 0,189948     | yes        | 0         | ACCEPTED                 |
| C22orf28    | 38             | 91               | 466             | 76,40%            | LG    | -9894,363438        | 0,281505    | 0,336485     | yes        | 0         | ACCEPTED                 |
| calm        | 78             | 49               | 129             | 90,00%            | LG    | -2110,01212         | 0,148728    | 0,192604     | yes        | 0         | ACCEPTED                 |
| calr        | 60             | 57               | 170             | 67,00%            | WAG   | -7815,156224        | 0,231478    | 0,268941     | 0          | 0         | ACCEPTED                 |
| capzb       | 45             | 52               | 139             | 59,00%            | LG    | -5504,958066        | 0,320148    | 0,343714     | 0          | 0         |                          |
| CCDC113     | 18             | 82               | 237             | 51,10%            | LG    | -5508,47554         | 0,539594    | 0,536236     | 0          | 0         |                          |
| CCDC37      | 30             | 90               | 303             | 46,10%            | LG    | -11786,2832         | 0,47835     | 0,503777     | 0          | 0         |                          |
| CCDC40      | 19             | 115              | 467             | 42,60%            | LG    | -12842,83032        | 0,491146    | 0,525936     | 0          | 0         |                          |
| CCDC65      | 25             | 82               | 321             | 42,20%            | LG    | -10626,90619        | 0,420871    | 0,438333     | 0          | 0         |                          |
| CDK5        | 42             | 65               | 280             | 63,40%            | LG    | -9418,462225        | 0,417232    | 0,422685     | yes        | 0         | ACCEPTED                 |
| clgn        | 34             | 48               | 145             | 62,00%            | LG    | -4899,706222        | 0,114411    | 0,173907     | 0          | 0         |                          |
| COP-beta    | 48             | 61               | 243             | 60,00%            | LG    | -9593,223689        | 0,294955    | 0,308558     | 0          | 0         | ACCEPTED                 |
| COPE        | 44             | 123              | 223             | 41,50%            | LG    | -12970,30913        | 0,517069    | 0,526119     | 0          | 0         | ACCEPTED                 |
| COPG2       | 55             | 70               | 509             | 56,20%            | LG    | -23616,91598        | 0,521554    | 0,536455     | yes        | 0         | ACCEPTED                 |
| COP52       | 44             | 89               | 309             | 58,50%            | LG    | -11230,39468        | 0,527241    | 0,541656     | 0          | 0         |                          |
| COP56       | 28             | 123              | 187             | 50,70%            | LG    | -6346,544893        | 0,537547    | 0,560168     | 0          | 0         |                          |
| COQ4_mito   | 36             | 109              | 151             | 49,00%            | LG    | -7280,812689        | 0,401101    | 0,422436     | 0          | 0         |                          |
| CORO1C      | 31             | 97               | 222             | 47,20%            | LG    | -8167,847504        | 0,374021    | 0,403971     | 0          | 0         |                          |
| crfg        | 51             | 76               | 292             | 69,20%            | LG    | -10103,6544         | 0,406951    | 0,411905     | 0          | 0         | ACCEPTED                 |
| CS          | 64             | 77               | 322             | 63,40%            | LG    | -16434,00411        | 0,371514    | 0,398614     | yes        | 0         | ACCEPTED                 |
| CTU1        | 21             | 88               | 268             | 73,10%            | LG    | -4782,043678        | 0,323508    | 0,330796     | 0          | 0         |                          |
| D2HGDH_mito | 44             | 90               | 309             | 58,60%            | LG    | -14265,88235        | 0,283087    | 0,324249     | 0          | 0         | ACCEPTED                 |
| DCAF13      | 52             | 68               | 300             | 55,20%            | LG    | -15029,30276        | 0,40634     | 0,422661     | 0          | 0         | ACCEPTED                 |
| DIMT1L      | 55             | 63               | 183             | 68,60%            | LG    | -6863,39766         | 0,412767    | 0,445715     | 0          | 0         | ACCEPTED                 |
| DNAI2       | 28             | 43               | 230             | 54,30%            | LG    | -6502,660093        | 0,52915     | 0,534576     | 0          | 0         |                          |
| DNAL1       | 25             | 130              | 153             | 54,40%            | LG    | -5228,202384        | 0,446404    | 0,448189     | 0          | 0         |                          |
| dpagt1      | 45             | 76               | 170             | 65,60%            | LG    | -6228,299749        | 0,359216    | 0,402348     | 0          | 0         |                          |
| DPP3        | 15             | 131              | 528             | 41,70%            | LG    | -12511,48145        | 0,401157    | 0,423351     | 0          | 0         |                          |
| DRG2        | 52             | 63               | 245             | 64,70%            | LG    | -9836,526877        | 0,385974    | 0,421983     | 0          | 0         | ACCEPTED                 |
| eef2        | 81             | 94               | 562             | 67,30%            | LG    | -24983,51597        | 0,4763      | 0,494258     | yes        | yes       | ACCEPTED                 |
| EFG_mito    | 41             | 51               | 281             | 75,00%            | LG    | -6495,903547        | 0,223644    | 0,236228     | 0          | 0         |                          |
| EFTUD1      | 31             | 36               | 270             | 60,60%            | LG    | -7839,893152        | 0,363824    | 0,388091     | 0          | 0         |                          |
| eftud2      | 47             | 103              | 322             | 70,00%            | LG    | -9505,018307        | 0,412589    | 0,428361     | 0          | 0         | ACCEPTED                 |
| eif1a       | 66             | 47               | 108             | 69,70%            | LG    | -4471,341828        | 0,297396    | 0,3331       | 0          | 0         | ACCEPTED                 |
| eif2b       | 44             | 72               | 94              | 57,20%            | LG    | -3973,460453        | 0,328507    | 0,348898     | 0          | 0         |                          |
| eif2g       | 58             | 70               | 366             | 76,40%            | LG    | -9647,829098        | 0,36947     | 0,389087     | 0          | 0         | ACCEPTED                 |
| EIF3I       | 52             | 52               | 221             | 51,60%            | LG    | -11650,70359        | 0,425295    | 0,457061     | 0          | 0         | ACCEPTED                 |
| EIF4A3      | 63             | 60               | 203             | 80,80%            | LG    | -4512,305984        | 0,193142    | 0,209894     | yes        | yes       | ACCEPTED                 |

S1 Single gene statistics

|             |    |     |     |        |       |              |          |          |     |     |          |
|-------------|----|-----|-----|--------|-------|--------------|----------|----------|-----|-----|----------|
| EIF4E       | 33 | 72  | 107 | 54,00% | LG    | -4350,586754 | 0,41534  | 0,420327 | 0   | 0   |          |
| EIF5A       | 59 | 43  | 100 | 59,60% | LG    | -5896,500255 | 0,236079 | 0,266349 | 0   | 0   |          |
| EIF5B       | 52 | 66  | 379 | 65,00% | LG    | -14629,03823 | 0,369459 | 0,387896 | 0   | 0   | ACCEPTED |
| EIF6        | 73 | 39  | 189 | 68,90% | LG    | -9203,168463 | 0,316631 | 0,323257 | 0   | 0   | ACCEPTED |
| EMG1        | 50 | 48  | 137 | 58,70% | LG    | -6251,800505 | 0,32807  | 0,364891 | 0   | 0   | ACCEPTED |
| ERLIN1      | 26 | 58  | 270 | 58,10% | LG    | -6995,632051 | 0,446725 | 0,475001 | 0   | 0   |          |
| ETF1        | 62 | 82  | 326 | 74,40% | LG    | -10397,59059 | 0,282949 | 0,3303   | 0   | 0   | ACCEPTED |
| FA2H        | 22 | 100 | 138 | 56,10% | LG    | -3792,536181 | 0,362447 | 0,376038 | 0   | 0   |          |
| FAM18B      | 39 | 55  | 106 | 48,40% | MTZOA | -5587,027958 | 0,031813 | 0,111896 | 0   | 0   |          |
| FAM96B      | 40 | 47  | 111 | 66,70% | LG    | -3987,056771 | 0,156244 | 0,1794   | 0   | 0   |          |
| FBL         | 64 | 50  | 195 | 74,00% | LG    | -7444,494885 | 0,389779 | 0,422724 | yes | 0   | ACCEPTED |
| FTSJ1       | 49 | 88  | 165 | 66,80% | LG    | -6088,454206 | 0,366011 | 0,379057 | 0   | 0   | ACCEPTED |
| GAS8        | 32 | 81  | 372 | 44,90% | LG    | -12643,31147 | 0,491982 | 0,508781 | 0   | 0   |          |
| GLI2        | 72 | 46  | 212 | 61,80% | LG    | -11089,82621 | 0,333202 | 0,358492 | 0   | 0   | ACCEPTED |
| GNB2L1      | 79 | 48  | 192 | 75,20% | LG    | -8732,103713 | 0,265904 | 0,306306 | yes | yes | ACCEPTED |
| GPD1L       | 37 | 101 | 221 | 61,30% | LG    | -7689,745256 | 0,37787  | 0,406056 | 0   | 0   |          |
| GPN1        | 56 | 45  | 144 | 71,20% | LG    | -5363,738803 | 0,212174 | 0,27348  | 0   | 0   | ACCEPTED |
| GPN2        | 41 | 32  | 162 | 55,70% | LG    | -6613,807943 | 0,30105  | 0,342609 | 0   | 0   |          |
| GPN3        | 46 | 50  | 156 | 61,30% | LG    | -6745,689652 | 0,364161 | 0,370243 | 0   | 0   | ACCEPTED |
| GRWD1       | 45 | 85  | 193 | 55,90% | LG    | -8675,085077 | 0,328738 | 0,367185 | 0   | 0   | ACCEPTED |
| GSS         | 34 | 114 | 218 | 54,40% | LG    | -9180,431006 | 0,316714 | 0,349284 | 0   | 0   |          |
| H2A         | 71 | 81  | 104 | 78,90% | LG    | -3316,468046 | 0,179693 | 0,235261 | 0   | 0   |          |
| H2B         | 51 | 79  | 98  | 75,60% | LG    | -2796,842548 | 0,28254  | 0,293791 | 0   | 0   | ACCEPTED |
| H3-2        | 72 | 58  | 129 | 91,60% | LG    | -2055,800843 | 0,098365 | 0,155827 | yes | 0   |          |
| H4          | 55 | 65  | 99  | 92,10% | LG    | -1122,507982 | 0,101839 | 0,133267 | 0   | 0   | ACCEPTED |
| HDCC2       | 35 | 74  | 119 | 59,60% | LG    | -4442,215557 | 0,164491 | 0,184876 | 0   | 0   |          |
| HSP90       | 83 | 66  | 415 | 75,30% | LG    | -17790,87246 | 0,346099 | 0,362569 | yes | 0   | ACCEPTED |
| HYOU1       | 33 | 80  | 223 | 48,00% | LG    | -8724,657423 | 0,486438 | 0,488844 | 0   | 0   |          |
| IFT46       | 33 | 88  | 174 | 58,20% | LG    | -5956,901367 | 0,264837 | 0,299679 | yes | 0   |          |
| IFT57       | 27 | 93  | 260 | 39,40% | LG    | -10551,41885 | 0,404256 | 0,426612 | 0   | 0   |          |
| IFT88       | 34 | 92  | 458 | 51,10% | LG    | -16827,41096 | 0,501749 | 0,515524 | 0   | 0   |          |
| IMP4        | 54 | 79  | 202 | 62,90% | LG    | -9421,343366 | 0,325505 | 0,371947 | 0   | 0   |          |
| INO1        | 61 | 41  | 344 | 70,00% | LG    | -14295,91978 | 0,217782 | 0,283593 | 0   | yes | ACCEPTED |
| IPO4        | 30 | 84  | 376 | 38,80% | LG    | -15957,99189 | 0,591417 | 0,598396 | 0   | 0   |          |
| KARS        | 62 | 62  | 264 | 70,80% | LG    | -10600,97116 | 0,214743 | 0,2715   | 0   | 0   | ACCEPTED |
| KDEL2       | 49 | 77  | 156 | 59,10% | LG    | -7062,524635 | 0,434685 | 0,441327 | yes | 0   | ACCEPTED |
| LRRC48      | 23 | 104 | 293 | 42,10% | LG    | -9179,427104 | 0,430746 | 0,43918  | 0   | 0   |          |
| MAT1A       | 64 | 71  | 260 | 75,30% | LG    | -8605,46176  | 0,412943 | 0,422438 | 0   | 0   | ACCEPTED |
| MCM2        | 50 | 90  | 263 | 73,80% | LG    | -8012,514112 | 0,315807 | 0,340618 | yes | yes | ACCEPTED |
| MCM3        | 51 | 93  | 271 | 72,50% | LG    | -9047,602802 | 0,30263  | 0,325999 | yes | 0   | ACCEPTED |
| MCM4        | 44 | 81  | 296 | 70,10% | LG    | -9420,901756 | 0,393779 | 0,405547 | yes | 0   | ACCEPTED |
| MCM5        | 45 | 46  | 246 | 74,20% | LG    | -7002,009287 | 0,501695 | 0,516008 | 0   | yes | ACCEPTED |
| MCM6        | 52 | 77  | 299 | 70,30% | LG    | -9645,961336 | 0,429845 | 0,469787 | yes | 0   | ACCEPTED |
| MCM7        | 51 | 62  | 263 | 72,40% | LG    | -8287,185832 | 0,356912 | 0,366708 | 0   | 0   |          |
| MCM8        | 29 | 76  | 249 | 65,10% | LG    | -6245,43182  | 0,354433 | 0,373885 | 0   | 0   |          |
| MCM9        | 29 | 143 | 255 | 64,60% | LG    | -6777,807545 | 0,312351 | 0,329352 | 0   | 0   |          |
| MEMO1       | 38 | 44  | 168 | 60,10% | LG    | -6043,619772 | 0,262226 | 0,299762 | 0   | 0   |          |
| METAP2      | 65 | 46  | 258 | 68,80% | LG    | -11415,57471 | 0,254494 | 0,270575 | 0   | 0   | ACCEPTED |
| METTL1      | 54 | 77  | 160 | 55,60% | LG    | -8932,773544 | 0,396241 | 0,40591  | 0   | 0   | ACCEPTED |
| MMAA_mito   | 26 | 109 | 250 | 53,90% | LG    | -7212,012798 | 0,346028 | 0,362445 | 0   | 0   |          |
| MTHFR       | 45 | 65  | 334 | 63,30% | LG    | -11874,32317 | 0,323083 | 0,343072 | 0   | 0   | ACCEPTED |
| NAA15       | 47 | 66  | 431 | 47,70% | LG    | -23715,45616 | 0,418084 | 0,435806 | 0   | 0   | ACCEPTED |
| NAE1        | 31 | 136 | 236 | 52,20% | LG    | -9548,540186 | 0,342409 | 0,373591 | 0   | 0   |          |
| NAPB        | 44 | 93  | 199 | 42,50% | LG    | -12243,68002 | 0,332845 | 0,365541 | 0   | 0   |          |
| NDUFV1      | 62 | 75  | 402 | 73,80% | LG    | -12540,76853 | 0,376573 | 0,403972 | 0   | 0   | ACCEPTED |
| NDUFV2_mito | 51 | 54  | 155 | 58,60% | LG    | -7609,888533 | 0,398947 | 0,408587 | 0   | 0   | ACCEPTED |
| NFS1_mito   | 61 | 46  | 232 | 75,50% | LG    | -7853,794077 | 0,193981 | 0,243005 | 0   | 0   | ACCEPTED |
| NHP2        | 37 | 41  | 68  | 62,10% | LG    | -2330,871773 | 0,167164 | 0,230068 | 0   | 0   |          |
| NHP2L1      | 52 | 99  | 115 | 72,30% | LG    | -3873,133239 | 0,202258 | 0,248085 | 0   | 0   | ACCEPTED |
| NLN_mito    | 30 | 78  | 381 | 48,60% | LG    | -14240,63183 | 0,421332 | 0,44309  | 0   | 0   |          |
| NOP56       | 60 | 96  | 281 | 67,10% | LG    | -11882,5291  | 0,338887 | 0,362741 | yes | 0   | ACCEPTED |
| NOP58       | 55 | 45  | 213 | 74,40% | LG    | -7000,149845 | 0,231158 | 0,263766 | 0   | 0   | ACCEPTED |
| NSA2        | 64 | 68  | 240 | 72,40% | LG    | -9499,737422 | 0,303197 | 0,325586 | 0   | 0   | ACCEPTED |
| NSF         | 53 | 65  | 270 | 69,00% | LG    | -9891,769117 | 0,374889 | 0,39972  | 0   | 0   |          |
| OPAH        | 38 | 50  | 564 | 64,90% | LG    | -14938,31009 | 0,394035 | 0,411375 | 0   | 0   |          |
| ORF1        | 16 | 57  | 134 | 54,50% | LG    | -2767,405751 | 0,422535 | 0,458527 | 0   | 0   |          |
| OSGEP       | 46 | 59  | 259 | 73,60% | LG    | -7878,100778 | 0,251901 | 0,259963 | 0   | 0   |          |
| PABPC4      | 52 | 80  | 293 | 62,30% | LG    | -13166,19715 | 0,439501 | 0,458006 | 0   | 0   |          |
| PACRG       | 38 | 70  | 160 | 67,00% | LG    | -3910,462495 | 0,451179 | 0,462882 | 0   | 0   |          |
| PIK3C3      | 29 | 81  | 304 | 57,80% | LG    | -8753,142845 | 0,378127 | 0,390866 | 0   | 0   |          |
| PLS3        | 46 | 72  | 299 | 56,40% | LG    | -12508,93565 | 0,331283 | 0,355786 | 0   | 0   |          |
| PMM2        | 56 | 80  | 196 | 63,40% | LG    | -10196,48796 | 0,28168  | 0,318027 | 0   | 0   | ACCEPTED |

S1 Single gene statistics

|         |    |     |     |        |          |              |           |          |     |     |          |
|---------|----|-----|-----|--------|----------|--------------|-----------|----------|-----|-----|----------|
| pno1    | 52 | 82  | 147 | 64,60% | LG       | -5798,528592 | 0,321841  | 0,346093 | 0   | 0   | ACCEPTED |
| polr2a  | 58 | 38  | 772 | 67,80% | LG       | -28598,87753 | 0,501619  | 0,51791  | 0   | 0   | ACCEPTED |
| polr3a  | 44 | 35  | 722 | 64,70% | LG       | -25416,11427 | 0,448526  | 0,453603 | 0   | 0   | ACCEPTED |
| PPP2R3  | 51 | 98  | 216 | 51,10% | LG       | -10956,80171 | 0,33061   | 0,357455 | yes | 0   | ACCEPTED |
| PPP2R5C | 53 | 100 | 254 | 65,40% | LG       | -9093,0928   | 0,452387  | 0,470386 | yes | 0   | ACCEPTED |
| prmt8   | 56 | 70  | 193 | 68,40% | LG       | -7952,374899 | 0,115864  | 0,189454 | yes | 0   | ACCEPTED |
| PROSC   | 40 | 68  | 146 | 61,30% | LG       | -6082,345294 | 0,167065  | 0,217243 | 0   | 0   | ACCEPTED |
| psma1   | 59 | 60  | 137 | 67,50% | LG       | -5245,198916 | 0,280318  | 0,306409 | 0   | 0   | ACCEPTED |
| psma2   | 58 | 63  | 121 | 76,10% | LG       | -3542,825171 | 0,250677  | 0,29696  | 0   | 0   | ACCEPTED |
| psma3   | 59 | 70  | 135 | 60,10% | LG       | -6965,175678 | 0,308209  | 0,344862 | 0   | 0   |          |
| psma4   | 52 | 52  | 128 | 72,50% | LG       | -4080,020923 | 0,355296  | 0,383875 | 0   | 0   | ACCEPTED |
| psma6   | 54 | 37  | 126 | 64,70% | LG       | -5607,745264 | 0,29337   | 0,322105 | 0   | 0   | ACCEPTED |
| psma7   | 74 | 93  | 171 | 69,20% | LG       | -7389,740101 | 0,387995  | 0,40465  | yes | 0   | ACCEPTED |
| psmb1   | 49 | 43  | 107 | 62,90% | LG       | -4522,89283  | 0,189984  | 0,264529 | 0   | 0   |          |
| psmb2   | 48 | 57  | 136 | 51,30% | LG       | -7681,533281 | 0,299603  | 0,336806 | 0   | 0   | ACCEPTED |
| psmb3   | 63 | 38  | 155 | 60,60% | LG       | -8500,309613 | 0,206209  | 0,269064 | 0   | 0   | ACCEPTED |
| psmb4   | 60 | 31  | 127 | 56,10% | LG       | -7943,98869  | 0,345529  | 0,364564 | 0   | 0   | ACCEPTED |
| psmb5   | 67 | 39  | 165 | 67,70% | LG       | -7447,399713 | 0,320037  | 0,332597 | yes | 0   | ACCEPTED |
| psmb6   | 61 | 69  | 156 | 60,90% | LG       | -8273,200252 | 0,245688  | 0,285231 | yes | 0   | ACCEPTED |
| psmb7   | 59 | 79  | 167 | 71,60% | LG       | -6434,285244 | 0,257649  | 0,308525 | 0   | 0   | ACCEPTED |
| psmc1   | 62 | 17  | 231 | 85,30% | LG       | -4624,959992 | 0,221607  | 0,227897 | yes | 0   | ACCEPTED |
| psmc2   | 62 | 69  | 192 | 86,10% | LG       | -3452,946091 | 0,257755  | 0,276869 | yes | 0   | ACCEPTED |
| psmc3   | 65 | 68  | 205 | 82,00% | LG       | -5119,32424  | 0,233063  | 0,257247 | yes | yes | ACCEPTED |
| psmc4   | 65 | 62  | 217 | 85,70% | LG       | -4527,047494 | 0,228069  | 0,257664 | yes | 0   | ACCEPTED |
| psmc5   | 62 | 77  | 227 | 87,50% | LG       | -4087,161508 | 0,22135   | 0,245021 | yes | 0   | ACCEPTED |
| psmc6   | 57 | 79  | 205 | 85,00% | LG       | -3653,729711 | 0,336373  | 0,34444  | 0   | 0   | ACCEPTED |
| psmd1   | 60 | 47  | 399 | 59,60% | LG       | -19493,56751 | 0,327354  | 0,349363 | 0   | 0   | ACCEPTED |
| PSMD12  | 60 | 58  | 254 | 50,40% | LG       | -14784,39862 | 0,386045  | 0,41888  | 0   | 0   | ACCEPTED |
| psmd14  | 63 | 63  | 257 | 74,40% | LG       | -9323,920868 | 0,316358  | 0,343751 | 0   | 0   | ACCEPTED |
| PYGB    | 37 | 95  | 544 | 59,90% | LG       | -17011,34898 | 0,452082  | 0,462753 | 0   | 0   |          |
| rad51   | 40 | 44  | 256 | 67,80% | LG       | -7401,132592 | 0,400212  | 0,420737 | 0   | 0   |          |
| ran     | 76 | 92  | 165 | 80,20% | LG       | -4827,137813 | 0,29601   | 0,325396 | yes | 0   | ACCEPTED |
| RBX1    | 42 | 53  | 81  | 84,50% | JTTDCMUT | -1321,38173  | 0,160756  | 0,207393 | 0   | 0   |          |
| RPF1    | 44 | 78  | 174 | 57,00% | LG       | -7822,702904 | 0,227766  | 0,307594 | 0   | 0   |          |
| rpl10   | 83 | 61  | 159 | 74,40% | LG       | -7018,621297 | 0,335667  | 0,35485  | 0   | 0   | ACCEPTED |
| rpl10a  | 67 | 45  | 161 | 64,90% | LG       | -9013,950253 | 0,328544  | 0,354329 | 0   | 0   | ACCEPTED |
| rpl11   | 79 | 69  | 152 | 70,00% | LG       | -8075,80399  | 0,257236  | 0,298261 | yes | 0   | ACCEPTED |
| rpl12   | 67 | 79  | 123 | 66,00% | LG       | -6772,058452 | 0,263227  | 0,305638 | yes | 0   | ACCEPTED |
| rpl13   | 59 | 33  | 103 | 63,60% | LG       | -5917,390741 | 0,142489  | 0,191396 | 0   | 0   |          |
| rpl13a  | 76 | 49  | 147 | 60,00% | LG       | -10377,96112 | 0,181501  | 0,248287 | 0   | 0   | ACCEPTED |
| rpl14   | 55 | 58  | 106 | 46,50% | LG       | -8034,119988 | 0,091558  | 0,14002  | 0   | 0   |          |
| rpl15   | 84 | 68  | 175 | 69,90% | LG       | -9673,89018  | 0,32926   | 0,369159 | yes | yes | ACCEPTED |
| rpl17   | 63 | 72  | 113 | 64,70% | LG       | -5723,051921 | 0,246751  | 0,280843 | 0   | 0   | ACCEPTED |
| rpl18   | 55 | 41  | 112 | 70,30% | LG       | -4767,156378 | 0,114703  | 0,152984 | 0   | 0   | ACCEPTED |
| rpl18a  | 66 | 51  | 91  | 60,90% | LG       | -5269,811383 | 0,303035  | 0,316073 | 0   | 0   |          |
| rpl19   | 76 | 70  | 141 | 69,10% | LG       | -7501,80192  | 0,286695  | 0,336505 | 0   | 0   | ACCEPTED |
| rpl21   | 57 | 62  | 97  | 62,10% | LG       | -5129,179991 | 0,267927  | 0,299892 | 0   | 0   | ACCEPTED |
| rpl24   | 50 | 55  | 74  | 50,20% | LG       | -4410,209795 | 0,319932  | 0,32644  | 0   | 0   |          |
| rpl26   | 67 | 44  | 99  | 67,70% | LG       | -4801,451332 | 0,214933  | 0,25063  | 0   | 0   | ACCEPTED |
| rpl3    | 88 | 55  | 311 | 70,50% | LG       | -18214,71205 | 0,36935   | 0,395013 | yes | yes | ACCEPTED |
| rpl30   | 59 | 50  | 79  | 68,80% | LG       | -3682,374608 | 0,072009  | 0,128008 | 0   | 0   |          |
| rpl31   | 55 | 49  | 74  | 59,60% | LG       | -4354,221301 | 0,128679  | 0,147874 | 0   | 0   |          |
| rpl32   | 51 | 57  | 97  | 65,50% | LG       | -4399,083884 | 0,184069  | 0,218971 | 0   | 0   |          |
| rpl35   | 53 | 33  | 89  | 58,40% | RTREV    | -5252,732522 | 0,160468  | 0,225778 | 0   | 0   |          |
| rpl35a  | 68 | 50  | 90  | 56,90% | LG       | -6333,63494  | 0,227962  | 0,272497 | 0   | 0   | ACCEPTED |
| rpl36a  | 61 | 43  | 81  | 72,10% | LG       | -3333,656145 | 0,194011  | 0,224686 | 0   | 0   |          |
| rpl37a  | 56 | 24  | 85  | 67,50% | LG       | -3716,721948 | 0,204181  | 0,22087  | 0   | 0   |          |
| rpl4    | 76 | 43  | 198 | 68,30% | LG       | -11227,56917 | 0,182645  | 0,252107 | yes | yes | ACCEPTED |
| rpl5    | 73 | 43  | 144 | 68,10% | LG       | -8208,175351 | 0,212312  | 0,213534 | 0   | 0   |          |
| rpl6    | 53 | 22  | 94  | 67,60% | LG       | -4388,032474 | -0,043405 | 0,02437  | 0   | 0   |          |
| rpl7    | 82 | 69  | 149 | 62,50% | LG       | -10755,8653  | 0,287812  | 0,332822 | 0   | 0   | ACCEPTED |
| rpl7a   | 81 | 36  | 132 | 65,90% | LG       | -8859,248599 | 0,274114  | 0,318738 | 0   | 0   | ACCEPTED |
| rpl8    | 77 | 124 | 240 | 67,90% | LG       | -13793,04187 | 0,311511  | 0,352076 | yes | 0   | ACCEPTED |
| rpl9    | 64 | 53  | 115 | 64,50% | LG       | -6691,555067 | 0,196335  | 0,260506 | 0   | 0   |          |
| rplp0   | 78 | 40  | 180 | 51,10% | LG       | -15763,68346 | 0,381238  | 0,389908 | 0   | 0   | ACCEPTED |
| rps10   | 40 | 62  | 75  | 63,20% | LG       | -2814,409652 | 0,244271  | 0,28835  | 0   | 0   |          |
| rps11   | 73 | 50  | 107 | 71,80% | LG       | -5361,813968 | 0,219257  | 0,26323  | yes | 0   | ACCEPTED |
| rps12   | 54 | 57  | 94  | 60,40% | LG       | -4519,596208 | 0,314607  | 0,341976 | 0   | 0   |          |
| rps13   | 75 | 44  | 128 | 73,70% | LG       | -5701,230706 | 0,212594  | 0,241174 | 0   | 0   | ACCEPTED |
| rps14   | 64 | 48  | 127 | 83,50% | LG       | -3390,476476 | 0,180371  | 0,231673 | 0   | yes |          |
| rps15   | 61 | 31  | 98  | 71,60% | LG       | -4180,540985 | 0,20494   | 0,23828  | 0   | 0   |          |
| rps15a  | 73 | 62  | 129 | 73,30% | LG       | -5860,161627 | 0,197495  | 0,227841 | yes | 0   | ACCEPTED |

S1 Single gene statistics

|              |    |     |     |        |          |              |          |          |     |     |          |
|--------------|----|-----|-----|--------|----------|--------------|----------|----------|-----|-----|----------|
| rps16        | 61 | 65  | 124 | 72,70% | LG       | -4965,414355 | 0,136972 | 0,165743 | yes | 0   | ACCEPTED |
| rps17        | 53 | 38  | 83  | 78,40% | LG       | -2181,131702 | 0,246075 | 0,271472 | 0   | 0   |          |
| rps18        | 72 | 56  | 117 | 70,20% | LG       | -5474,465755 | 0,26954  | 0,318506 | yes | 0   | ACCEPTED |
| rps2         | 78 | 47  | 190 | 71,90% | LG       | -9334,854998 | 0,252889 | 0,298213 | yes | yes | ACCEPTED |
| rps20        | 64 | 48  | 91  | 74,60% | LG       | -3381,434534 | 0,169691 | 0,206879 | 0   | 0   |          |
| rps23        | 75 | 62  | 126 | 79,50% | LG       | -4486,572429 | 0,318774 | 0,334894 | 0   | 0   | ACCEPTED |
| rps26        | 61 | 40  | 85  | 61,30% | LG       | -4199,599607 | 0,299643 | 0,313042 | 0   | 0   |          |
| rps27        | 52 | 35  | 65  | 75,00% | LG       | -2194,238872 | 0,156599 | 0,213324 | 0   | 0   |          |
| rps3         | 78 | 59  | 178 | 74,30% | LG       | -7468,33651  | 0,208557 | 0,247935 | 0   | 0   | ACCEPTED |
| rps3a        | 75 | 25  | 204 | 62,00% | LG       | -12542,94964 | 0,31865  | 0,355165 | 0   | 0   | ACCEPTED |
| rps4y1       | 81 | 58  | 218 | 63,00% | LG       | -15664,68245 | 0,354728 | 0,379183 | yes | 0   | ACCEPTED |
| rps5         | 70 | 68  | 162 | 75,40% | LG       | -5794,456167 | 0,319957 | 0,334876 | 0   | 0   | ACCEPTED |
| rps6         | 68 | 104 | 169 | 64,80% | LG       | -10147,66672 | 0,325746 | 0,348633 | yes | yes | ACCEPTED |
| rps8         | 68 | 37  | 147 | 70,60% | LG       | -7105,316255 | 0,203985 | 0,24948  | 0   | 0   | ACCEPTED |
| rps9         | 46 | 45  | 162 | 68,20% | LG       | -5623,640554 | 0,303148 | 0,332849 | 0   | 0   | ACCEPTED |
| rpsa         | 56 | 54  | 169 | 65,90% | LG       | -7072,3259   | 0,35915  | 0,38947  | 0   | 0   |          |
| RRM1         | 58 | 36  | 564 | 71,10% | LG       | -20008,85311 | 0,423029 | 0,439685 | yes | 0   | ACCEPTED |
| sars         | 56 | 96  | 237 | 67,40% | LG       | -9924,277015 | 0,346782 | 0,361108 | 0   | 0   | ACCEPTED |
| SCO1_mito    | 42 | 66  | 123 | 54,40% | LG       | -5480,379693 | 0,257199 | 0,301144 | 0   | 0   | ACCEPTED |
| sec61        | 78 | 73  | 399 | 70,80% | LG       | -16785,0376  | 0,383642 | 0,39609  | yes | 0   | ACCEPTED |
| SND1         | 34 | 255 | 443 | 44,50% | LG       | -19473,31849 | 0,519936 | 0,539994 | 0   | 0   |          |
| SORCS3       | 21 | 72  | 207 | 47,50% | LG       | -6614,66172  | 0,436617 | 0,448523 | 0   | 0   |          |
| SPTLC1       | 28 | 153 | 173 | 53,90% | LG       | -5674,688333 | 0,454531 | 0,490133 | 0   | 0   |          |
| srp54        | 67 | 58  | 304 | 64,30% | LG       | -12873,87608 | 0,274982 | 0,314687 | 0   | 0   |          |
| srpr         | 57 | 57  | 157 | 72,10% | LG       | -4987,352766 | 0,309341 | 0,331631 | 0   | 0   | ACCEPTED |
| STXBP1       | 30 | 138 | 200 | 45,10% | LG       | -8270,480822 | 0,437103 | 0,459147 | 0   | 0   |          |
| suclg1       | 70 | 54  | 238 | 75,50% | LG       | -9519,676276 | 0,292659 | 0,335853 | yes | 0   | ACCEPTED |
| tbp          | 43 | 39  | 142 | 69,60% | LG       | -4720,390277 | 0,172201 | 0,213067 | yes | 0   | ACCEPTED |
| tcp1-alpha   | 50 | 70  | 267 | 73,50% | LG       | -7326,908482 | 0,324951 | 0,349667 | 0   | 0   |          |
| tcp1-beta    | 57 | 34  | 285 | 71,00% | LG       | -8833,546155 | 0,208771 | 0,24571  | 0   | 0   | ACCEPTED |
| tcp1-delta   | 63 | 43  | 280 | 70,80% | LG       | -9007,103802 | 0,330709 | 0,353747 | yes | 0   | ACCEPTED |
| tcp1-epsilon | 68 | 58  | 243 | 72,50% | LG       | -7502,59552  | 0,260491 | 0,312204 | yes | 0   | ACCEPTED |
| tcp1-eta     | 59 | 54  | 273 | 70,70% | LG       | -9944,671421 | 0,315724 | 0,348581 | 0   | 0   | ACCEPTED |
| tcp1-gamma   | 43 | 66  | 226 | 71,60% | LG       | -5856,5992   | 0,312327 | 0,328966 | 0   | 0   |          |
| tcp1-theta   | 46 | 30  | 172 | 63,20% | LG       | -5905,817557 | 0,343444 | 0,361182 | 0   | 0   |          |
| tcp1-zeta    | 51 | 42  | 212 | 66,50% | LG       | -7354,641576 | 0,297075 | 0,343551 | 0   | 0   |          |
| TM9SF1       | 49 | 22  | 218 | 57,50% | MTZOA    | -7848,370323 | 0,324587 | 0,350012 | 0   | 0   | ACCEPTED |
| tubg         | 58 | 95  | 340 | 76,70% | LG       | -9313,404275 | 0,345022 | 0,375534 | 0   | 0   |          |
| UBA3         | 45 | 45  | 142 | 69,00% | LG       | -4447,790728 | 0,234178 | 0,24643  | 0   | 0   |          |
| ubc          | 78 | 50  | 67  | 94,00% | JTTDCMUT | -651,559846  | 0,068042 | 0,105242 | 0   | 0   |          |
| UBE2J2       | 44 | 59  | 109 | 63,60% | LG       | -4583,840059 | 0,267364 | 0,277833 | 0   | 0   | ACCEPTED |
| VAR5         | 48 | 66  | 526 | 65,90% | LG       | -19329,61625 | 0,459151 | 0,46621  | 0   | 0   |          |
| VBP1         | 43 | 79  | 129 | 47,90% | LG       | -7049,32631  | 0,319827 | 0,370876 | 0   | 0   |          |
| vpc          | 73 | 54  | 456 | 79,70% | LG       | -10499,67654 | 0,294834 | 0,323803 | yes | yes | ACCEPTED |
| VPS18        | 27 | 101 | 441 | 46,70% | LG       | -15118,53653 | 0,521031 | 0,539672 | 0   | 0   |          |
| VPS26B       | 60 | 65  | 187 | 66,90% | LG       | -6771,809835 | 0,398249 | 0,420922 | 0   | 0   | ACCEPTED |
| vps4         | 63 | 60  | 194 | 72,60% | LG       | -6591,279974 | 0,338121 | 0,354526 | 0   | 0   | ACCEPTED |
| wars         | 59 | 38  | 244 | 66,10% | LG       | -11033,81374 | 0,248931 | 0,291756 | yes | 0   | ACCEPTED |
| WBSCR22      | 50 | 66  | 201 | 59,90% | LG       | -10051,88619 | 0,404664 | 0,426312 | 0   | 0   | ACCEPTED |
| xpb          | 49 | 109 | 285 | 67,30% | LG       | -10121,99666 | 0,424055 | 0,438759 | 0   | 0   | ACCEPTED |
| XRP2         | 22 | 91  | 129 | 46,50% | LG       | -4369,734607 | 0,278992 | 0,306433 | 0   | 0   |          |
| YKT6         | 49 | 102 | 117 | 53,00% | LG       | -5621,869644 | 0,39287  | 0,405895 | 0   | 0   | ACCEPTED |

S2 Taxon information

**Supplementary table S2:** Statistics for the taxa in the multigene datasets. **Taxon name:** the name of the taxon as used in the multigene trees and alignment. **Composite:** Some closely related species have been merged into one sequence in the alignment. **Missing, 255G:** The percentage of missing data for the given taxon in the 255 gene alignment. **Missing, 146G:** The percentage of missing data for the given taxon in the 146 gene alignment. **Notes:** Taxa marked EPA have been placed with the Evolutionary Placement Algorithm (Berger, *et al.* 2011), taxa marked with RogueNaRok was identified as jumping taxa and removed before concatenation (Aberer *et al.*, 2013)

| Taxon name                     | Composite                                                                 | Missing, 255G | Missing, 146G | Notes |
|--------------------------------|---------------------------------------------------------------------------|---------------|---------------|-------|
| Acanthamoeba sp.               | Acanthamoeba sp,<br>Acanthamoeba astronyxis,<br>Acanthamoeba castellanii  | 57            | 46            | -     |
| Alexandrium sp.                | Alexandrium catenella,<br>Alexandrium fundyense,<br>Alexandrium tamarense | 74            | 69            | -     |
| Ammonia sp.                    | Ammonia sp., Ammonia<br>beccarii                                          | 49            | 32            | -     |
| Amorphochlora amoebiformis     | -                                                                         | 35            | 14            | -     |
| Amphidinium carterae           | -                                                                         | 89            | 84            | -     |
| Arabidopsis sp.                | Arabidopsis lyrata,<br>Arabidopsis thaliana                               | 10            | 2             | -     |
| Astrolonche sp                 | -                                                                         | 72            | 60            | -     |
| Aulacantha scolymantha         | -                                                                         | 92            | 88            | -     |
| Aureococcus anophagefferens    | -                                                                         | 18            | 6             | -     |
| Batrachochytrium dendrobatidis | -                                                                         | 9             | 4             | -     |
| Bigelowiella longifila         | -                                                                         | 52            | 37            | -     |
| Bigelowiella natans            | -                                                                         | 12            | 2             | -     |
| Brachypodium distachyon        | -                                                                         | 12            | 3             | -     |
| Branchiostoma floridae         | -                                                                         | 6             | 3             | -     |
| Calliarthron tuberculosum      | -                                                                         | 90            | 90            | -     |
| Cercomonas longicauda          | -                                                                         | 84            | 80            | -     |
| Chlamydomonas reinhardtii      | -                                                                         | 16            | 6             | -     |
| Chlorarachnion reptans         | -                                                                         | 32            | 9             | -     |
| Chondrus crispus               | -                                                                         | 85            | 81            | -     |
| Coccolithus braarudii          | -                                                                         | 86            | 82            | -     |
| Coccomyxa sp                   | -                                                                         | 12            | 1             | -     |
| Collozoum sp                   | Collozoum sp., Collozoum<br>inerme                                        | 93            | 90            | -     |
| Coralline                      | -                                                                         | 80            | 74            | -     |
| Corallomyxa sp                 | Corallomyxa sp.,<br>Corallomyxa tenera                                    | 92            | 88            | -     |
| Cryptosporidium parvum         | -                                                                         | 33            | 15            | -     |
| Cyanophora paradoxa            | -                                                                         | 71            | 65            | -     |
| Dictyostelium discoideum       | -                                                                         | 11            | 4             | -     |
| Ectocarpus siliculosus         | -                                                                         | 8             | 4             | -     |
| Eimeria tenella                | -                                                                         | 91            | 88            | -     |
| Elphidium sp                   | Elphidium sp., Elphidium<br>margaritaceum                                 | 50            | 32            | -     |
| Emiliana huxleyi               | -                                                                         | 29            | 17            | -     |
| Eucheuma denticulatum          | -                                                                         | 87            | 85            | -     |
| Euglena sp                     | Euglena gracilis, Euglena<br>mutabilis                                    | 69            | 63            | -     |
| Fragilaria pinnata             | -                                                                         | 86            | 79            | -     |
| Fragilariopsis cylindrus       | -                                                                         | 67            | 51            | -     |
| Glaucocystis nostochinearum    | -                                                                         | 73            | 66            | -     |
| Globobulimina turgida          | -                                                                         | 88            | 81            | -     |
| Gracilaria changii             | -                                                                         | 79            | 74            | -     |
| Gromia sphaerica               | -                                                                         | 77            | 69            | -     |
| Guillardia theta               | -                                                                         | 4             | 1             | -     |
| Gymnochlora sp                 | -                                                                         | 39            | 16            | -     |
| Histiona aroides               | -                                                                         | 87            | 84            | -     |

S2 Taxon information

|                             |                                               |    |    |     |
|-----------------------------|-----------------------------------------------|----|----|-----|
| Homo sapiens                | -                                             | 1  | 1  | -   |
| Isochrysis galbana          | -                                             | 81 | 74 | -   |
| Jakoba sp                   | Jakoba bahamensis, Jakoba libera              | 69 | 65 | -   |
| Karenia brevis              | -                                             | 83 | 77 | -   |
| Laminaria sp                | -                                             | 92 | 89 | -   |
| Lithomelissa setosa         | -                                             | 94 | 90 | -   |
| Lotharella globosa          | -                                             | 34 | 17 | -   |
| Lotharella oceanica         | -                                             | 46 | 27 | -   |
| Mesostigma viride           | -                                             | 83 | 81 | -   |
| Micromonas pusilla          | -                                             | 45 | 46 | -   |
| Mimulus guttatus            | -                                             | 16 | 6  | -   |
| Monosiga brevicollis        | -                                             | 42 | 27 | -   |
| Naegleria gruberi           | -                                             | 18 | 14 | -   |
| Nematostella vectensis      | -                                             | 6  | 5  | -   |
| Neospora caninum            | -                                             | 26 | 13 | -   |
| Nonionellina sp             | Nonionellina sp, Nonionella labradorica       | 92 | 89 | -   |
| Norrsiella sphaerica        | -                                             | 41 | 23 | -   |
| Oryza sativa                | -                                             | 13 | 3  | -   |
| Ostreococcus sp             | Ostreococcus lucimarinus, Ostreococcus tauri  | 20 | 8  | -   |
| Oxyrrhis marina             | -                                             | 78 | 73 | -   |
| Paramecium tetraurelia      | -                                             | 21 | 17 | -   |
| Partenskyella glossopodia   | -                                             | 32 | 12 | -   |
| Pavlova lutheri             | -                                             | 78 | 74 | -   |
| Perkinsus marinus           | -                                             | 25 | 7  | -   |
| Phaeodactylum tricornutum   | -                                             | 19 | 6  | -   |
| Phycomyces blakesleeanus    | -                                             | 15 | 7  | -   |
| Phyllostaurus sp            | Phyllostaurus sp., Phyllostaurus siculus      | 83 | 76 | -   |
| Physcomitrella patens       | -                                             | 8  | 3  | -   |
| Phytophthora sp             | Phytophthora ramorum, Phytophthora sojae      | 6  | 3  | -   |
| Plagioselmis sp             | Plagioselmis sp., Plagioselmis nannoplanctica | 75 | 73 | -   |
| Populus trichocarpa         | -                                             | 13 | 6  | -   |
| Porphyra yezoensis          | -                                             | 62 | 50 | -   |
| Porphyridium cruentum       | -                                             | 50 | 36 | -   |
| Prymnesium parvum           | -                                             | 80 | 74 | -   |
| Pythium oligandrum          | -                                             | 84 | 76 | -   |
| Reclinomonas americana      | -                                             | 61 | 57 | -   |
| Reticulomyxa filosa         | -                                             | 50 | 36 | -   |
| Rhodomonas salina           | -                                             | 91 | 89 | -   |
| Roombia truncata            | -                                             | 32 | 32 | -   |
| Saprolegnia parasitica      | -                                             | 10 | 6  | -   |
| Seculamonas ecuadoriensis   | -                                             | 69 | 62 | -   |
| Sorghum bicolor             | -                                             | 12 | 2  | -   |
| Spongosphaera streptacantha | -                                             | 91 | 87 | -   |
| Stachyamoeba lipophora      | -                                             | 86 | 83 | -   |
| Sticholonche zancela        | -                                             | 81 | 70 | -   |
| Tetrahymena pyriformis      | -                                             | 19 | 14 | -   |
| Thalassiosira pseudonana    | -                                             | 17 | 5  | -   |
| Theileria parva             | -                                             | 77 | 67 | -   |
| Toxoplasma gondii           | -                                             | 25 | 10 | -   |
| Volvox carteri              | -                                             | 11 | 3  | -   |
| Allogromia sp.              | -                                             | 99 | 99 | EPA |
| Amphilonche elongata        | -                                             | 95 | 92 | EPA |
| Bodomorpha minima           | -                                             | 99 | 99 | EPA |
| Bonamia ostreae             | -                                             | 99 | 99 | EPA |



S2 Taxon information

|                            |   |    |    |            |
|----------------------------|---|----|----|------------|
| Brizalina sp               | - | 98 | 97 | EPA        |
| Bulimina marginata         | - | 95 | 93 | EPA        |
| Globigerinella siphonifera | - | 99 | 99 | EPA        |
| Globigerinita glutinata    | - | 99 | 99 | EPA        |
| Gymnophrys sp              | - | 99 | 99 | EPA        |
| Haplosporidium littoralis  | - | 99 | 99 | EPA        |
| Haynesina germanica        | - | 99 | 99 | EPA        |
| Larcopyle butschlii        | - | 99 | 99 | EPA        |
| Leptophrys sp              | - | 99 | 99 | EPA        |
| Limnofila borokensis       | - | 97 | 96 | EPA        |
| Massisteria marina         | - | 99 | 99 | EPA        |
| Micatuba flexilis          | - | 99 | 99 | EPA        |
| Miliolidae sp              | - | 99 | 99 | EPA        |
| Plasmodiophora brassicae   | - | 94 | 92 | EPA        |
| Quinqueloculina sp         | - | 96 | 95 | EPA        |
| Rosseyatella sp            | - | 99 | 99 | EPA        |
| Spongospora subterranea    | - | 96 | 94 | EPA        |
| Blastocystis hominis       | - | -  | -  | RogueNaRok |
| Cyanidioschyzon merolae    | - | -  | -  | RogueNaRok |
| Galdieria sulphuraria      | - | -  | -  | RogueNaRok |
| Schizochytrium sp.         | - | -  | -  | RogueNaRok |

S3 Concatenated alignments

**Supplementary table S3:** Statistics for the concatenated alignments. **Genes:** the number of genes in the alignment. **Characters:** The number of amino acids in the alignment. **Min.mis:** the lowest allowed percentage for missing data for a taxon in the alignment. **Cat.rem.:** the number of categories of fast evolving sites removed. **Taxa:** the number of taxa in the alignment. **Excluded taxa:** The name of excluded taxa, if any. **Method:** The method used for phylogenetic inference pb-Bayesian inference with Phylobayes mpi version 1.5a (Lartillot *et al.*, 2013), RAxML= maximum likelihood inference with RAxML v 8.0.26 (Stamatakis 2014). **Model:** The model used for the inference. **Max.diff:** (only for Bayesian), maximum difference in posterior probability support between two chains that ran independently. **TCA\_rel:** (only for maximum likelihood), The relative Tree certainty index for all nodes (Salichos *et al.*, 2014), calculated on the bootstrap files for the inference.

Table 3A: 255 Genes, Bayesian

| alignment name    | Genes | Characters | min.mis. | Cat.rem | taxa | Excluded taxa | Method | Model  | Max diff |
|-------------------|-------|------------|----------|---------|------|---------------|--------|--------|----------|
| 255G_min10        | 255   | 54898      | 10       | 0       | 91   | 0             | pb     | CATGTR | 0,266411 |
| 255G_min10_rmcat4 | 255   | 54898      | 10       | 4       | 91   | 0             | pb     | CATGTR | 0,30002  |

Table 3B: 147 Genes, Bayesian

| alignment name             | Genes | Characters | min.mis. | #cat.rem | taxa | Excluded taxa           | Method | Model  | Max diff |
|----------------------------|-------|------------|----------|----------|------|-------------------------|--------|--------|----------|
| 146G_min10.CATGTR          | 146   | 33081      | 10       | 0        | 91   | 0                       | pb     | CATGTR | 0,286544 |
| 146G_min10.LG              | 146   | 33081      | 10       | 0        | 91   | 0                       | pb     | LG     | 0,355603 |
| 146G_min10_exSpongo.CATGTR | 146   | 32952      | 10       | 0        | 90   | <i>S. streptacantha</i> | pb     | CATGTR | 0,171197 |
| 146G_min10_exSticho.CATGTR | 146   | 32952      | 10       | 0        | 90   | <i>S. zancea</i>        | pb     | CATGTR | 0,29748  |

Table 3C: 255 Genes, Maximum Likelihood.

| alignment name                      | Genes | Characters | min.mis. | #cat.rem | taxa | Excluded taxa                  | Method | Model | TCA_rel  |
|-------------------------------------|-------|------------|----------|----------|------|--------------------------------|--------|-------|----------|
| 255G                                | 255   | 54898      | 0        | 0        | 124  | 0                              | RAxML  | LG    | 0,565162 |
| 255G_min10                          | 255   | 54898      | 10       | 0        | 91   | 0                              | RAxML  | LG    | 0,891783 |
| 255G_min20                          | 255   | 54898      | 20       | 0        | 69   | 0                              | RAxML  | LG    | 0,879462 |
| 255G_min30                          | 255   | 54898      | 30       | 0        | 55   | 0                              | RAxML  | LG    | 0,881501 |
| 255G_min10_rmcat1                   | 255   | 54825      | 10       | 1        | 91   | 0                              | RAxML  | LG    | 0,886363 |
| 255G_min10_rmcat2                   | 255   | 54247      | 10       | 2        | 91   | 0                              | RAxML  | LG    | 0,899755 |
| 255G_min10_rmcat3                   | 255   | 52502      | 10       | 3        | 91   | 0                              | RAxML  | LG    | 0,888871 |
| 255G_min10_rmcat4                   | 255   | 48410      | 10       | 4        | 91   | 0                              | RAxML  | LG    | 0,842282 |
| 255G_min10_exSpongo                 | 255   | 54898      | 10       | 0        | 90   | <i>S. streptacantha</i>        | RAxML  | LG    | 0,893954 |
| 255G_min10_exSpongo_rmcat1          | 255   | 54814      | 10       | 1        | 90   | <i>S. streptacantha</i>        | RAxML  | LG    | 0,908864 |
| 255G_min10_exSpongo_rmcat2          | 255   | 54131      | 10       | 2        | 90   | <i>S. streptacantha</i>        | RAxML  | LG    | 0,910279 |
| 255G_min10_exSpongo_rmcat3          | 255   | 52157      | 10       | 3        | 90   | <i>S. streptacantha</i>        | RAxML  | LG    | 0,897523 |
| 255G_min10_exSpongo_rmcat4          | 255   | 47572      | 10       | 4        | 90   | <i>S. streptacantha</i>        | RAxML  | LG    | 0,852508 |
| 255G_min10_exSticho                 | 255   | 54898      | 10       | 0        | 90   | <i>S. zancea</i>               | RAxML  | LG    | 0,900949 |
| 255G_min10_exSticho_rmcat1          | 255   | 54831      | 10       | 1        | 90   | <i>S. zancea</i>               | RAxML  | LG    | 0,904303 |
| 255G_min10_exSticho_rmcat2          | 255   | 54309      | 10       | 2        | 90   | <i>S. zancea</i>               | RAxML  | LG    | 0,906108 |
| 255G_min10_exSticho_rmcat3          | 255   | 52624      | 10       | 3        | 90   | <i>S. zancea</i>               | RAxML  | LG    | 0,883426 |
| 255G_min10_exSticho_rmcat4          | 255   | 48585      | 10       | 4        | 90   | <i>S. zancea</i>               | RAxML  | LG    | 0,817331 |
| 255G_min10_exSpongo_exSticho        | 255   | 54898      | 10       | 0        | 89   | <i>S. strep. and S. zancea</i> | RAxML  | LG    | 0,901578 |
| 255G_min10_exSpongo_exSticho_rmcat1 | 255   | 54823      | 10       | 1        | 89   | <i>S. strep. and S. zancea</i> | RAxML  | LG    | 0,898729 |
| 255G_min10_exSpongo_exSticho_rmcat2 | 255   | 54211      | 10       | 2        | 89   | <i>S. strep. and S. zancea</i> | RAxML  | LG    | 0,902772 |
| 255G_min10_exSpongo_exSticho_rmcat3 | 255   | 52308      | 10       | 3        | 89   | <i>S. strep. and S. zancea</i> | RAxML  | LG    | 0,895606 |
| 255G_min10_exSpongo_exSticho_rmcat4 | 255   | 47774      | 10       | 4        | 89   | <i>S. strep. and S. zancea</i> | RAxML  | LG    | 0,871055 |
| 255G_min10_exForams                 | 255   | 54898      | 10       | 0        | 86   | Foraminifera                   | RAxML  | LG    | 0,896866 |
| 255G_min10_exForams_rmcat1          | 255   | 54842      | 10       | 1        | 86   | Foraminifera                   | RAxML  | LG    | 0,903465 |
| 255G_min10_exForams_rmcat2          | 255   | 54188      | 10       | 2        | 86   | Foraminifera                   | RAxML  | LG    | 0,902428 |
| 255G_min10_exForams_rmcat3          | 255   | 52222      | 10       | 3        | 86   | Foraminifera                   | RAxML  | LG    | 0,887357 |
| 255G_min10_exForams_rmcat4          | 255   | 47464      | 10       | 4        | 86   | Foraminifera                   | RAxML  | LG    | 0,848266 |

Table 3D: 147 Genes, Maximum Likelihood.

| alignment name             | Genes | Characters | min.mis. | #cat.rem | taxa | Excluded taxa           | Method | Model | TCA_rel  |
|----------------------------|-------|------------|----------|----------|------|-------------------------|--------|-------|----------|
| 146G                       | 146   | 33081      | 0        | 0        | 124  | 0                       | RAxML  | LG    | 0,544504 |
| 146G_rmcat1                | 146   | 25236      | 0        | 1        | 124  | 0                       | RAxML  | LG    | 0,436772 |
| 146G_rmcat2                | 146   | 13424      | 0        | 2        | 124  | 0                       | RAxML  | LG    | 0,204149 |
| 146G_rmcat3                | 146   | 8470       | 0        | 3        | 124  | 0                       | RAxML  | LG    | 0,074327 |
| 146G_min10                 | 146   | 32952      | 10       | 0        | 91   | 0                       | RAxML  | LG    | 0,854739 |
| 146G_min20                 | 146   | 33081      | 20       | 0        | 74   | 0                       | RAxML  | LG    | 0,860809 |
| 146G_min30                 | 146   | 33081      | 30       | 0        | 62   | 0                       | RAxML  | LG    | 0,843727 |
| 146G_min10_rmcat1          | 146   | 33007      | 10       | 1        | 91   | 0                       | RAxML  | LG    | 0,856469 |
| 146G_min10_rmcat2          | 146   | 32344      | 10       | 2        | 91   | 0                       | RAxML  | LG    | 0,87058  |
| 146G_min10_rmcat3          | 146   | 30512      | 10       | 3        | 91   | 0                       | RAxML  | LG    | 0,829692 |
| 146G_min10_rmcat4          | 146   | 26726      | 10       | 4        | 91   | 0                       | RAxML  | LG    | 0,77852  |
| 146G_min10_exSpongo        | 146   | 32952      | 10       | 0        | 90   | <i>S. streptacantha</i> | RAxML  | LG    | 0,865018 |
| 146G_min10_exSpongo_rmcat1 | 146   | 32869      | 10       | 1        | 90   | <i>S. streptacantha</i> | RAxML  | LG    | 0,870338 |
| 146G_min10_exSpongo_rmcat2 | 146   | 32109      | 10       | 2        | 90   | <i>S. streptacantha</i> | RAxML  | LG    | 0,873687 |
| 146G_min10_exSpongo_rmcat3 | 146   | 30202      | 10       | 3        | 90   | <i>S. streptacantha</i> | RAxML  | LG    | 0,82786  |
| 146G_min10_exSpongo_rmcat4 | 146   | 26177      | 10       | 4        | 90   | <i>S. streptacantha</i> | RAxML  | LG    | 0,787182 |
| 146G_min10_exSticho        | 146   | 33081      | 10       | 0        | 90   | <i>S. zancea</i>        | RAxML  | LG    | 0,873601 |

S3 Concatenated alignments

|                                     |     |       |    |   |    |                                 |       |    |          |
|-------------------------------------|-----|-------|----|---|----|---------------------------------|-------|----|----------|
| 146G_min10_exSticho_rmcat1          | 146 | 33021 | 10 | 1 | 90 | <i>S. zanclea</i>               | RAxML | LG | 0,890642 |
| 146G_min10_exSticho_rmcat2          | 146 | 32483 | 10 | 2 | 90 | <i>S. zanclea</i>               | RAxML | LG | 0,888718 |
| 146G_min10_exSticho_rmcat3          | 146 | 30767 | 10 | 3 | 90 | <i>S. zanclea</i>               | RAxML | LG | 0,863364 |
| 146G_min10_exSticho_rmcat4          | 146 | 27153 | 10 | 4 | 90 | <i>S. zanclea</i>               | RAxML | LG | 0,791703 |
| 146G_exSpongo_exSticho_min10        | 146 | 32952 | 10 | 0 | 89 | <i>S. strep. and S. zanclea</i> | RAxML | LG | 0,878715 |
| 146G_exSpongo_exSticho_min10_rmcat1 | 146 | 32887 | 10 | 1 | 89 | <i>S. strep. and S. zanclea</i> | RAxML | LG | 0,876233 |
| 146G_exSpongo_exSticho_min10_rmcat2 | 146 | 32258 | 10 | 2 | 89 | <i>S. strep. and S. zanclea</i> | RAxML | LG | 0,879483 |
| 146G_exSpongo_exSticho_min10_rmcat3 | 146 | 30450 | 10 | 3 | 89 | <i>S. strep. and S. zanclea</i> | RAxML | LG | 0,85276  |
| 146G_exSpongo_exSticho_min10_rmcat4 | 146 | 26609 | 10 | 4 | 89 | <i>S. strep. and S. zanclea</i> | RAxML | LG | 0,795294 |
| 146G_min10_exForam                  | 146 | 33081 | 10 | 0 | 86 | Foraminifera                    | RAxML | LG | 0,874225 |
| 146G_min10_exForam_rmcat1           | 146 | 33026 | 10 | 1 | 86 | Foraminifera                    | RAxML | LG | 0,869218 |
| 146G_min10_exForam_rmcat2           | 146 | 32328 | 10 | 2 | 86 | Foraminifera                    | RAxML | LG | 0,878678 |
| 146G_min10_exForam_rmcat3           | 146 | 30417 | 10 | 3 | 86 | Foraminifera                    | RAxML | LG | 0,847643 |
| 146G_min10_exForam_rmcat4           | 146 | 26443 | 10 | 4 | 86 | Foraminifera                    | RAxML | LG | 0,764009 |

**Supplementary table S4:** The posterior probability (bayesian) and bootstrap support (maximum likelihood) for selected nodes. The support values has been heatmapped with a three color scheme, Green color= high support, yellow=medium support, red= low support. NM= not monophyletic, i.e. the clade or node does not exist for that particular inference. NA=Not applicable, i.e. the clade or node does not exist because some taxa has been removed. For the specifics for each alignment refer to table S3. Tax=Taxopodida; Rad=Radiolaria; Foram=Foraminifer; SAR=Stramenopile, Alveolates, Rhizaria; Red=Rhodophyta; Green=Chlorophytes; Glauco=Glaucophyta; Crypto=Cryptophyta

Table 4A: 255 Genes, Bayesian

| alignment name         | Topologies/Clades |                      |                     |                      |        |        |                          |                  |                      |                             |             |    |
|------------------------|-------------------|----------------------|---------------------|----------------------|--------|--------|--------------------------|------------------|----------------------|-----------------------------|-------------|----|
|                        | Rhizaria          | (Tax, Rad)<br>*Foram | Tax*<br>(Rad,Foram) | Endomyxa+R<br>etaria | (SA)*R | S*(AR) | (SAR) Hapt (Red + Green) | Green+<br>Glauco | Red+Green+<br>Glauco | Red+Green+<br>Glauco+Crypto | Hapt+Crypto |    |
| 255G_min10.CATGTR      | 1                 | NM                   | 0,71                | 1                    | 1      | NM     | 0,87                     | 1                | NM                   | 1                           | 1           | NM |
| 255G_min10_rmc4.CATGTR | 1                 | NM                   | 0,97                | 1                    | 1      | NM     | NM                       | 1                | NM                   | 0,96                        | 0,93        | NM |

Table 4B: 147 Genes, Bayesian

| alignment name             | Topologies/Clades |                      |                     |                      |        |        |                          |                  |                      |                             |             |    |
|----------------------------|-------------------|----------------------|---------------------|----------------------|--------|--------|--------------------------|------------------|----------------------|-----------------------------|-------------|----|
|                            | Rhizaria          | (Tax, Rad)<br>*Foram | Tax*<br>(Rad,Foram) | Endomyxa+R<br>etaria | (SA)*R | S*(AR) | (SAR) Hapt (Red + Green) | Green+<br>Glauco | Red+Green+<br>Glauco | Red+Green+<br>Glauco+Crypto | Hapt+Crypto |    |
| 146G_min10.CATGTR          | 1                 | NM                   | 0,81                | 1                    | 1      | NM     | 1                        | 0,84             | NM                   | 1                           | 1           | NM |
| 146G_min10.LG              | 1                 | 0,67                 | NM                  | 1                    | 1      | NM     | 1                        | 0,53             | NM                   | 1                           | 1           | NM |
| 146G_min10_exSpongo.CATGTR | 1                 | 1                    | NM                  | 1                    | 1      | NM     | 1                        | 0,93             | NM                   | 0,93                        | 1           | NM |
| 146G_min10_exSticho.CATGTR | 1                 | NA                   | NA                  | 1                    | 1      | NM     | 1                        | 0,82             | NM                   | 0,95                        | 1           | NM |

Table 4C: 255 Genes, Maximum Likelihood.

| alignment name                    | Topologies/Clades |                      |                     |                      |        |        |                          |                  |                      |                             |             |    |
|-----------------------------------|-------------------|----------------------|---------------------|----------------------|--------|--------|--------------------------|------------------|----------------------|-----------------------------|-------------|----|
|                                   | Rhizaria          | (Tax, Rad)<br>*Foram | Tax*<br>(Rad,Foram) | Endomyxa+R<br>etaria | (SA)*R | S*(AR) | (SAR) Hapt (Red + Green) | Green+<br>Glauco | Red+Green+<br>Glauco | Red+Green+<br>Glauco+Crypto | Hapt+Crypto |    |
| 255G                              | NM                | 63                   | NM                  | NM                   | NM     | NM     | NM                       | NM               | NM                   | NM                          | NM          | NM |
| 255G_min10                        | 100               | 88                   | NM                  | 98                   | NM     | 96     | 79                       | 81               | NM                   | NM                          | 79          | NM |
| 255G_min20                        | 100               | 51                   | NM                  | 94                   | NM     | 96     | 90                       | 79               | NM                   | NM                          | 90          | NM |
| 255G_min30                        | 100               | NA                   | NA                  | 100                  | NM     | 97     | 77                       | 92               | 100                  | 92                          | 77          | NM |
| 255G_min10_rmc1                   | 100               | 65                   | NM                  | 98                   | NM     | 94     | 88                       | 94               | NM                   | NM                          | 90          | NM |
| 255G_min10_rmc2                   | 100               | 69                   | NM                  | 100                  | NM     | 94     | 77                       | 77               | NM                   | NM                          | 79          | NM |
| 255G_min10_rmc3                   | 100               | NM                   | 25                  | 100                  | NM     | 94     | 85                       | 85               | NM                   | NM                          | 92          | NM |
| 255G_min10_rmc4                   | 100               | NM                   | 50                  | 90                   | NM     | 67     | NM                       | 79               | NM                   | NM                          | 50          | NM |
| 255G_min10_exSpongo               | 100               | 71                   | NM                  | 100                  | NM     | 94     | 81                       | 81               | NM                   | NM                          | 81          | NM |
| 255G_min10_exSpongo_rmc1          | 100               | 67                   | NM                  | 98                   | NM     | 98     | 90                       | 88               | NM                   | NM                          | 90          | NM |
| 255G_min10_exSpongo_rmc2          | 100               | 67                   | NM                  | 98                   | NM     | 96     | 90                       | 96               | NM                   | NM                          | 92          | NM |
| 255G_min10_exSpongo_rmc3          | 100               | 48                   | NM                  | 98                   | NM     | 96     | 85                       | 90               | NM                   | NM                          | 88          | NM |
| 255G_min10_exSpongo_rmc4          | 100               | 49                   | NM                  | 95                   | 48     | NM     | NM                       | 67               | NM                   | 46                          | NM          | 33 |
| 255G_min10_exSticho               | 100               | NA                   | NA                  | 98                   | NM     | 94     | 81                       | 88               | NM                   | NM                          | 83          | NM |
| 255G_min10_exSticho_rmc1          | 100               | NA                   | NA                  | 100                  | NM     | 98     | 90                       | 85               | NM                   | NM                          | 83          | NM |
| 255G_min10_exSticho_rmc2          | 100               | NA                   | NA                  | 100                  | NM     | 100    | 88                       | 87               | NM                   | NM                          | 88          | NM |
| 255G_min10_exSticho_rmc3          | 100               | NA                   | NA                  | 98                   | NM     | 92     | 83                       | 87               | NM                   | NM                          | 90          | NM |
| 255G_min10_exSticho_rmc4          | 100               | NA                   | NA                  | 94                   | NM     | 71     | NM                       | 83               | NM                   | NM                          | 44          | NM |
| 255G_min10_exSpongo_exSticho      | 100               | NA                   | NA                  | 98                   | NM     | 100    | 83                       | 81               | NM                   | NM                          | 83          | NM |
| 255G_min10_exSpongo_exSticho_rmc1 | 100               | NA                   | NA                  | 98                   | NM     | 100    | 85                       | 83               | NM                   | NM                          | 87          | NM |
| 255G_min10_exSpongo_exSticho_rmc2 | 100               | NA                   | NA                  | 98                   | NM     | 100    | 87                       | 90               | NM                   | NM                          | 90          | NM |
| 255G_min10_exSpongo_exSticho_rmc3 | 100               | NA                   | NA                  | 97                   | NM     | 83     | 77                       | 85               | NM                   | NM                          | 90          | NM |
| 255G_min10_exSpongo_exSticho_rmc4 | 100               | NA                   | NA                  | 100                  | NM     | 60     | NM                       | 60               | NM                   | 44                          | NM          | 37 |
| 255G_min10_exForams               | 100               | NA                   | NA                  | 100                  | NM     | 92     | 83                       | 83               | NM                   | NM                          | 85          | NM |
| 255G_min10_exForams_rmc1          | 100               | NA                   | NA                  | 100                  | NM     | 85     | 87                       | 92               | NM                   | NM                          | 88          | NM |
| 255G_min10_exForams_rmc2          | 100               | NA                   | NA                  | 100                  | NM     | 92     | 96                       | 83               | NM                   | NM                          | 96          | NM |
| 255G_min10_exForams_rmc3          | 100               | NA                   | NA                  | 100                  | NM     | 85     | 94                       | 92               | NM                   | NM                          | 96          | NM |
| 255G_min10_exForams_rmc4          | 100               | NA                   | NA                  | 100                  | 57     | NM     | NM                       | 64               | NM                   | 59                          | NM          | 42 |

Table 4D: 147 Genes, Maximum Likelihood.

| alignment name                    | Topologies/Clades |                      |                     |                      |        |        |                          |                  |                      |                             |             |    |
|-----------------------------------|-------------------|----------------------|---------------------|----------------------|--------|--------|--------------------------|------------------|----------------------|-----------------------------|-------------|----|
|                                   | Rhizaria          | (Tax, Rad)<br>*Foram | Tax*<br>(Rad,Foram) | Endomyxa+R<br>etaria | (SA)*R | S*(AR) | (SAR) Hapt (Red + Green) | Green+<br>Glauco | Red+Green+<br>Glauco | Red+Green+<br>Glauco+Crypto | Hapt+Crypto |    |
| 146G                              | NM                | 62                   | NM                  | NM                   | NM     | NM     | NM                       | NM               | NM                   | NM                          | NM          | NM |
| 146G_rmc1                         | NM                | 53                   | NM                  | NM                   | 60     | NM     | NM                       | NM               | NM                   | NM                          | NM          | NM |
| 146G_rmc2                         | NM                | NM                   | NM                  | NM                   | NM     | NM     | NM                       | NM               | NM                   | NM                          | NM          | NM |
| 146G_rmc3                         | NM                | 4                    | NM                  | NM                   | NM     | NM     | NM                       | NM               | NM                   | NM                          | NM          | NM |
| 146G_min10                        | 100               | 87                   | NM                  | 100                  | NM     | 85     | 69                       | 44               | NM                   | 46                          | 67          | NM |
| 146G_min20                        | 100               | 64                   | NM                  | 100                  | NM     | 85     | 72                       | NM               | 55                   | 42                          | 73          | NM |
| 146G_min30                        | 100               | NA                   | NA                  | NA                   | NM     | 95     | 66                       | NM               | 58                   | 47                          | 69          | NM |
| 146G_min10_rmc1                   | 100               | 85                   | NM                  | 100                  | NM     | 90     | 79                       | 48               | NM                   | 65                          | 77          | NM |
| 146G_min10_rmc2                   | 100               | 58                   | NM                  | 100                  | NM     | 92     | 90                       | NM               | 46                   | 71                          | 85          | NM |
| 146G_min10_rmc3                   | 100               | 27                   | NM                  | 96                   | NM     | 71     | 85                       | NM               | 60                   | 69                          | 88          | NM |
| 146G_min10_rmc4                   | 100               | NM                   | 75                  | 97                   | 74     | NM     | NM                       | 48               | NM                   | 52                          | NM          | 29 |
| 146G_min10_exSpongo               | 100               | 86                   | NM                  | NM                   | NM     | 86     | 69                       | 39               | NM                   | 53                          | 70          | NM |
| 146G_min10_exSpongo_rmc1          | 100               | 79                   | NM                  | 100                  | NM     | 87     | 65                       | 42               | NM                   | 58                          | 69          | NM |
| 146G_min10_exSpongo_rmc2          | 100               | 83                   | NM                  | 100                  | NM     | 96     | 88                       | 50               | NM                   | 65                          | 90          | NM |
| 146G_min10_exSpongo_rmc3          | 100               | 63                   | NM                  | 98                   | NM     | 78     | 78                       | 56               | NM                   | NM                          | 84          | NM |
| 146G_min10_exSpongo_rmc4          | 100               | 51                   | NM                  | 97                   | 70     | NM     | NM                       | NM               | NM                   | 74                          | NM          | 38 |
| 146G_min10_exSticho               | 100               | NA                   | NA                  | 100                  | NM     | 90     | 67                       | 46               | NM                   | 52                          | 69          | NM |
| 146G_min10_exSticho_rmc1          | 100               | NA                   | NA                  | 100                  | NM     | 92     | 83                       | 42               | NM                   | 65                          | 71          | NM |
| 146G_min10_exSticho_rmc2          | 100               | NA                   | NA                  | 100                  | NM     | 94     | 85                       | 65               | NM                   | 62                          | 83          | NM |
| 146G_min10_exSticho_rmc3          | 100               | NA                   | NA                  | 98                   | NM     | 75     | 88                       | NM               | 46                   | 48                          | 90          | NM |
| 146G_min10_exSticho_rmc4          | 100               | NA                   | NA                  | 96                   | 67     | NM     | NM                       | 52               | NM                   | 58                          | NM          | 35 |
| 146G_exSpongo_exSticho_min10      | 100               | NA                   | NA                  | 100                  | NM     | 85     | 71                       | 40               | NM                   | 67                          | 73          | NM |
| 146G_exSpongo_exSticho_min10_rmc1 | 100               | NA                   | NA                  | 100                  | NM     | 96     | 69                       | 42               | NM                   | 56                          | 71          | NM |
| 146G_exSpongo_exSticho_min10_rmc2 | 100               | NA                   | NA                  | 100                  | NM     | 94     | 79                       | 52               | NM                   | 65                          | 81          | NM |
| 146G_exSpongo_exSticho_min10_rmc3 | 100               | NA                   | NA                  | 100                  | NM     | 79     | 79                       | NM               | 52                   | 63                          | 85          | NM |
| 146G_exSpongo_exSticho_min10_rmc4 | 100               | NA                   | NA                  | 98                   | 66     | NM     | NM                       | NM               | NM                   | 63                          | NM          | 38 |
| 146G_min10_exForam                | 100               | NA                   | NA                  | 100                  | NM     | 85     | 75                       | 44               | NM                   | 67                          | 71          | NM |
| 146G_min10_exForam_rmc1           | 100               | NA                   | NA                  | 100                  | NM     | 94     | 73                       | 38               | NM                   | 52                          | 75          | NM |
| 146G_min10_exForam_rmc2           | 100               | NA                   | NA                  | 100                  | NM     | 87     | 87                       | NM               | 62                   | 73                          | 79          | NM |
| 146G_min10_exForam_rmc3           | 100               | NA                   | NA                  | 100                  | NM     | 82     | 83                       | 61               | NM                   | NM                          | 91          | NM |
| 146G_min10_exForam_rmc4           | 100               | NA                   | NA                  | 89                   | 68     | NM     | 52                       | 43               | NM                   | 63                          | 56          | NM |
